# Supplementary material for: Copper-Catalyzed Synthesis of 4-CF3-1,2,3-Triazoles: An Efficient and Facile Approach via Click Reaction
Source: MDPI journal article supplement (doi:10.3390/molecules29061191), 2024-03-07
Supplement: s1 [file s1]

# Copper-Catalyzed Synthesis of 4-CF<sub>3</sub>-1,2,3-Triazoles: An Ef-fi-cient and Facile Approach via Click Reac- tion

Tinghong Tang,<sup>a</sup> Cuiting Chen,<sup>a</sup> Xin Fu,<sup>a</sup> Huilan Xu,<sup>a</sup> Luyong Wu,<sup>a,\*</sup> and  
Wenhao Chen<sup>a,\*</sup>

<sup>a</sup> Key Laboratory of Tropical Medicinal Resource Chemistry of Ministry of Education, Hainan Nor-  
mal University, Haikou 571158, P. R. China

E-mail: wuluyong@hainnu.edu.cn; 070103@hainnu.edu.cn

## Table of Contents

|                                                                                        |   |
|----------------------------------------------------------------------------------------|---|
| General information.....                                                               | 2 |
| Synthesis of starting azides.....                                                      | 2 |
| General procedure of synthesis of 4-trifluoromethyl-1,2,3-triazoles .....              | 3 |
| Procedure for gram scale reaction.....                                                 | 3 |
| The optimization reaction conditions.....                                              | 4 |
| Copies of <sup>1</sup> H NMR, <sup>19</sup> F NMR and <sup>13</sup> C NMR spectra..... | 8 |

## General information

Melting points were measured with a Beijing-Taike X-4 apparatus without corrected.  $^1\text{H}$  NMR,  $^{19}\text{F}$  NMR and  $^{13}\text{C}$  NMR spectra were recorded using Bruker Advance 400MHz or JEOL RESONANCE ECZ600R spectrometer. Chemical shifts were reported in ppm from the solvent resonance as the internal standard ( $\text{CDCl}_3$ :  $\delta_{\text{H}} = 7.26$  ppm,  $\delta_{\text{C}} = 77.16$  ppm). Coupling constants ( $J$ ) are reported in Hertz (Hz). The following abbreviations were used to describe peak splitting patterns when appropriate: s = singlet, d = doublet, dd = double doublet, ddd = double doublet of doublets, t = triplet, dt = double triplet, q = quatrilplet, m = multiplet. HRMS were obtained on LCMS-IT-TOF. Reagents were received from commercial sources. Solvents were freshly dried and degassed according to the published procedures prior to use. Isolated by column chromatography on silica gel (200~300 mesh).

## Synthesis of starting azides

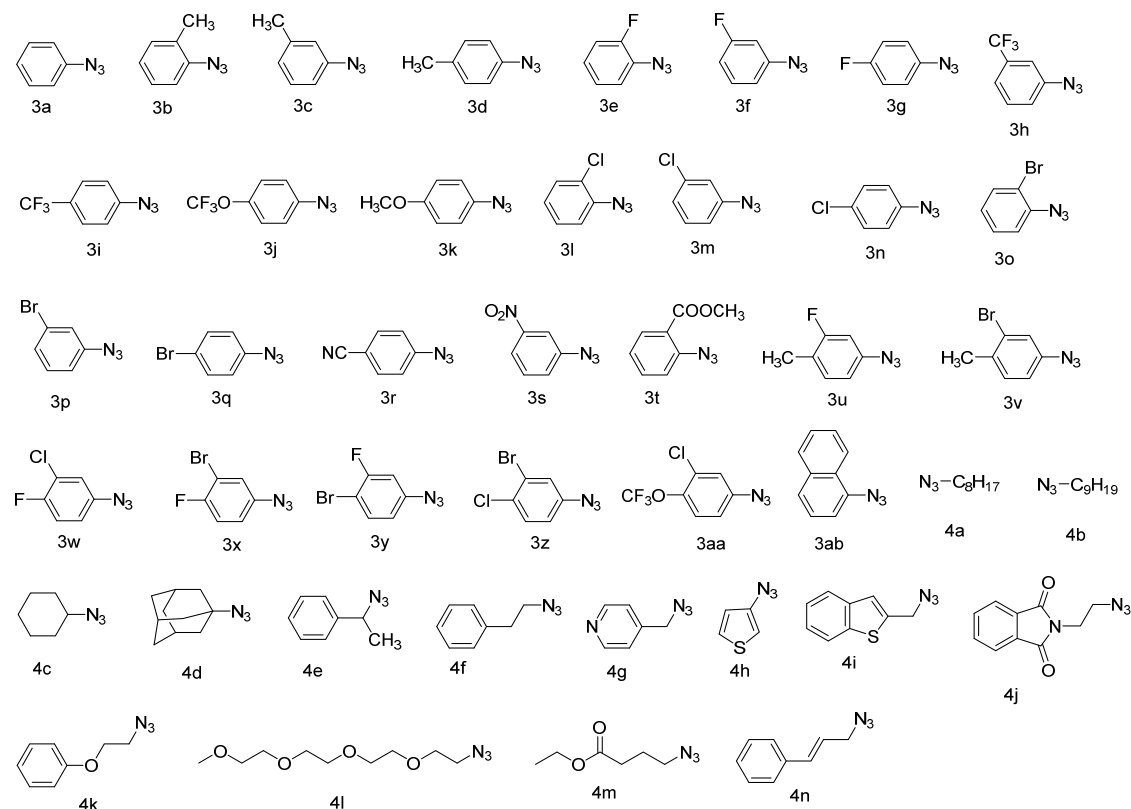

All azides used in this work were synthesized according to the reported methods.

Aromatic azides **3a-3ab** were synthesized from aromatic amines via successive diazotization and azidation.<sup>[1]</sup>; **4a-4c, 4e-4g, 4j, 4k, 4m, 4n** were prepared from corresponding bromoalkanes via nucleophilic substitution.<sup>[2]</sup>; azides **4d, 4h, 4i, 4l** were synthesized from corresponding alcohols via successive tosylation and azidation.<sup>[3]</sup>

### General procedure of synthesis of 4-trifluoromethyl-1,2,3-triazoles.

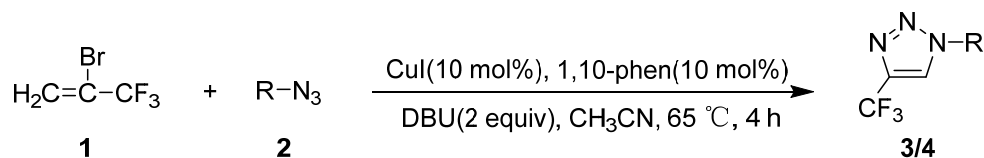

Organic azide (**2**) (0.50 mmol, 1.0 equiv), 2-bromo-3,3,3-trifluoropropylene (**1**) (219 mg, 1.25 mmol, 2.5 equiv) were prepared in 10 mL vials with stirrer drying. acetonitrile (4.0 mL) solution was added with CuI (9.5 mg, 0.05 mmol, 10 mol%), 1,10-phenanthroline (9.0 mg, 0.05 mmol, 10 mol%) and DBU (152 mg, 1.0 mmol, 2.0 equiv), sealed with a lid, and the mixture was stirred at 65° C for 4 hours. After the reaction, the mixture was diluted with ethyl acetate (30 mL) and washed with water (10 mL × 4) and salt water. The organic phase is dried with Na<sub>2</sub>SO<sub>4</sub>(anhydrous). After the solvent was removed by rotary evaporation, the residue was purified by silica gel column chromatography with petroleum ether/ethyl acetate (*V*: *V*= 20:1 - 1:1.2) as eluent to obtain 1-substituted -4-trifluoromethyl -1,2,3-triazole compounds.

### Procedure for gram scale reaction for synthesis of 1-phenyl-4-(trifluoromethyl)-1H-1,2,3-triazole (**3a**)

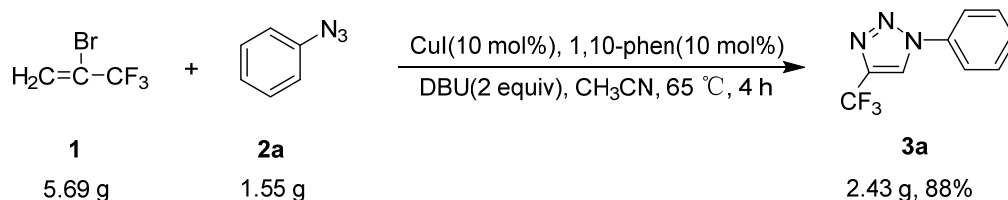

Organic azobenzene (**2a**) (1.55 g, 13.0 mmol, 1.0 equiv), 2-bromo-3,3,3-trifluoropropylene (**1**) (5.69 g, 32.5 mmol, 2.5 equiv) were prepared in 100 mL reaction bottle with agitator drying. The acetonitrile (40 mL) solution of was added to CuI (247 mg, 1.3 mmol, 10 mol%), 1,10-phenanthroline (234 mg, 1.3 mmol, 10 mol%) and DBU (3.95

g, 26 mmol, 2.0 equiv), sealed with a lid, and the mixture was stirred at 65 ° C for 4 hours. After the reaction, the mixture was diluted with ethyl acetate (150 mL) and washed with water (50 mL  $\times$  4) and salt water. The organic phase is dried with Na<sub>2</sub>SO<sub>4</sub>(anhydrous). After the solvent was removed by rotary evaporation, the residue was purified by silica gel column chromatography with petroleum ether/ethyl acetate (*V*: *V*= 20:1) as eluent to obtain 1-phenyl-4-trifluoromethyl-1,2, 3-triazole compounds.

**Table 1 Optimization of the Reaction Conditions<sup>[a]</sup>.**

Reaction scheme: 1 + 2a  $\xrightarrow[\text{Base (2 equiv), Solvent, Temp., Time.}]{[\text{Cu}] (10 \text{ mol\%}), \text{Ligand} (10 \text{ mol\%})}$  3a

| Entry | Catal.               | Ligand         | Base                                      | Solvent            | Temp<br>(°C) | Time<br>(h) | Yield(%) <sup>[b]</sup> |
|-------|----------------------|----------------|-------------------------------------------|--------------------|--------------|-------------|-------------------------|
| 1     | -                    | -              | DBU (3.5 eq.)                             | DMF                | 100          | 16          | n.d.                    |
| 2     | -                    | -              | Cs <sub>2</sub> CO <sub>3</sub> (3.5 eq.) | DMF                | 100          | 16          | n.d.                    |
| 3     | -                    | -              | K <sub>2</sub> CO <sub>3</sub> (3.5 eq.)  | DMF                | 100          | 16          | n.d.                    |
| 4     | -                    | -              | KO <sup>t</sup> Bu (3.5 eq.)              | DMF                | 100          | 16          | n.d.                    |
| 5     | -                    | -              | NaO <sup>t</sup> Bu (3.5 eq.)             | DMF                | 100          | 16          | n.d.                    |
| 6     | -                    | -              | LiO <sup>t</sup> Bu (3.5 eq.)             | DMF                | 100          | 16          | n.d.                    |
| 7     | CuI                  | -              | DBU (3.5 eq.)                             | DMF                | 80           | 16          | 47                      |
| 8     | CuBr                 | -              | DBU (3.5 eq.)                             | DMF                | 80           | 16          | 33                      |
| 9     | CuCl                 | -              | DBU (3.5 eq.)                             | DMF                | 80           | 16          | 19                      |
| 10    | CuCl                 | -              | DBU (3.5 eq.)                             | DMF                | 80           | 16          | 19                      |
| 11    | Cu(OAc) <sub>2</sub> | -              | DBU (3.5 eq.)                             | DMF                | 80           | 16          | 33                      |
| 12    | Cu(OAc) <sub>2</sub> | -              | DBU (3.5 eq.)                             | DMF                | 80           | 16          | 33                      |
| 13    | CuI (10 mol%)        | Phen (10 mol%) | DBU (3.5 eq.)                             | CH <sub>3</sub> CN | 35           | 4           | 37                      |
| 14    | CuCl (10 mol%)       | Phen (10 mol%) | DBU (3.5 eq.)                             | CH <sub>3</sub> CN | 35           | 4           | 29                      |

|    |                                                |                            |               |                    |    |    |      |
|----|------------------------------------------------|----------------------------|---------------|--------------------|----|----|------|
| 15 | CuBr (10 mol%)                                 | Phen (10 mol%)             | DBU (3.5 eq.) | CH <sub>3</sub> CN | 35 | 4  | 31   |
| 16 | CuBr <sub>2</sub> (10 mol%)                    | Phen (10 mol%)             | DBU (3.5 eq.) | CH <sub>3</sub> CN | 35 | 4  | 22   |
| 17 | CuSCN (10 mol%)                                | Phen (10 mol%)             | DBU (3.5 eq.) | CH <sub>3</sub> CN | 35 | 4  | 30   |
| 18 | CuSO <sub>4</sub> ·5H <sub>2</sub> O (10 mol%) | Phen (10 mol%)             | DBU (3.5 eq.) | CH <sub>3</sub> CN | 35 | 4  | 20   |
| 19 | CuI (10 mol%)                                  | Phen (10 mol%)             | DBU (3.5 eq.) | CH <sub>3</sub> CN | 50 | 4  | 76   |
| 20 | CuI (10 mol%)                                  | Phen (10 mol%)             | DBU (3.5 eq.) | CH <sub>3</sub> CN | 65 | 4  | 95   |
| 21 | CuI (10 mol%)                                  | Phen (10 mol%)             | DBU (3.5 eq.) | DMF                | 65 | 4  | 94   |
| 22 | CuI (10 mol%)                                  | Phen (10 mol%)             | DBU (3.5 eq.) | DMSO               | 65 | 4  | 51   |
| 23 | CuI (10 mol%)                                  | Phen (10 mol%)             | DBU (3.5 eq.) | NMP                | 65 | 4  | 56   |
| 24 | CuI (10 mol%)                                  | Phen (10 mol%)             | DBU (3.5 eq.) | THF                | 65 | 4  | 18   |
| 25 | CuI (10 mol%)                                  | Phen (10 mol%)             | DBU (3.5 eq.) | Toluene            | 65 | 4  | n.d. |
| 26 | CuI (10 mol%)                                  | TMEDA (10 mol%)            | DBU (3.5 eq.) | CH <sub>3</sub> CN | 65 | 4  | 75   |
| 27 | CuI (10 mol%)                                  | Pyr. (10 mol%)             | DBU (3.5 eq.) | CH <sub>3</sub> CN | 65 | 4  | 57   |
| 28 | CuI (10 mol%)                                  | PPh <sub>3</sub> (10 mol%) | DBU (3.5 eq.) | CH <sub>3</sub> CN | 65 | 4  | 15   |
| 29 | CuI (10 mol%)                                  | L1 (10 mol%)               | DBU (3.5 eq.) | CH <sub>3</sub> CN | 65 | 4  | 15   |
| 30 | CuI (10 mol%)                                  | Phen (10 mol%)             | DBU (3.5 eq.) | CH <sub>3</sub> CN | 50 | 10 | 87   |
| 31 | CuI (10 mol%)                                  | Phen (10 mol%)             | DBU (3.5 eq.) | CH <sub>3</sub> CN | 65 | 3  | 93   |
| 32 | CuI (10 mol%)                                  | Phen (10 mol%)             | DBU(3.5 eq.)  | CH <sub>3</sub> CN | 65 | 2  | 79   |
| 33 | CuI (10 mol%)                                  | Phen (10 mol%)             | DBU(3.5 eq.)  | CH <sub>3</sub> CN | 75 | 4  | 92   |
| 34 | CuCl(10 mol%)                                  | Phen (10 mol%)             | DBU (3.5 eq.) | CH <sub>3</sub> CN | 65 | 4  | 91   |
| 35 | CuCl <sub>2</sub> ·2H <sub>2</sub> O (10 mol%) | Phen (10 mol%)             | DBU (3.5 eq.) | CH <sub>3</sub> CN | 65 | 4  | 80   |

|    |                                |                |                                           |                    |    |   |    |
|----|--------------------------------|----------------|-------------------------------------------|--------------------|----|---|----|
| 36 | CuBr (10 mol%)                 | Phen (10 mol%) | DBU (3.5 eq.)                             | CH <sub>3</sub> CN | 65 | 4 | 88 |
| 37 | CuBr <sub>2</sub> (10 mol%)    | Phen (10 mol%) | DBU (3.5 eq.)                             | CH <sub>3</sub> CN | 65 | 4 | 76 |
| 38 | Cu(OAc) <sub>2</sub> (10 mol%) | Phen (10 mol%) | DBU (3.5 eq.)                             | CH <sub>3</sub> CN | 65 | 4 | 91 |
| 39 | CuSCN (10 mol%)                | Phen (10 mol%) | DBU (3.5 eq.)                             | CH <sub>3</sub> CN | 65 | 4 | 90 |
| 40 | CuI (10 mol%)                  | L2 (10 mol%)   | DBU (3.5 eq.)                             | CH <sub>3</sub> CN | 65 | 4 | 93 |
| 41 | CuI (10 mol%)                  | L3 (10 mol%)   | DBU (3.5 eq.)                             | CH <sub>3</sub> CN | 65 | 4 | 93 |
| 42 | CuI (10 mol%)                  | —              | DBU (3.5 eq.)                             | CH <sub>3</sub> CN | 65 | 4 | 69 |
| 43 | CuI (10 mol%)                  | Phen (10 mol%) | DBU(2.0 eq.)                              | CH <sub>3</sub> CN | 65 | 4 | 95 |
| 44 | CuI (10 mol%)                  | Phen (10 mol%) | Cs <sub>2</sub> CO <sub>3</sub> (2.0 eq.) | CH <sub>3</sub> CN | 65 | 4 | 0  |
| 45 | CuI (10 mol%)                  | Phen (10 mol%) | K <sub>2</sub> CO <sub>3</sub> (2.0 eq.)  | CH <sub>3</sub> CN | 65 | 4 | 0  |
| 46 | CuI (10 mol%)                  | Phen (10 mol%) | K <sub>3</sub> PO <sub>4</sub> (2.0 eq.)  | CH <sub>3</sub> CN | 65 | 4 | 0  |
| 47 | CuI (10 mol%)                  | Phen (10 mol%) | KOH (2.0 eq.)                             | CH <sub>3</sub> CN | 65 | 4 | 50 |
| 48 | CuI (10 mol%)                  | Phen (10 mol%) | LiO <sup>t</sup> Bu (2.0 eq.)             | CH <sub>3</sub> CN | 65 | 4 | 0  |
| 49 | CuI (10 mol%)                  | Phen (10 mol%) | NaO <sup>t</sup> Bu (2.0 eq.)             | CH <sub>3</sub> CN | 65 | 4 | 38 |
| 50 | CuI (10 mol%)                  | Phen (10 mol%) | KO <sup>t</sup> Bu (2.0 eq.)              | CH <sub>3</sub> CN | 65 | 4 | 51 |
| 51 | CuI (10 mol%)                  | Phen (10 mol%) | TBD (2.0 eq.)                             | CH <sub>3</sub> CN | 65 | 4 | 56 |
| 52 | CuI (10 mol%)                  | Phen (10 mol%) | Et <sub>3</sub> N (2.0 eq.)               | CH <sub>3</sub> CN | 65 | 4 | 0  |
| 53 | CuI (5mol%)                    | Phen (10 mol%) | DBU (2.0 eq.)                             | CH <sub>3</sub> CN | 65 | 4 | 90 |

<sup>[a]</sup> Reaction conditions: **1** (1.25 mmol, 2.5 equiv), **2 a** (0.5 mmol, 1.0 equiv), Ligand (10 mol%), Solvent (4.0 mL); L1 = 2,2'-Bi-4-picoline; L2 = 4,7-diCH<sub>3</sub>O- phen; L3 = 3,4,7,8-tetra-CH<sub>3</sub>-phen.

<sup>[b]</sup> Isolated yields.

## References:

- [1] a) Benati, L.; Bencivenni, G.; Leardini, R.; Minozzi, M.; Nanni, D.; Scialpi, R.; Spagnolo, P.; Zanardi, G. Radical Reduction of Aromatic Azides to Amines with Triethylsilane. *J. Org. Chem.* **2006**, *71*, 5822–5825; b) Zeng, L.; Li, J.; Cui, S. Rhodium-Catalyzed Atroposelective Click Cycloaddition of Azides and Alkynes. *Angew. Chem. Int. Ed.* **2022**, *61*, e202205037.
- [2] a) Alvarez, S.G.; Alvarez, M.T. A Practical Procedure for the Synthesis of Alkyl Azides at Ambient Temperature in Dimethyl Sulfoxide in High Purity and Yield. *Synthesis* **1997**, *1997*, 413–414; b) Barbosa, F.C.; Oliveira RN, D. Synthesis of a new class of triazole-linked benzoheterocycles via 1,3-dipolar cycloaddition. *J. Braz. Chem. Soc.* **2011**, *22*, 592–597; c) Sallustra, A.; Bregant, S.; Chollet, C.; Audisio, D.; Taran, F. Scalable and practical synthesis of clickable Cu-chelating azides. *Chem. Comm.* **2017**, *53*, 7890–7893; d) Piccinno, M.; Aragay, G.; Mihan, F.Y.; Ballester, P.; Dalla Cort, A. Unexpected Emission Properties of a 1,8-Naphthalimide Unit Covalently Appended to a Zn–Salophen. *Eur. J. Inorg. Chem.* **2015**, *2015*, 2664–2670; e) Wu, X.; Wu, W.; Cui, X.; Zhao, J.; Wu, M. Preparation of Bodipy–ferrocene dyads and modulation of the singlet/triplet excited state of bodipy via electron transfer and triplet energy transfer. *J. Mater. Chem. C.* **2016**, *4*, 2843–2853.
- [3] a) Añón, E.; Costero, A.M.; Gaviña, P.; Parra, M.; El Haskouri, J.; Amorós, P.; Martínez-Máñez, R.; Sancenón, F. Not always what closes best opens better: Mesoporous nanoparticles capped with organic gates. *Sci. Technol. Adv. Mat.* **2019**, *20*, 699–709; b) Siles, R.; Kawasaki, Y.; Ross, P.; Freire, E. Synthesis and biochemical evaluation of triazole/tetrazole-containing sulfonamides against thrombin and related serine proteases. *Bioorg. Med. Chem. Lett.* **2011**, *21*, 5305–5309; c) Peroković, V. P., Car, Ž., Draženović, J., Stojković, R., Milković, L., Antica, M.; Škalamera, Đ.; Tomić, S.; Ribić, R. Design, Synthesis, and Biological Evaluation of Desmuramyl Dipeptides Modified by Adamantyl-1,2,3-triazole. *Molecules* **2021**, *26*, 6352.

Copies of  $^1\text{H}$  NMR,  $^{19}\text{F}$  NMR and  $^{13}\text{C}$  NMR spectra

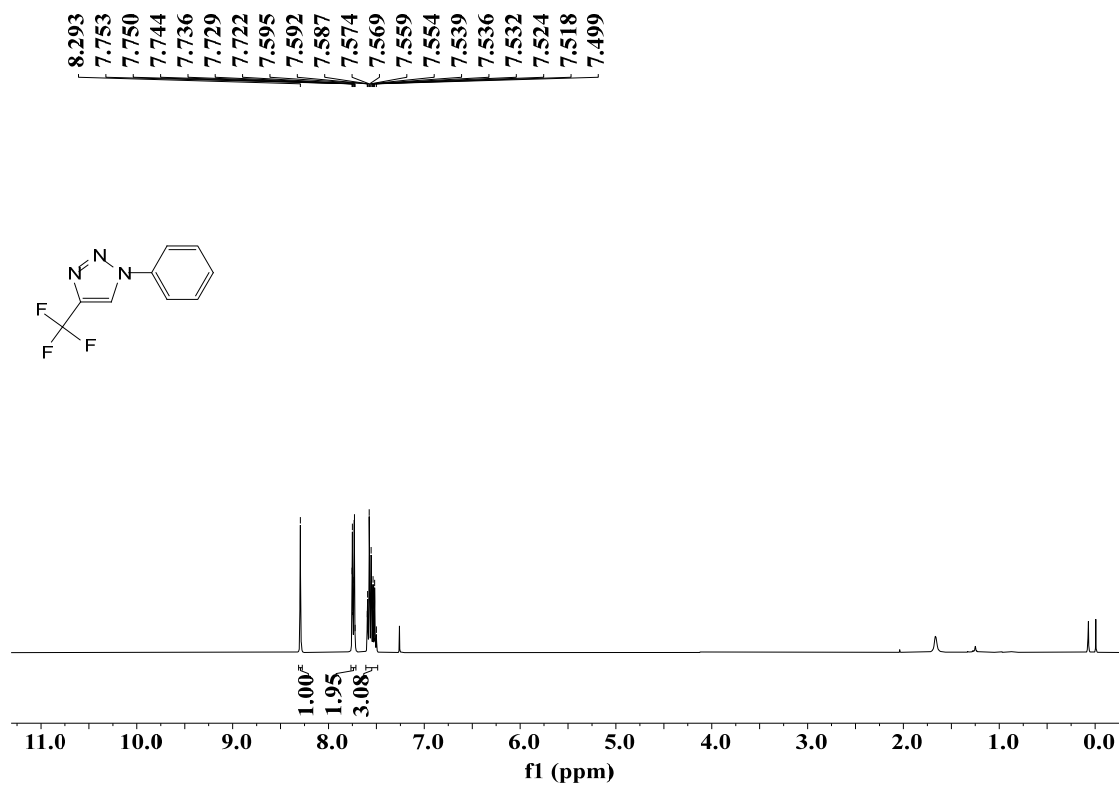

3a- $^1\text{H}$  NMR

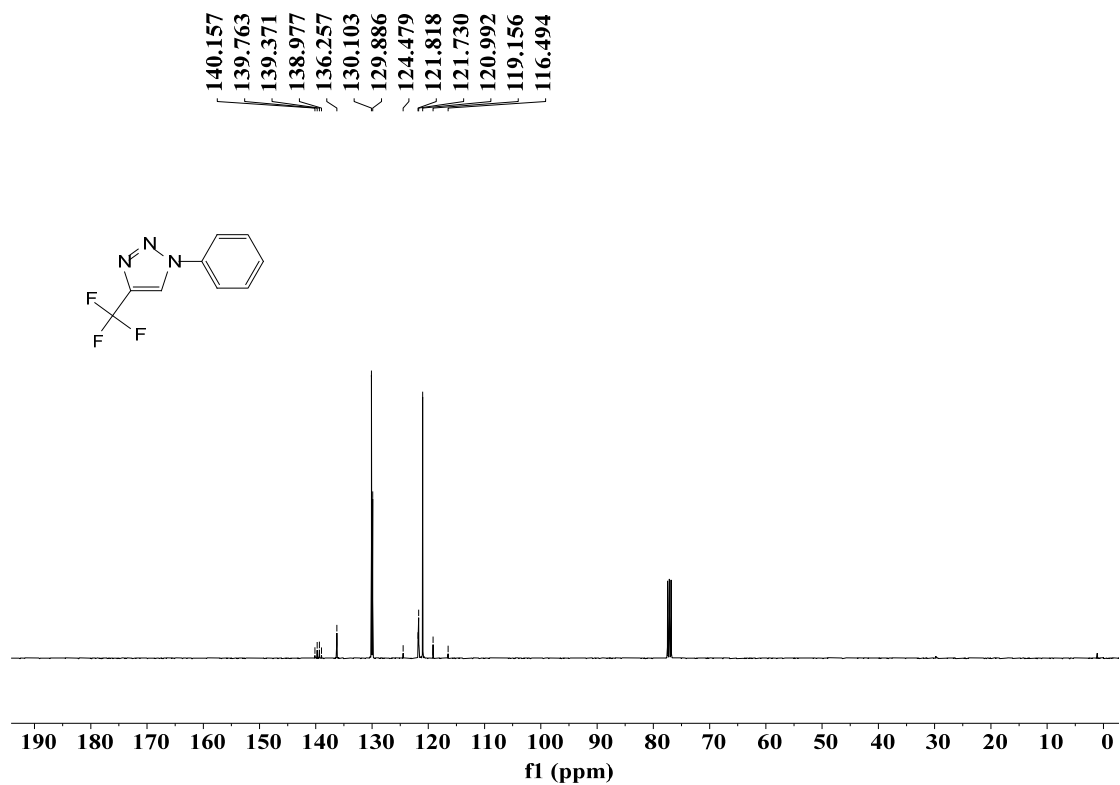



**3a-<sup>13</sup>C NMR**

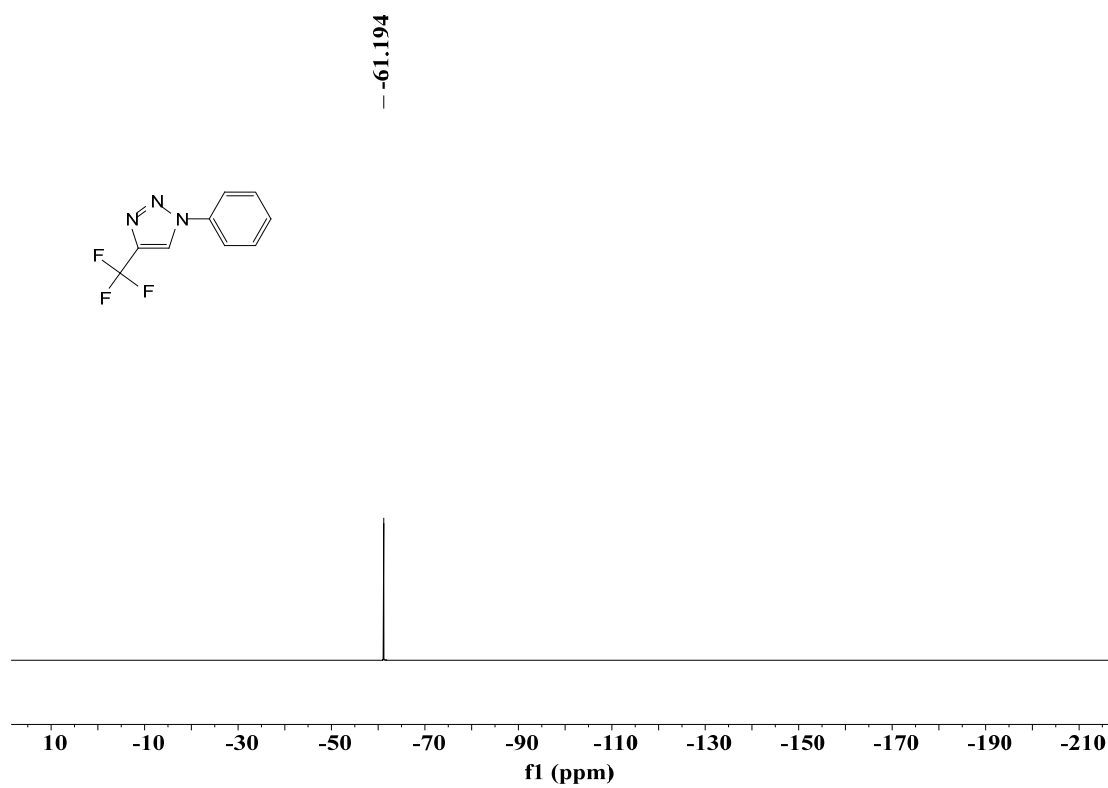

**3a-<sup>19</sup>F NMR**

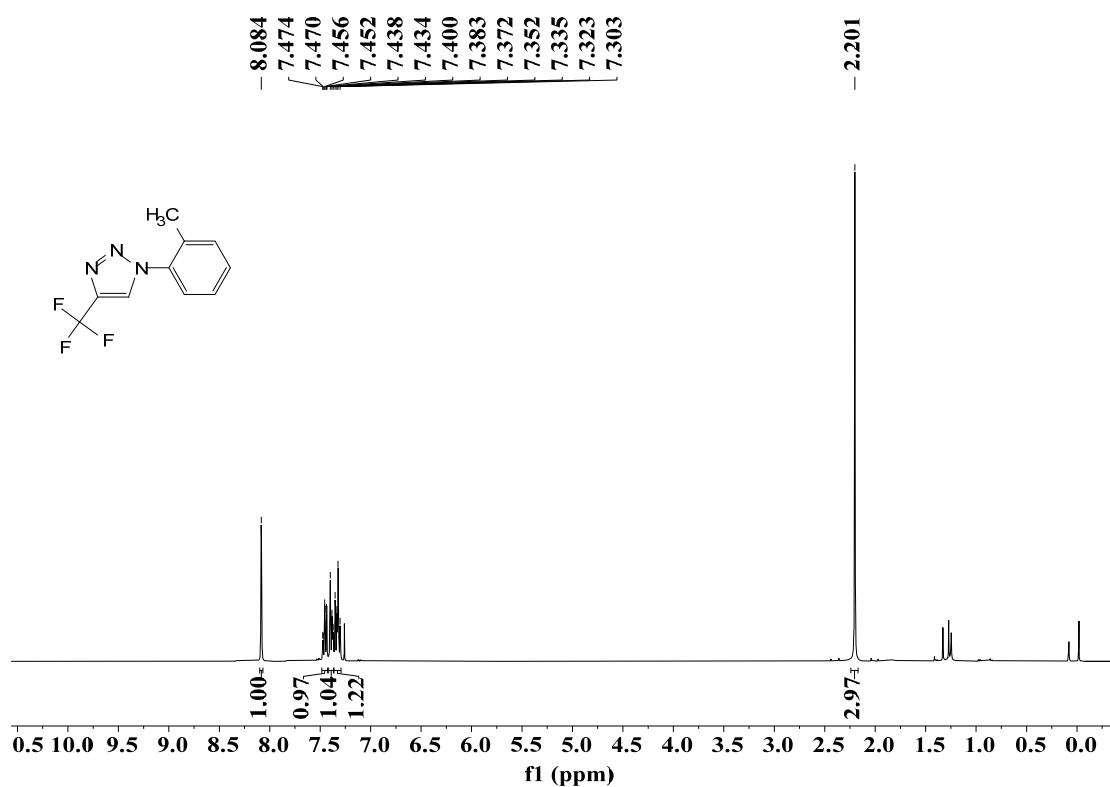

**3b-<sup>1</sup>H NMR**

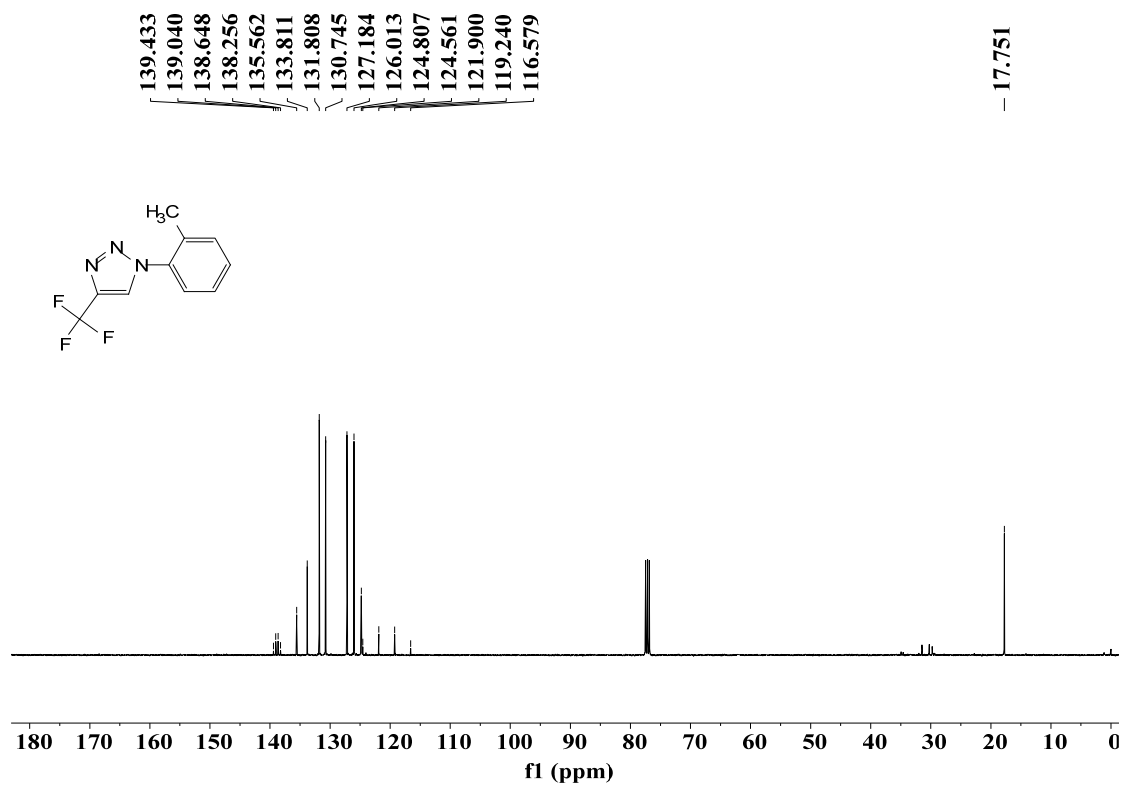

**3b-<sup>13</sup>C NMR**

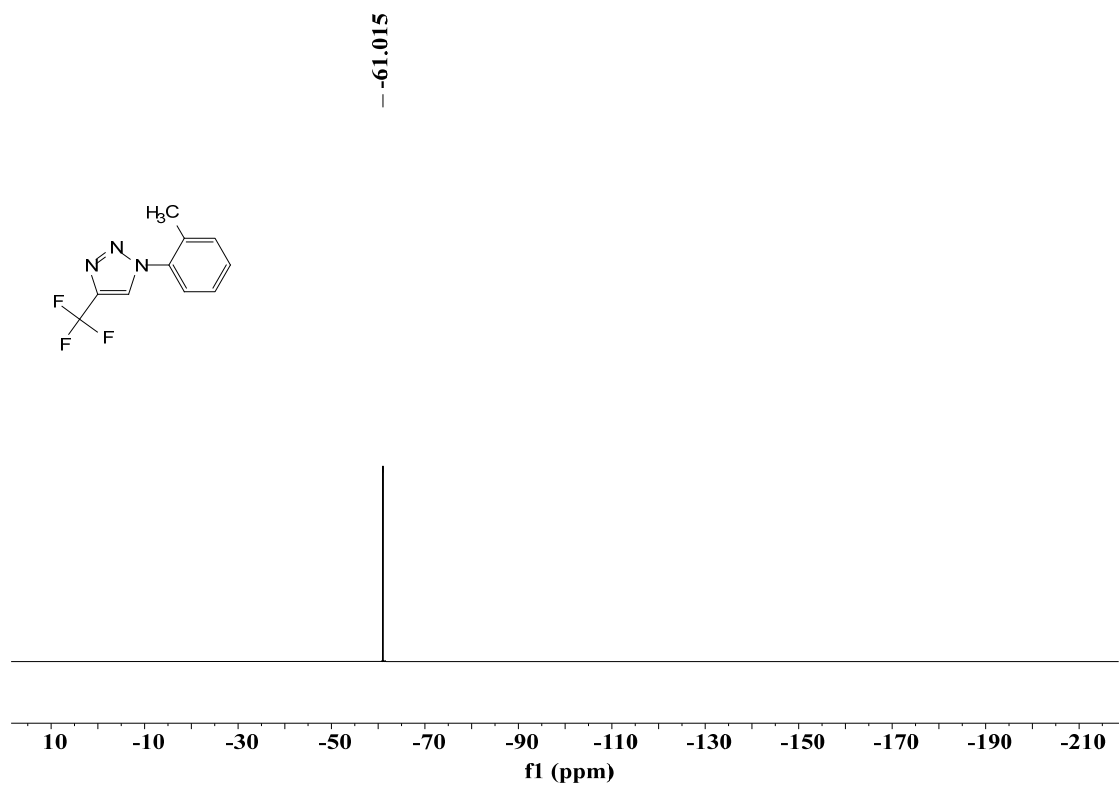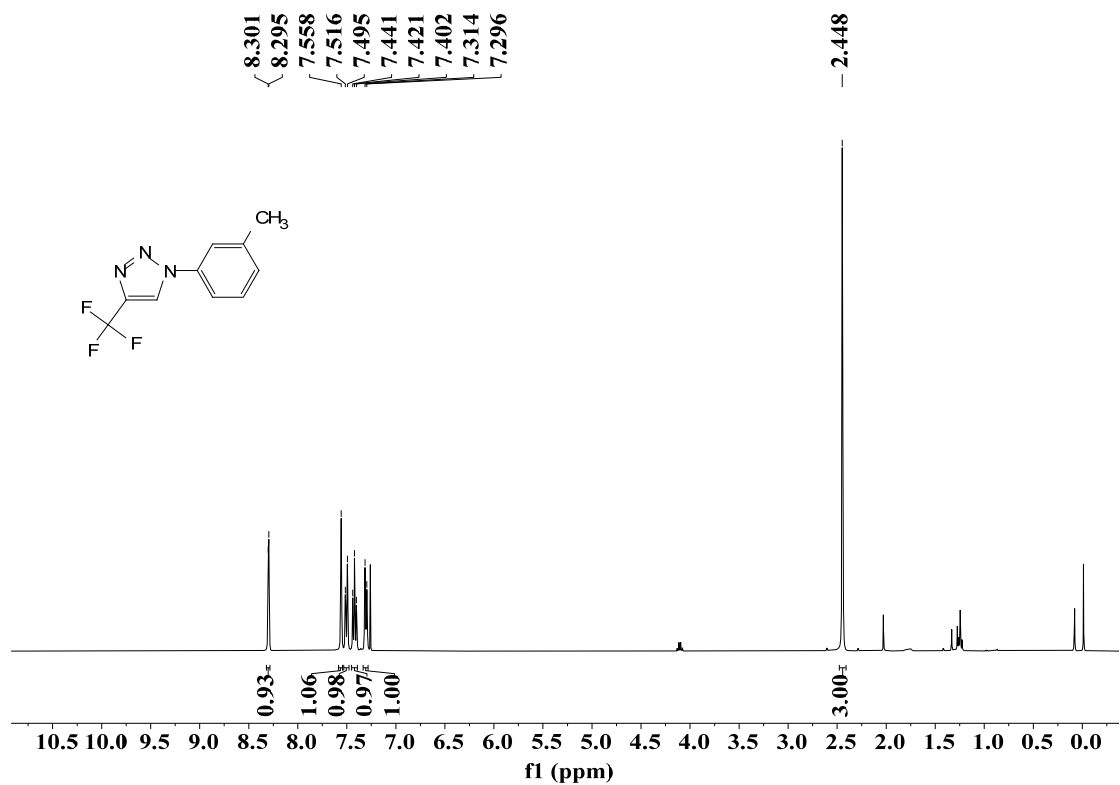

# **3c-<sup>1</sup>H NMR**

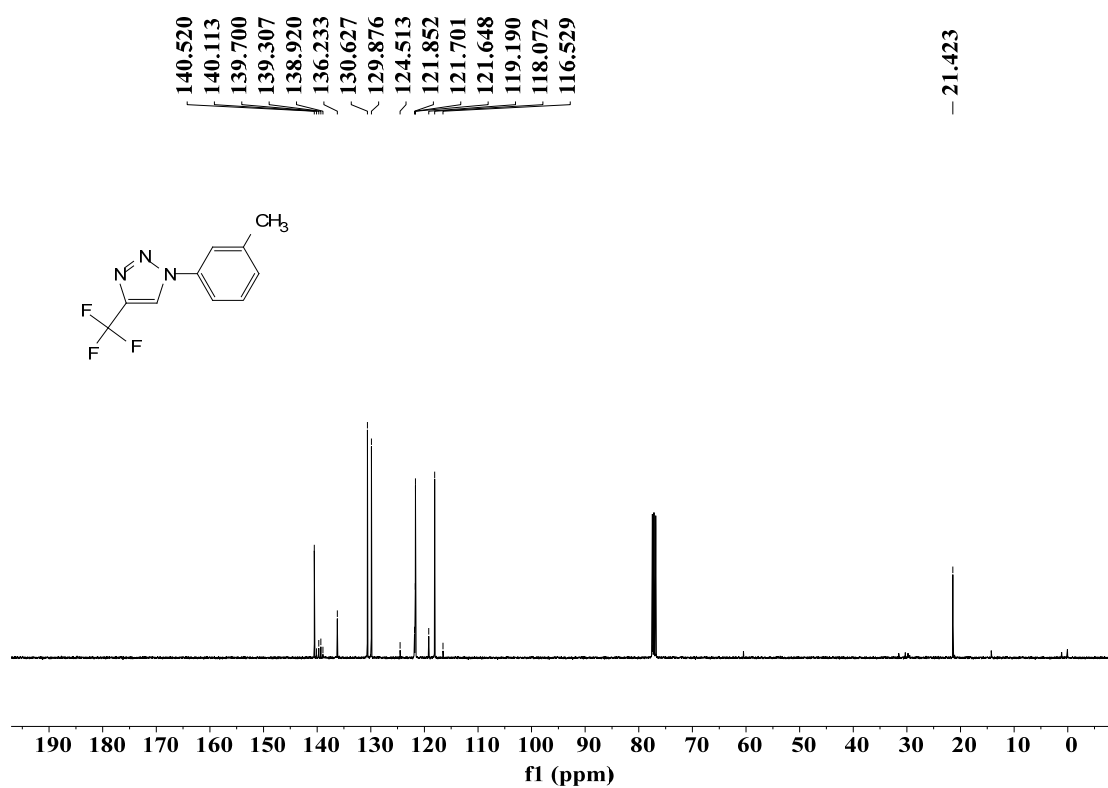

## **3c-<sup>13</sup>C NMR**

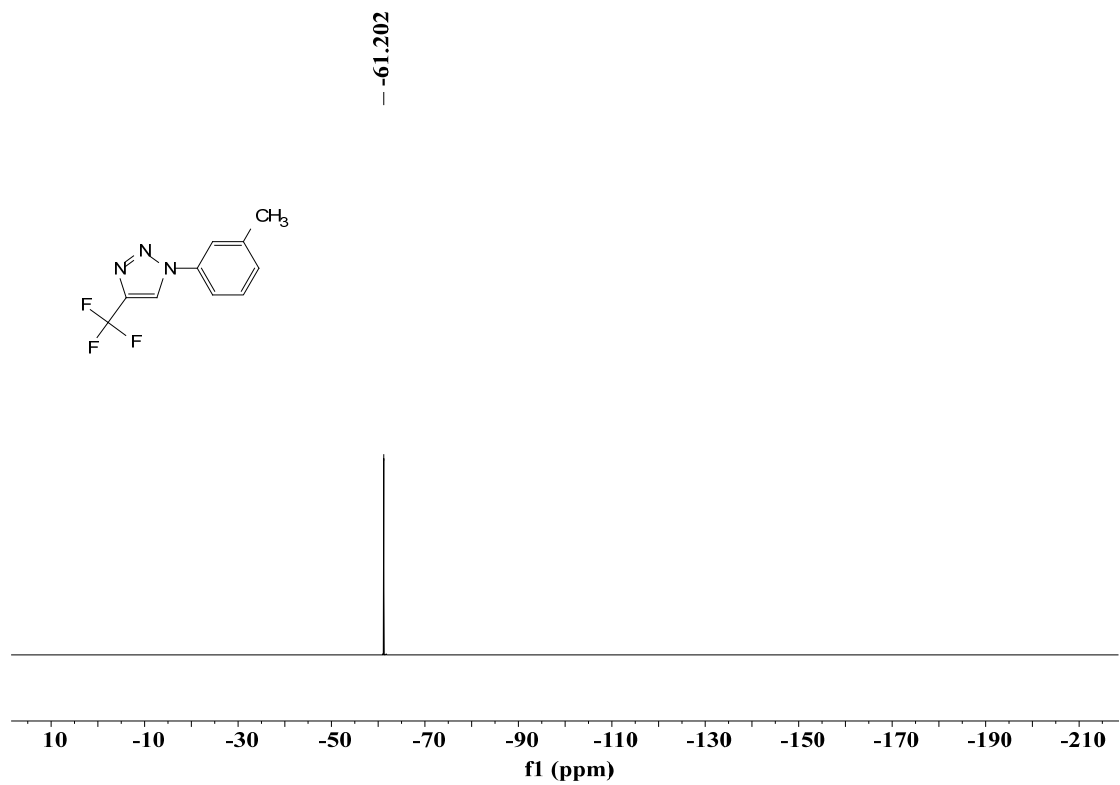

3c-<sup>19</sup>F NMR

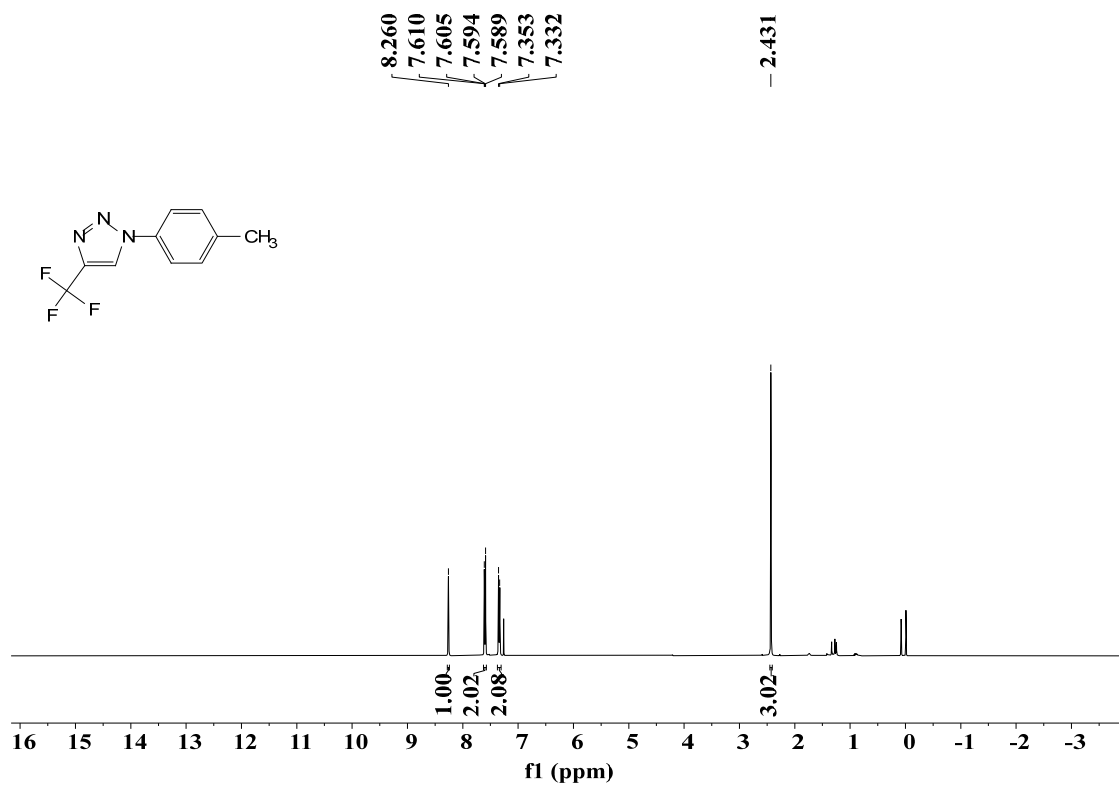

3d-<sup>1</sup>H NMR

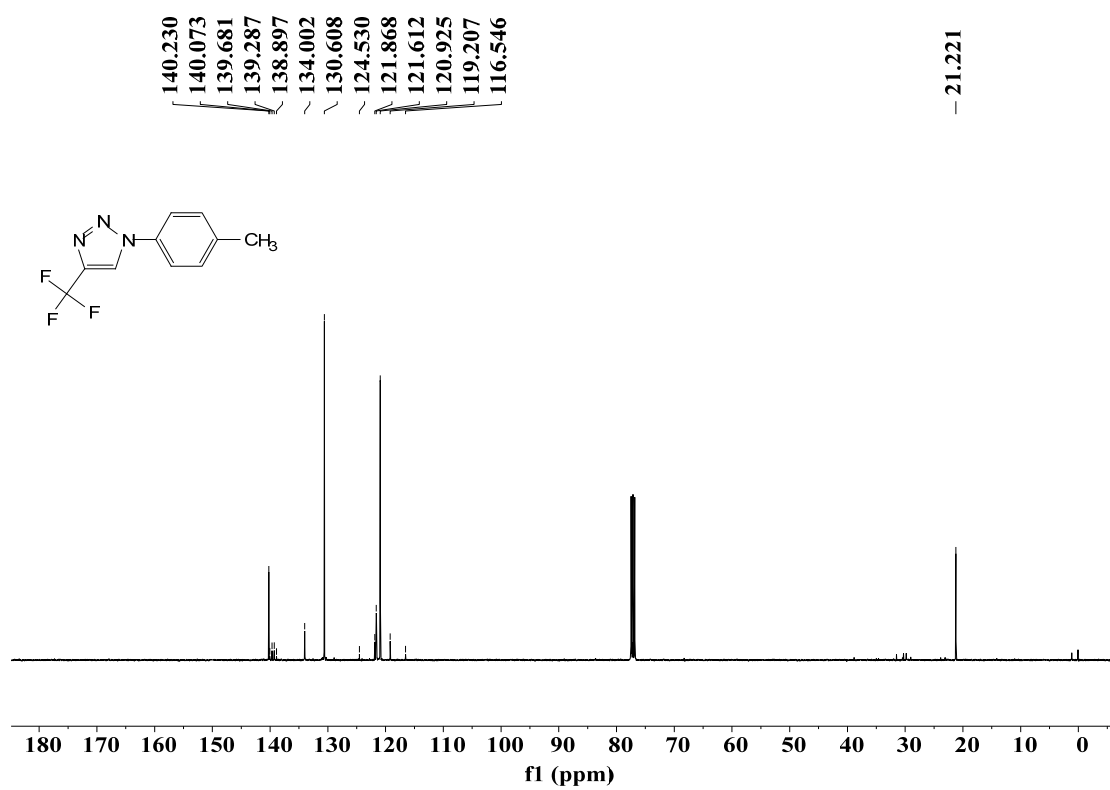

3d-<sup>13</sup>C NMR

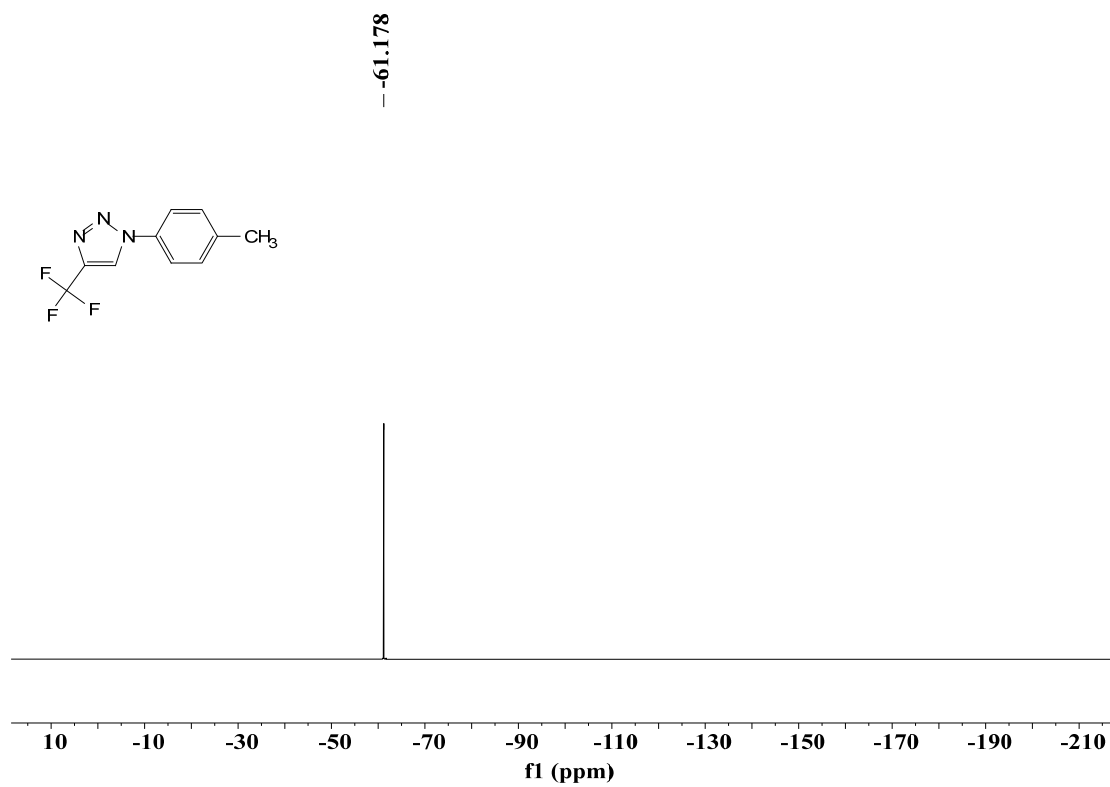

3d-<sup>19</sup>F NMR

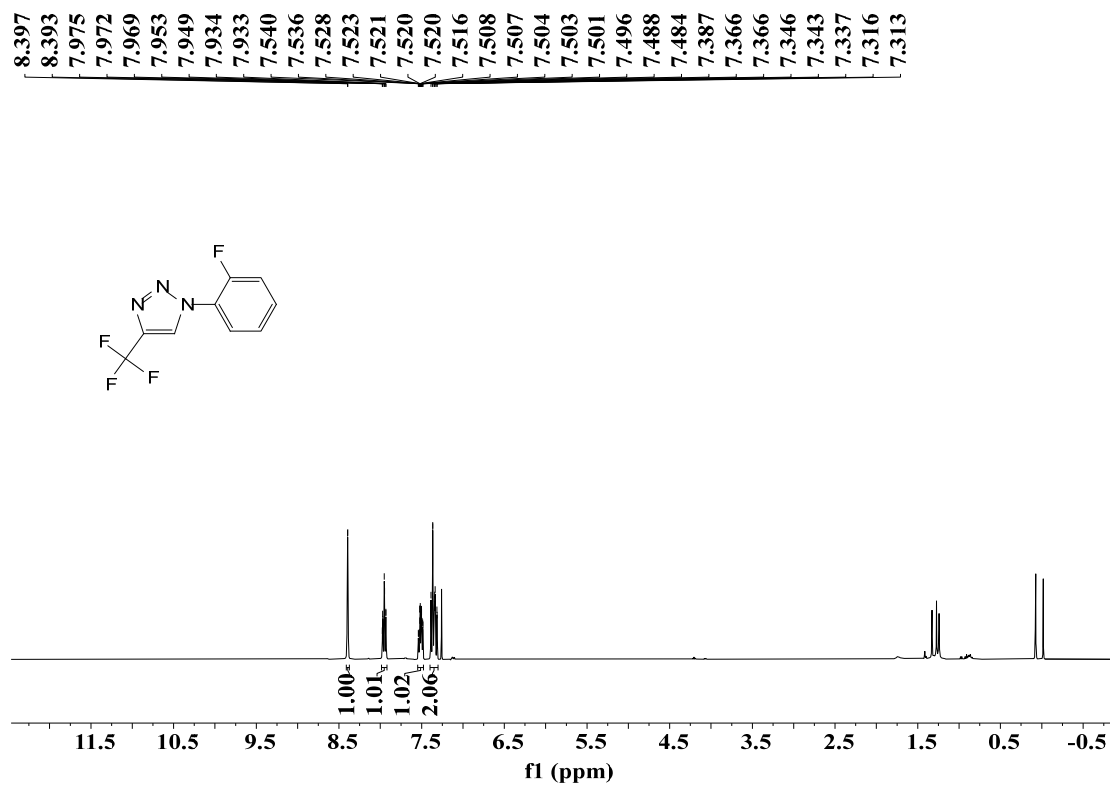

3e-<sup>1</sup>H NMR

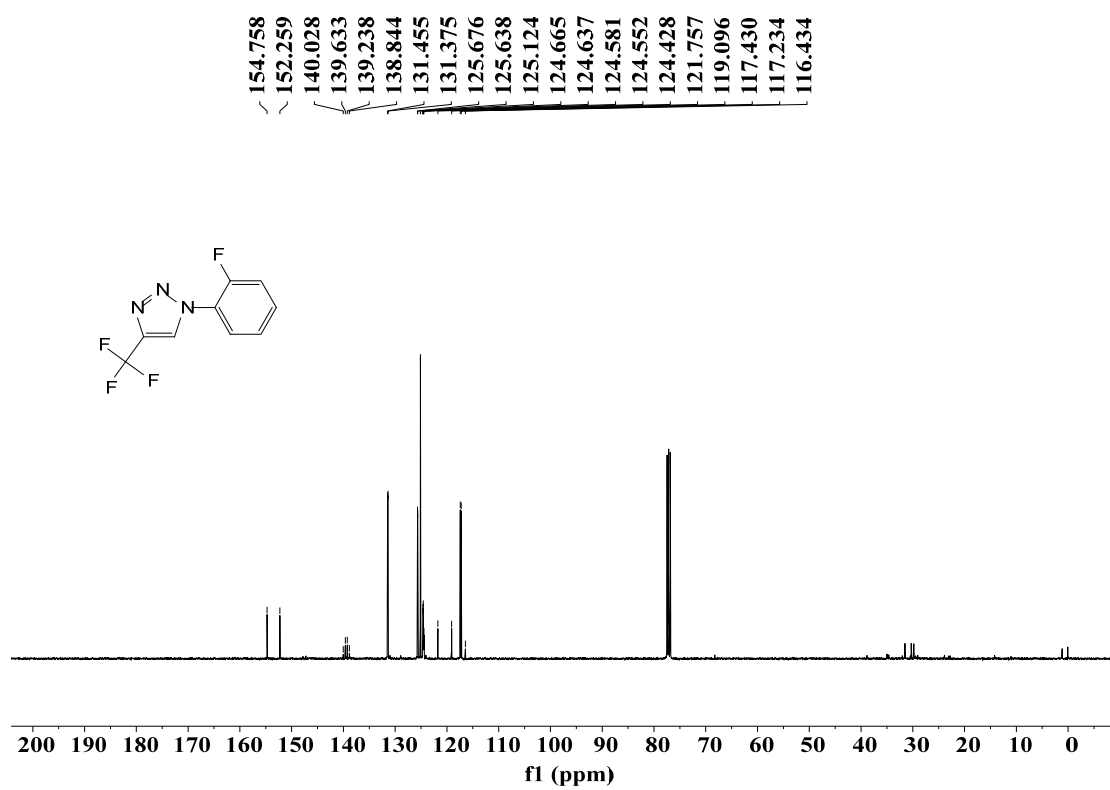

$3e^{-13}\text{C}$  NMR



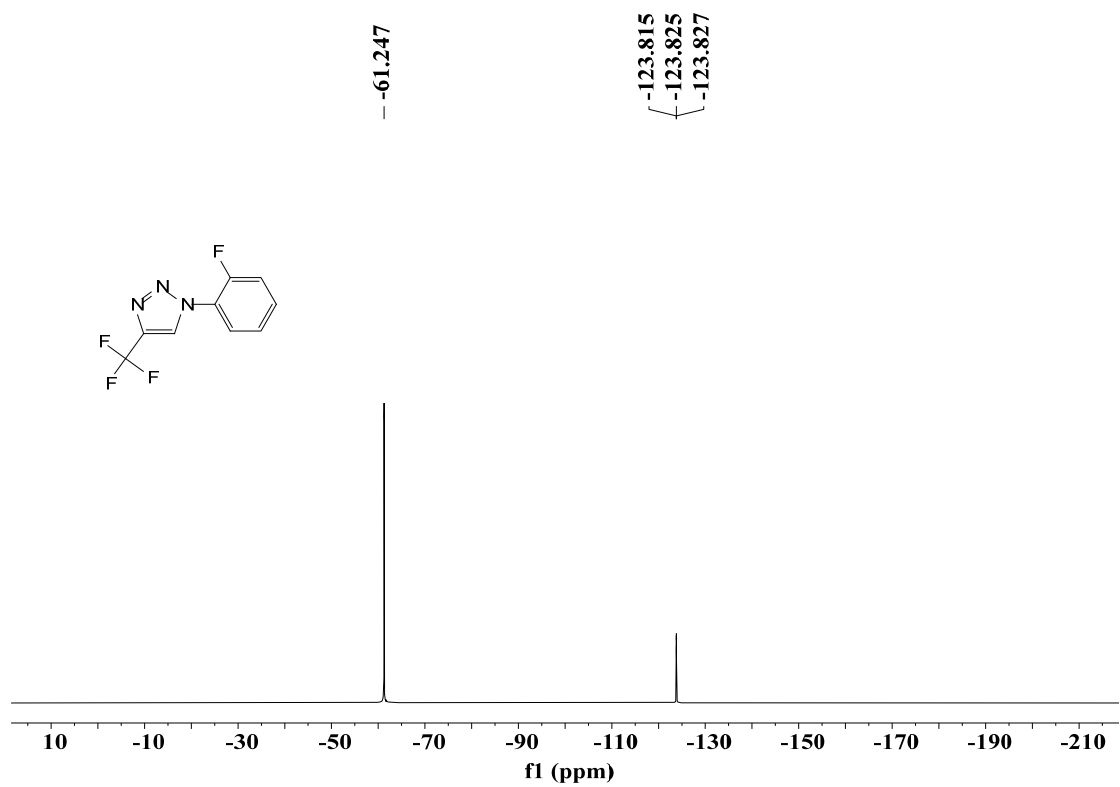

$3\text{e-}^{19}\text{F}$  NMR

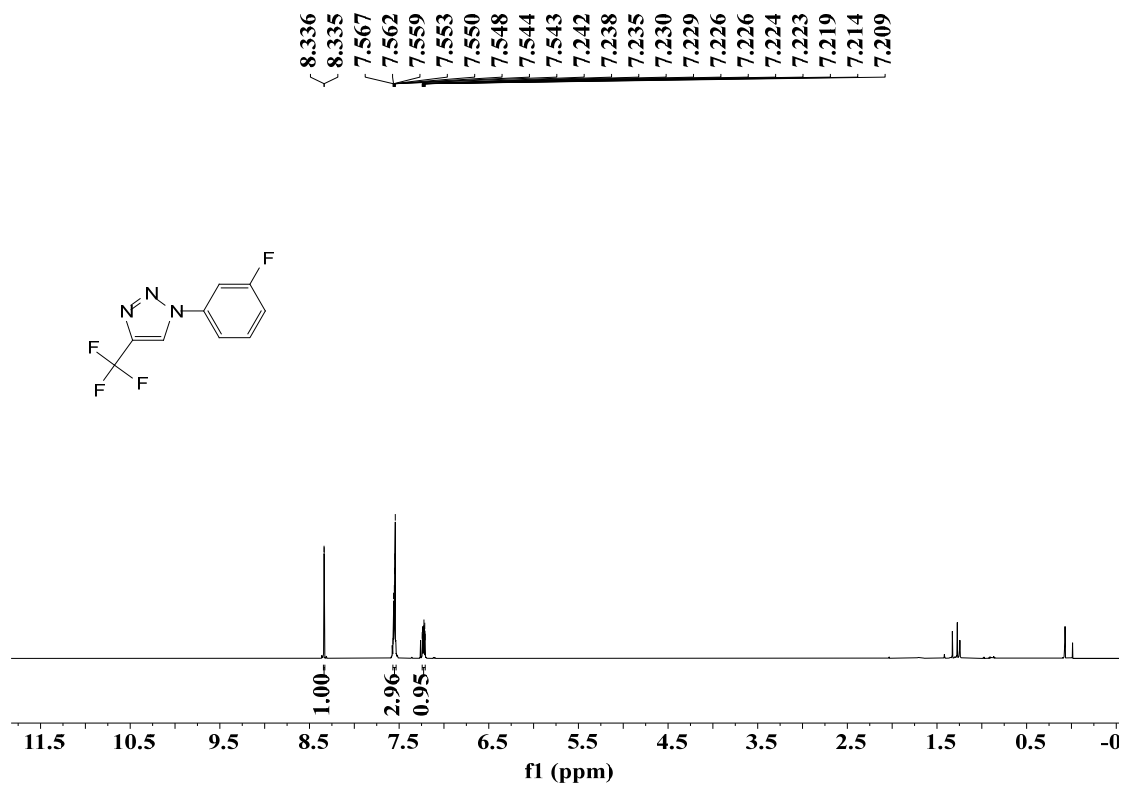

$3\text{f-}^1\text{H}$  NMR

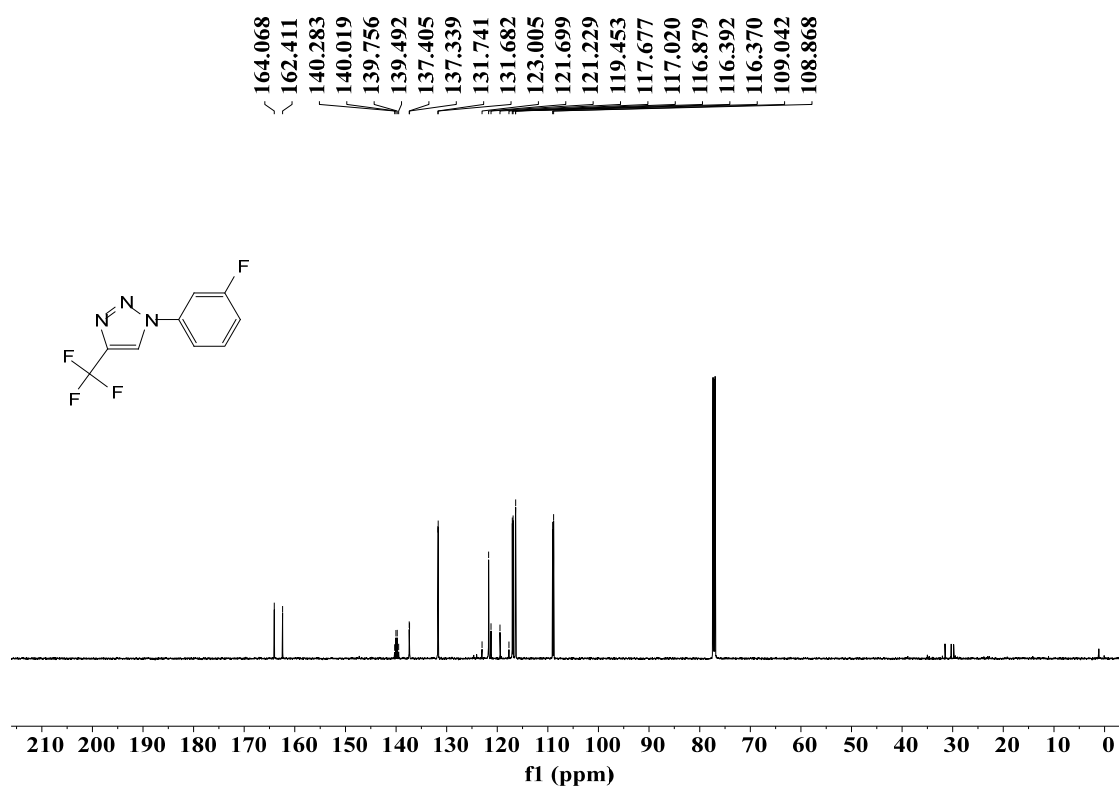

3f- $^{13}\text{C}$  NMR

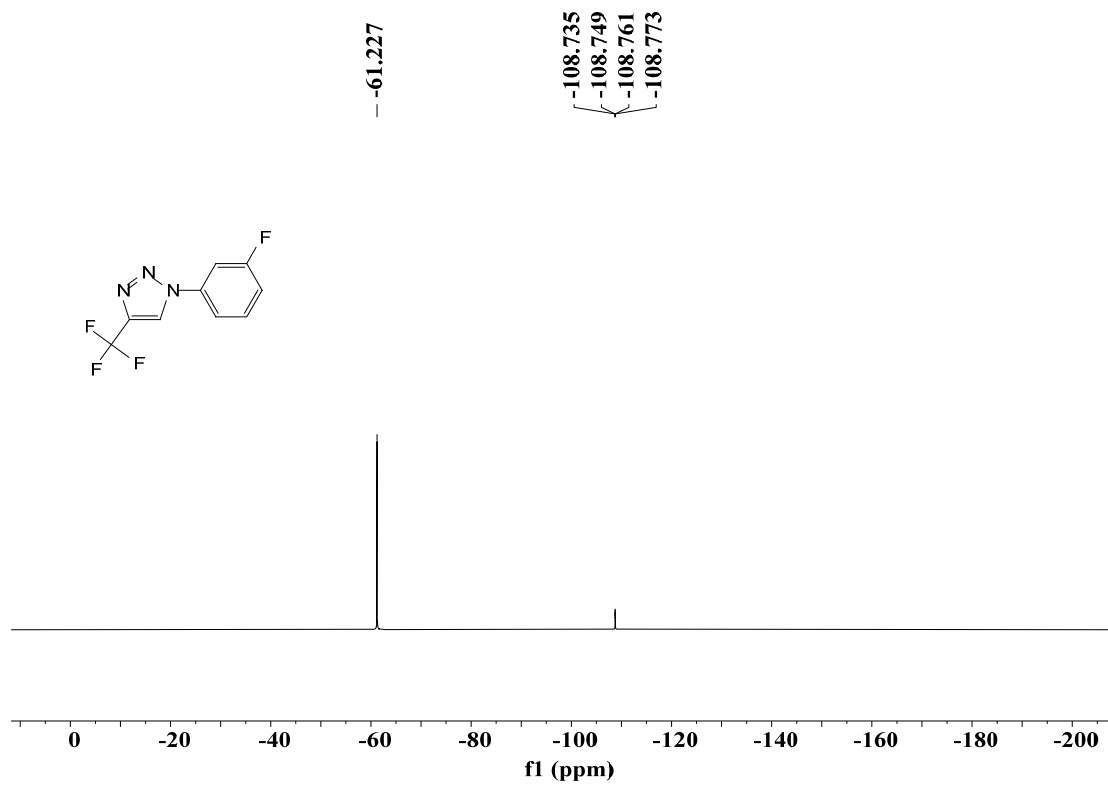

3f- $^{19}\text{F}$  NMR

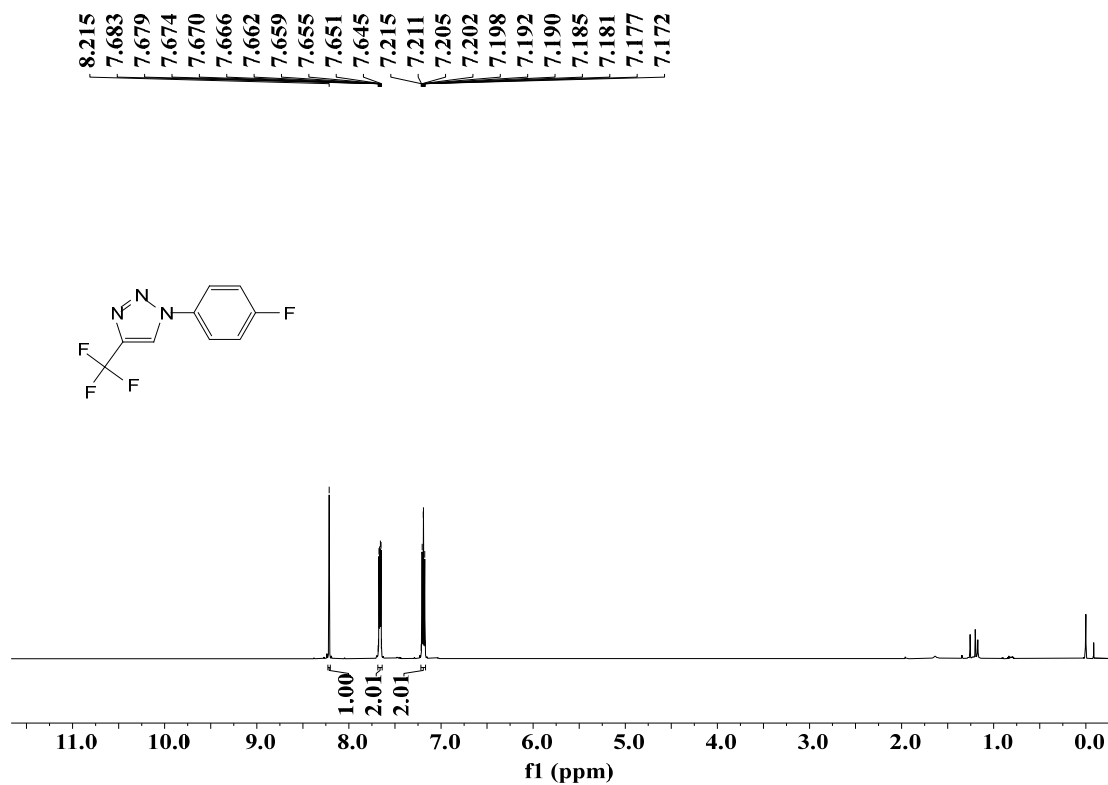

3g- $^1\text{H}$  NMR

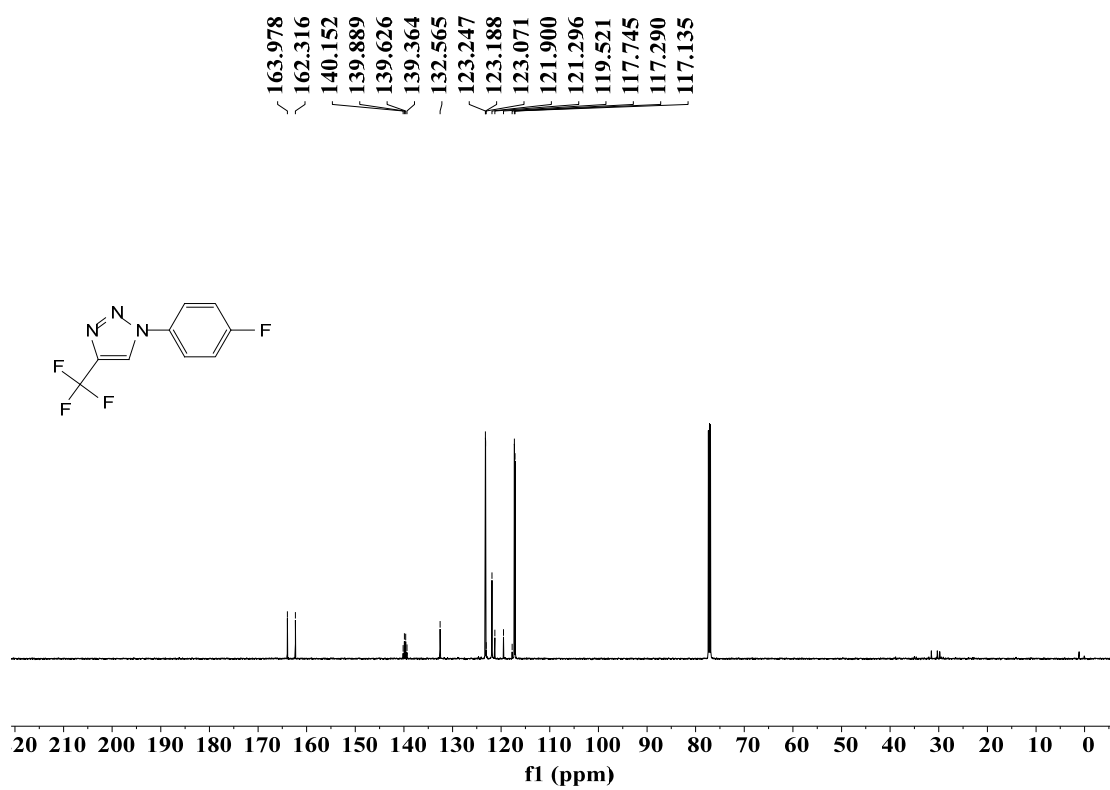

3g-<sup>13</sup>C NMR

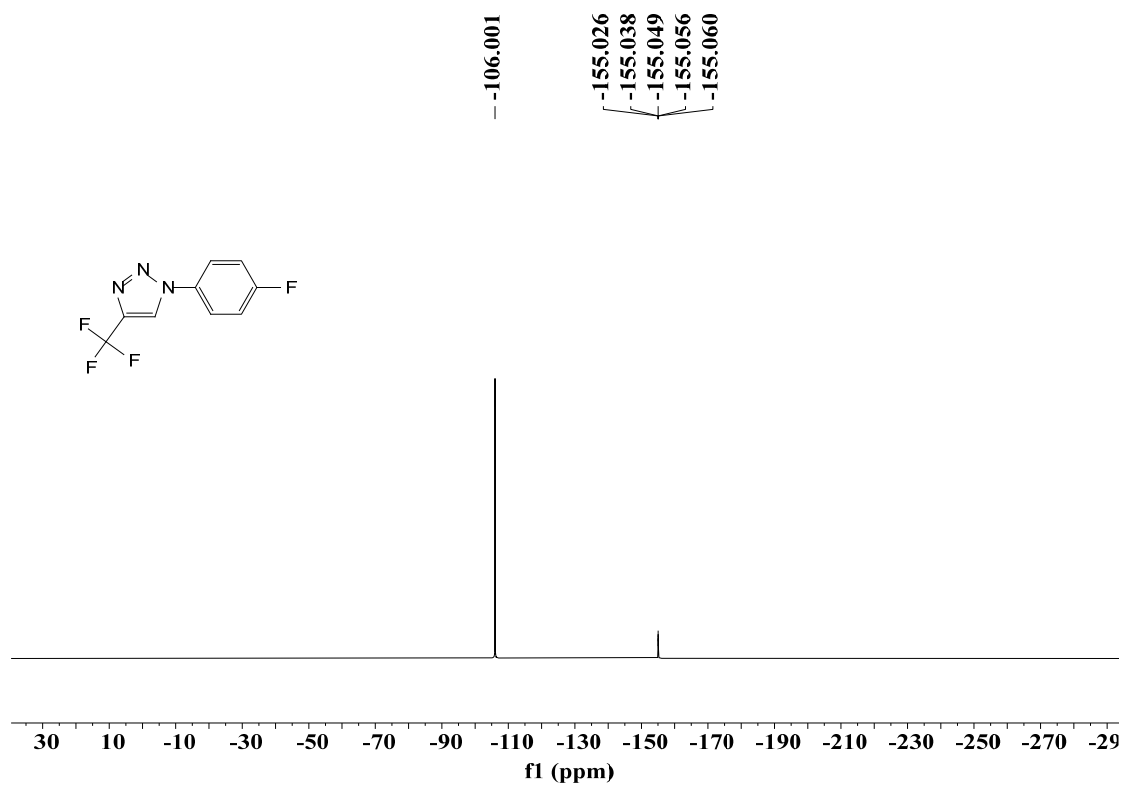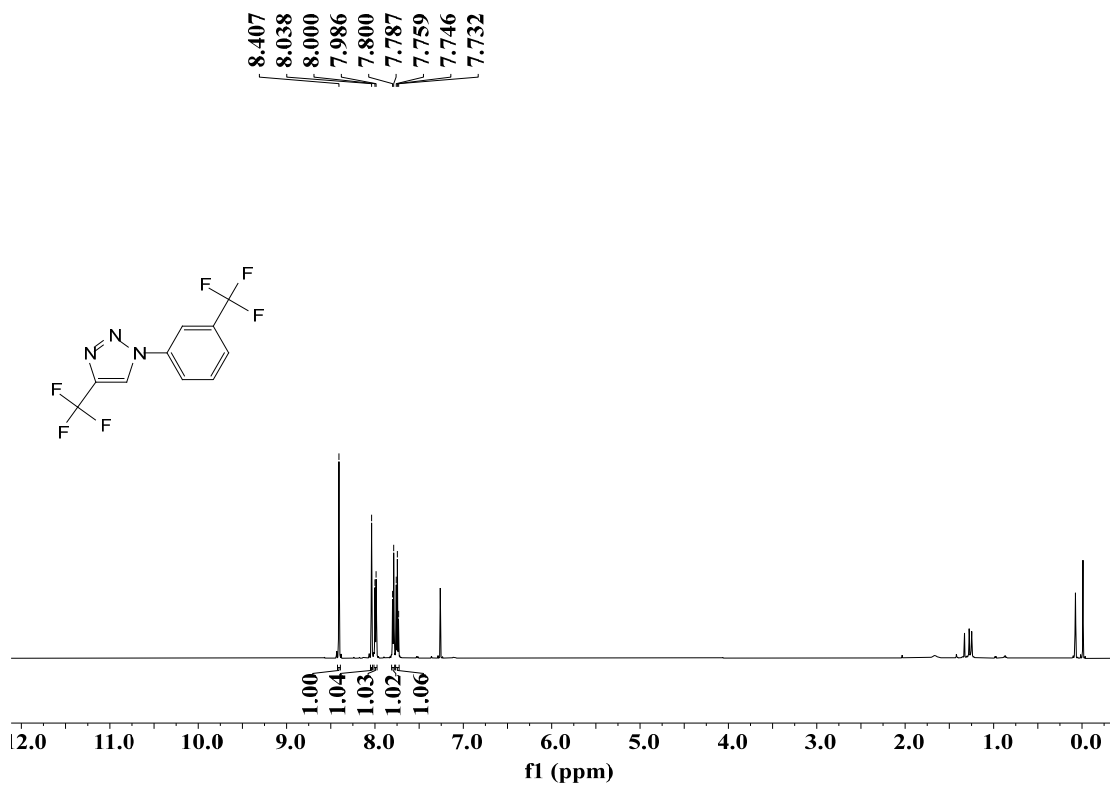

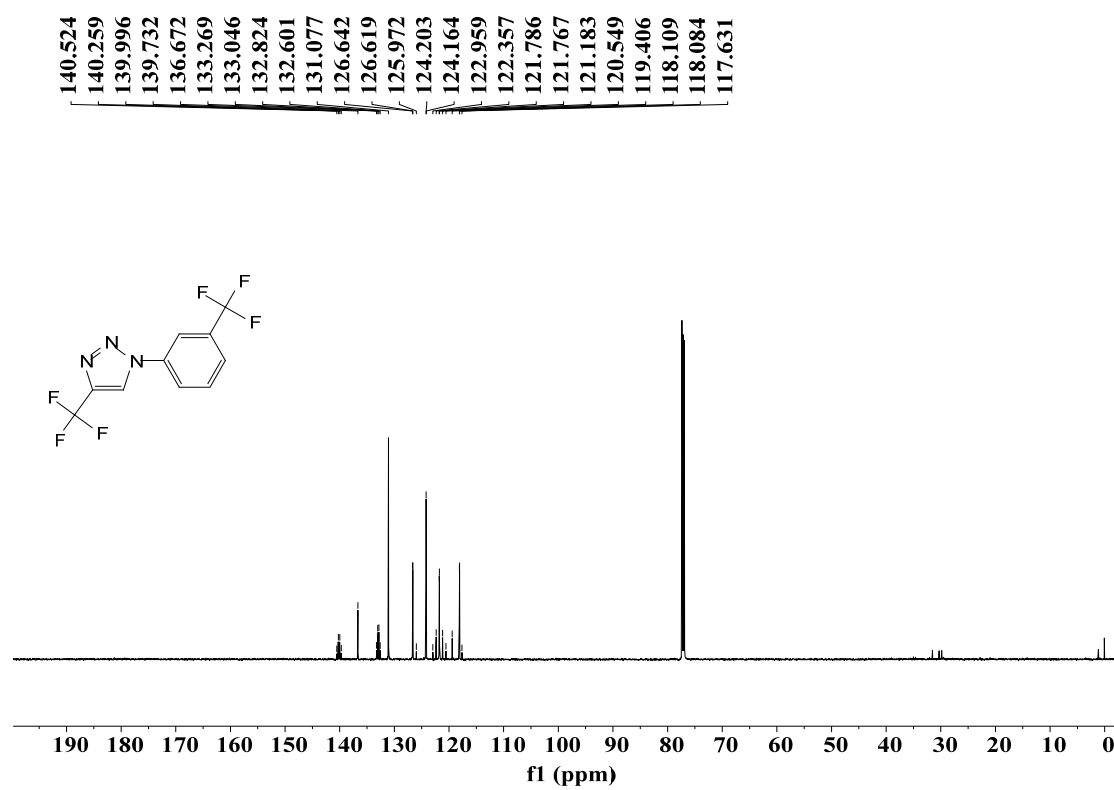

3h-<sup>13</sup>C NMR

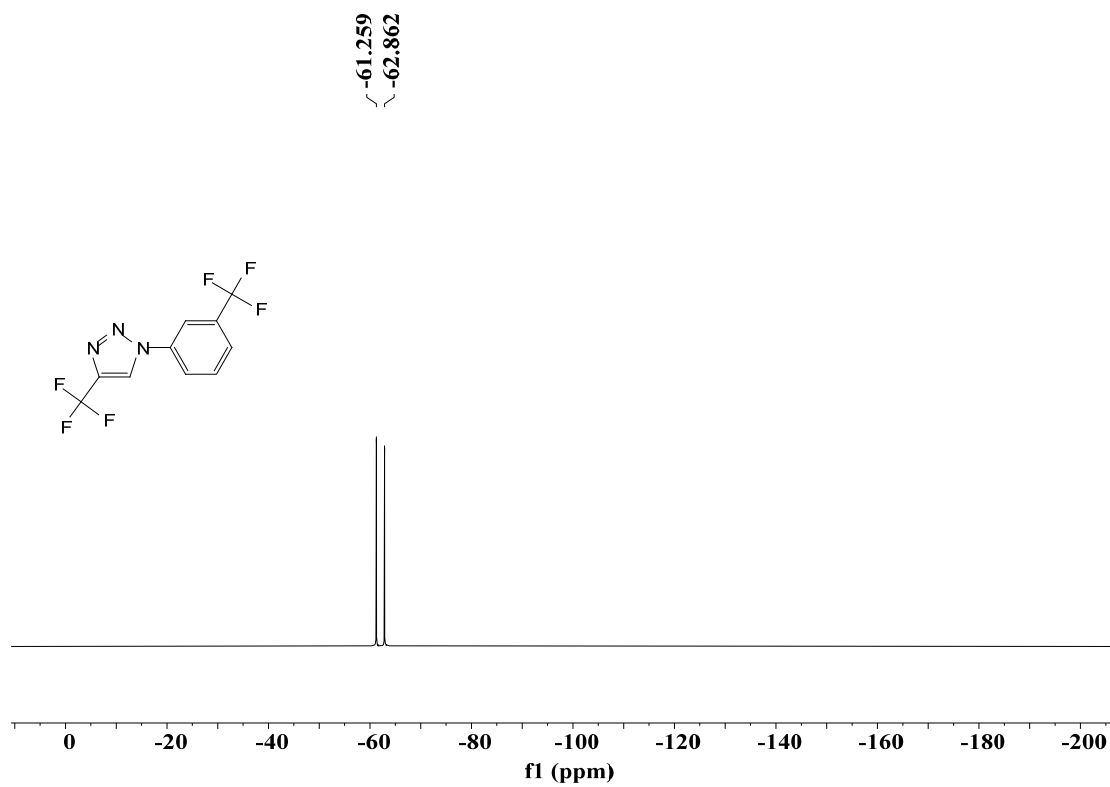

**3h- $^{19}\text{F}$  NMR**

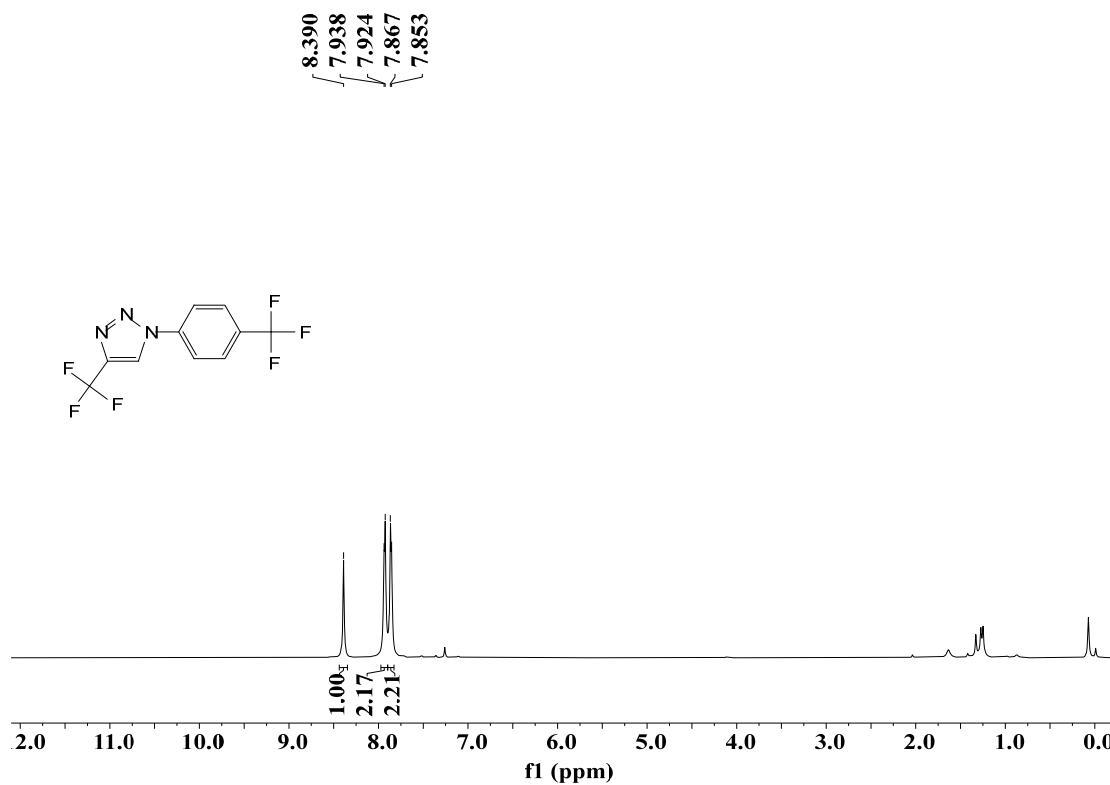

**3i- $^1\text{H}$  NMR**

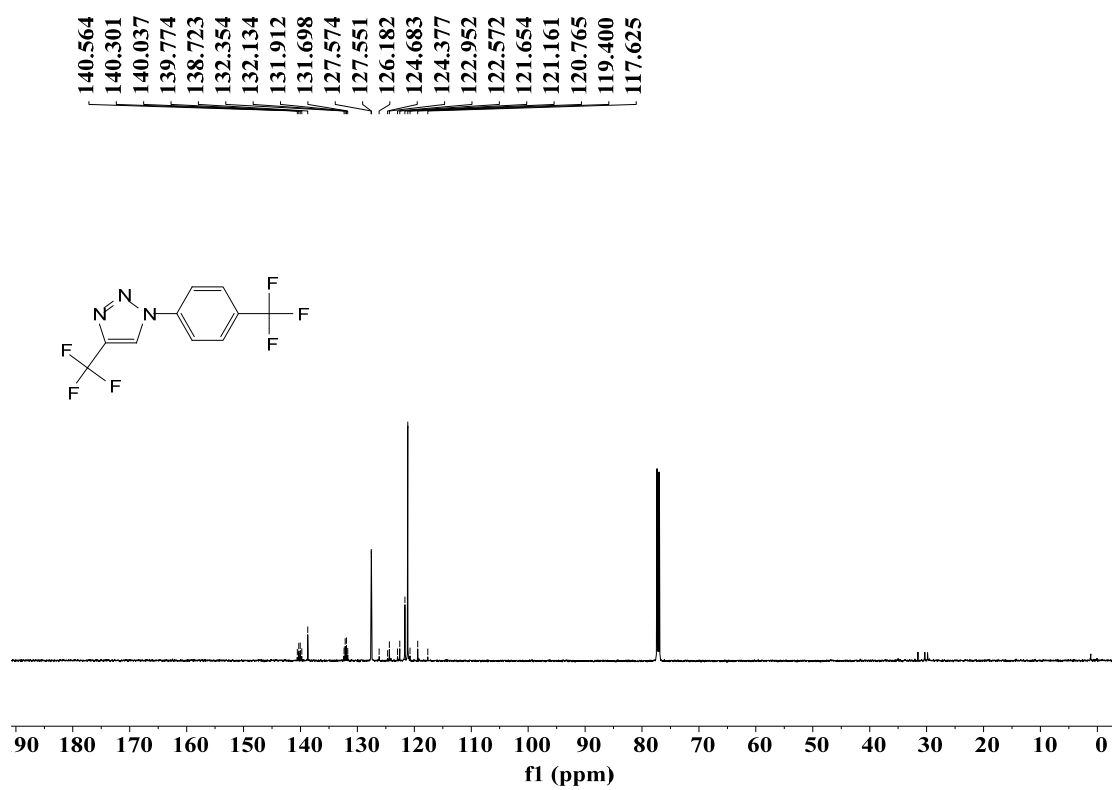

**3i-<sup>13</sup>C NMR**



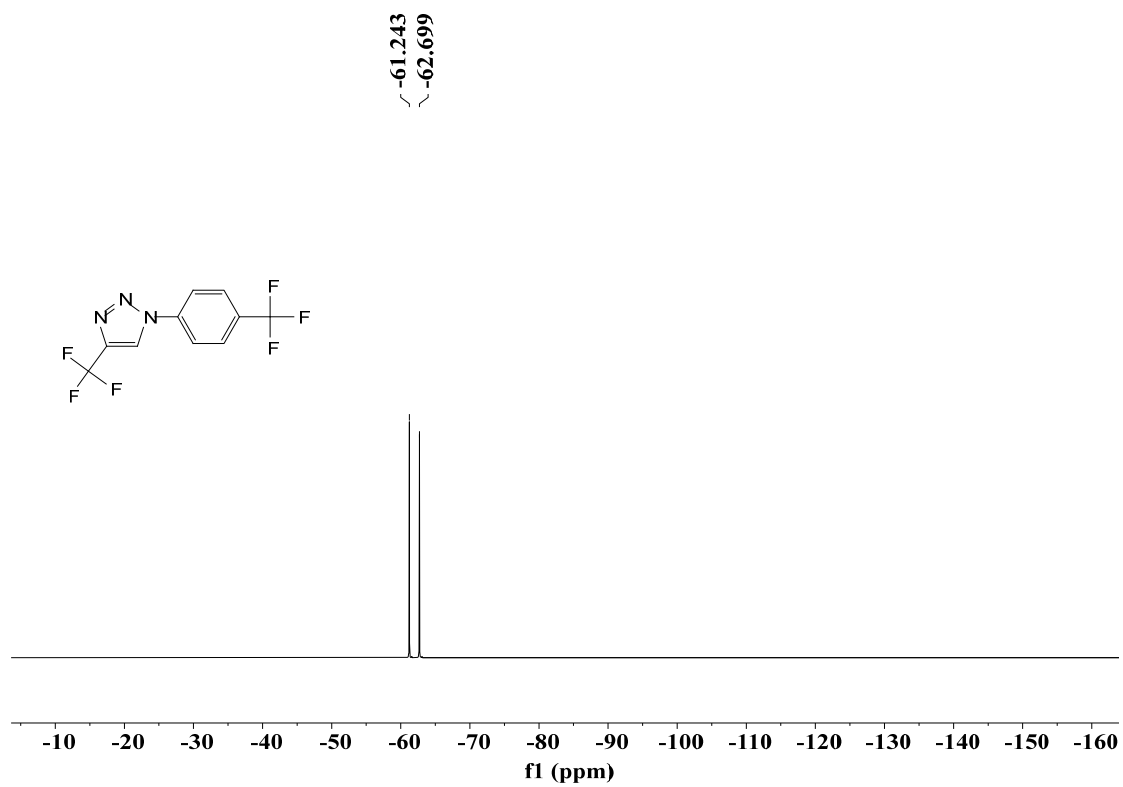

**3i- $^{19}\text{F}$  NMR**

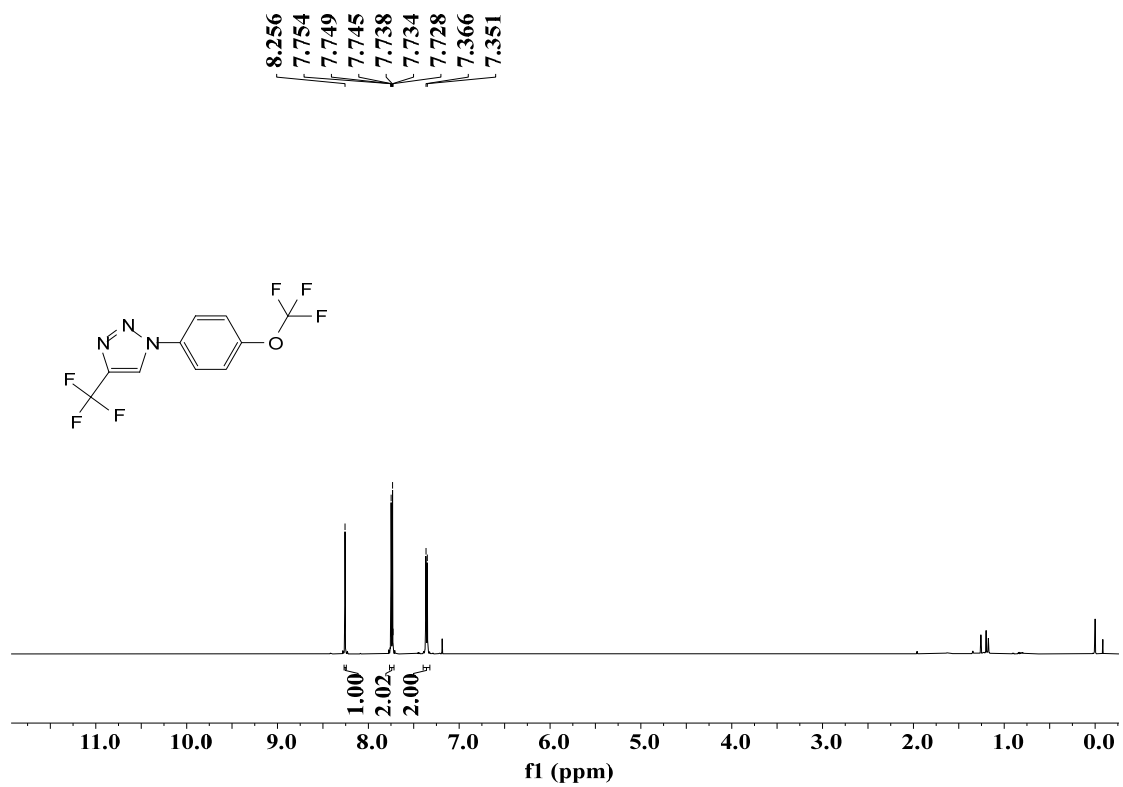

**3j- $^1\text{H}$  NMR**

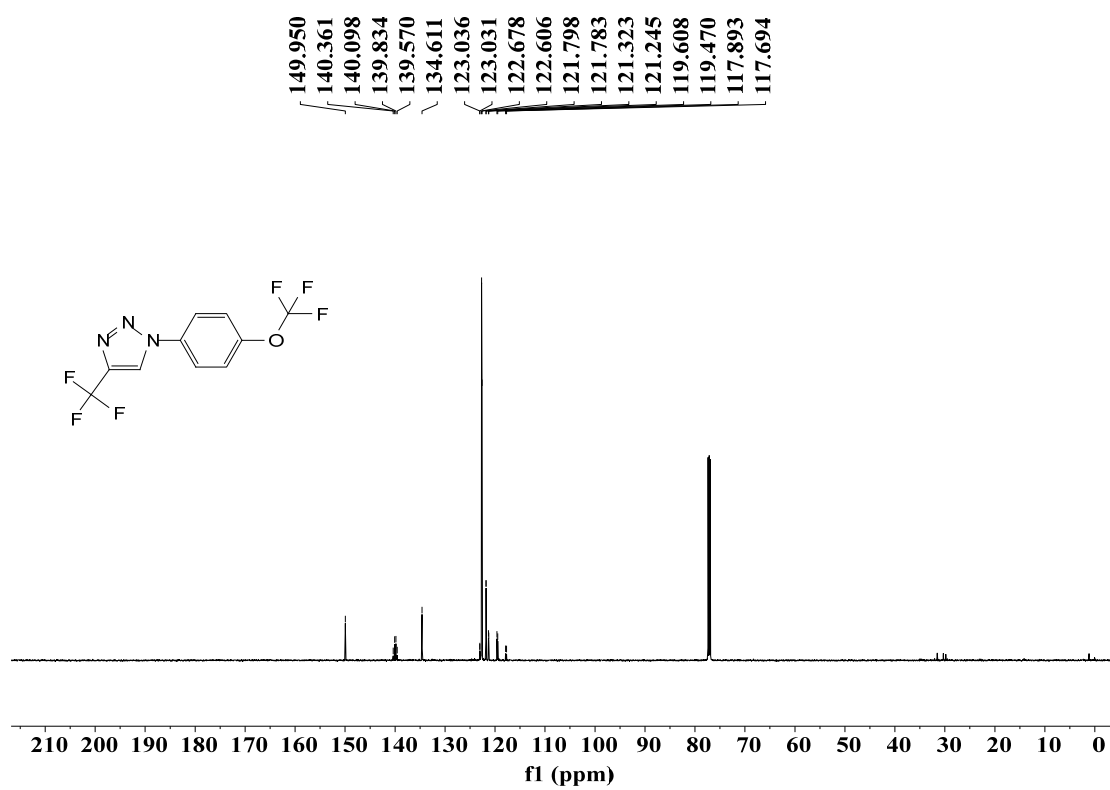

3j-<sup>13</sup>C NMR

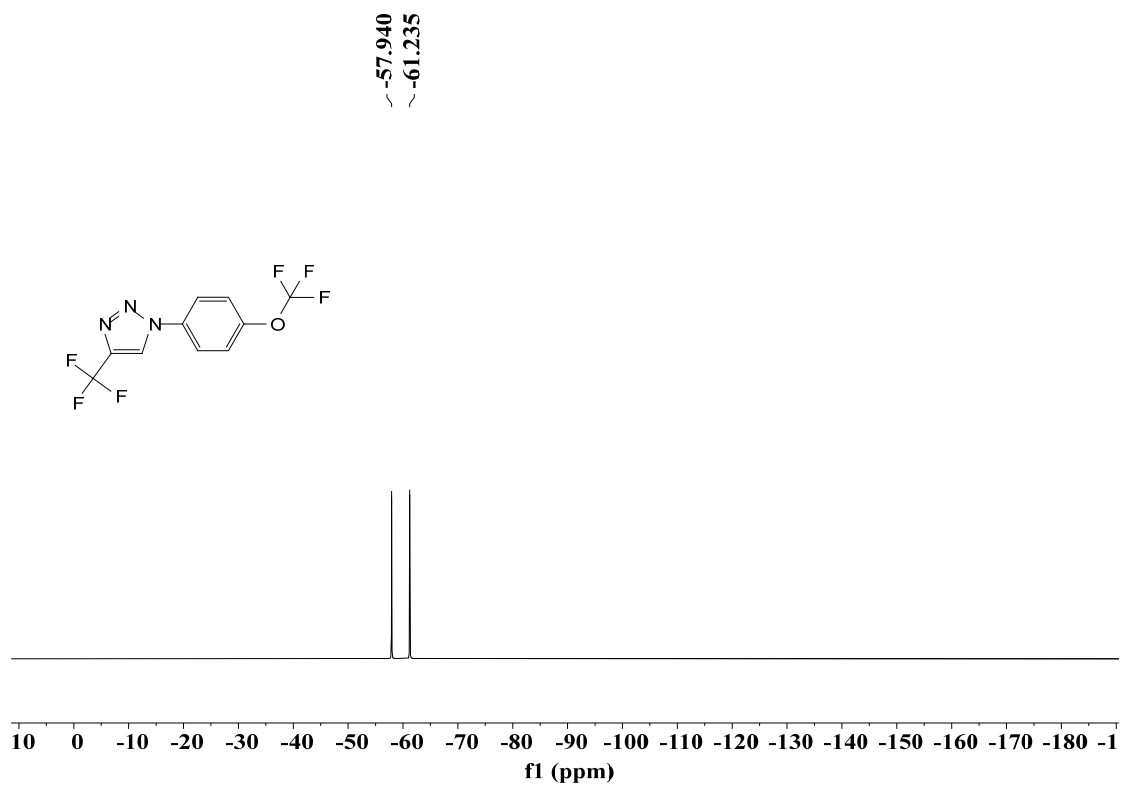

3j-<sup>19</sup>F NMR

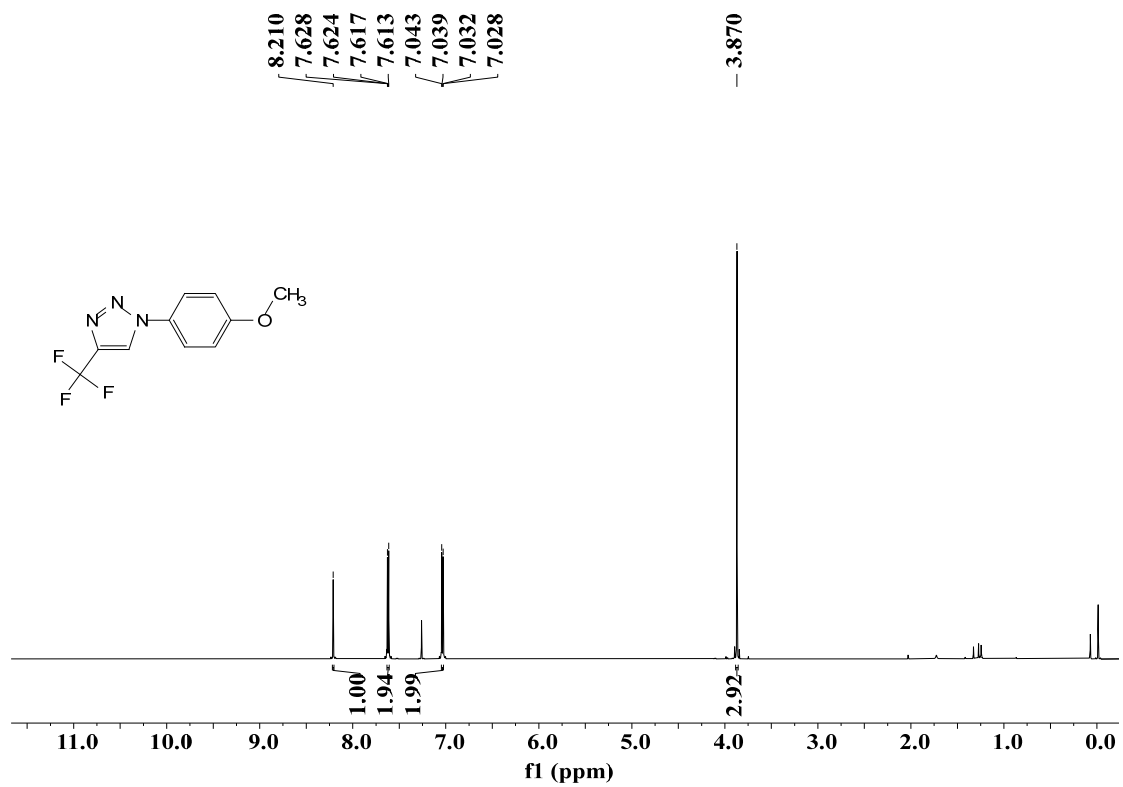

3k-<sup>1</sup>H NMR

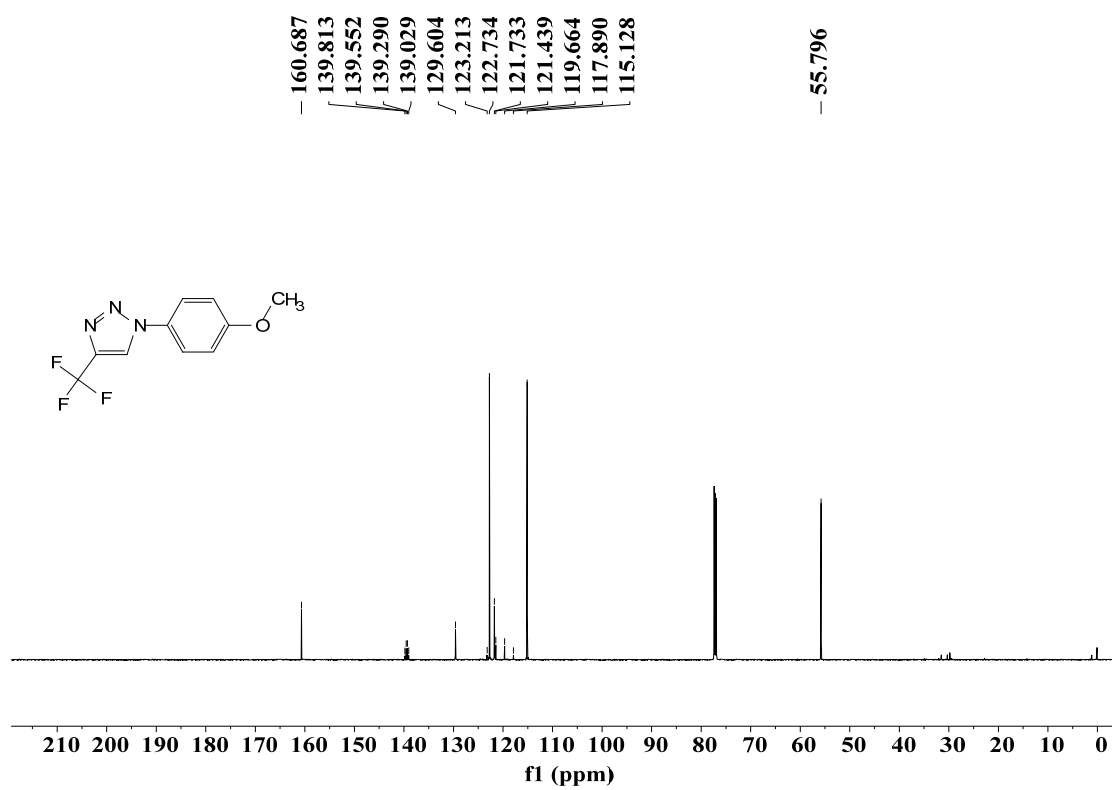

3k- $^{13}\text{C}$  NMR

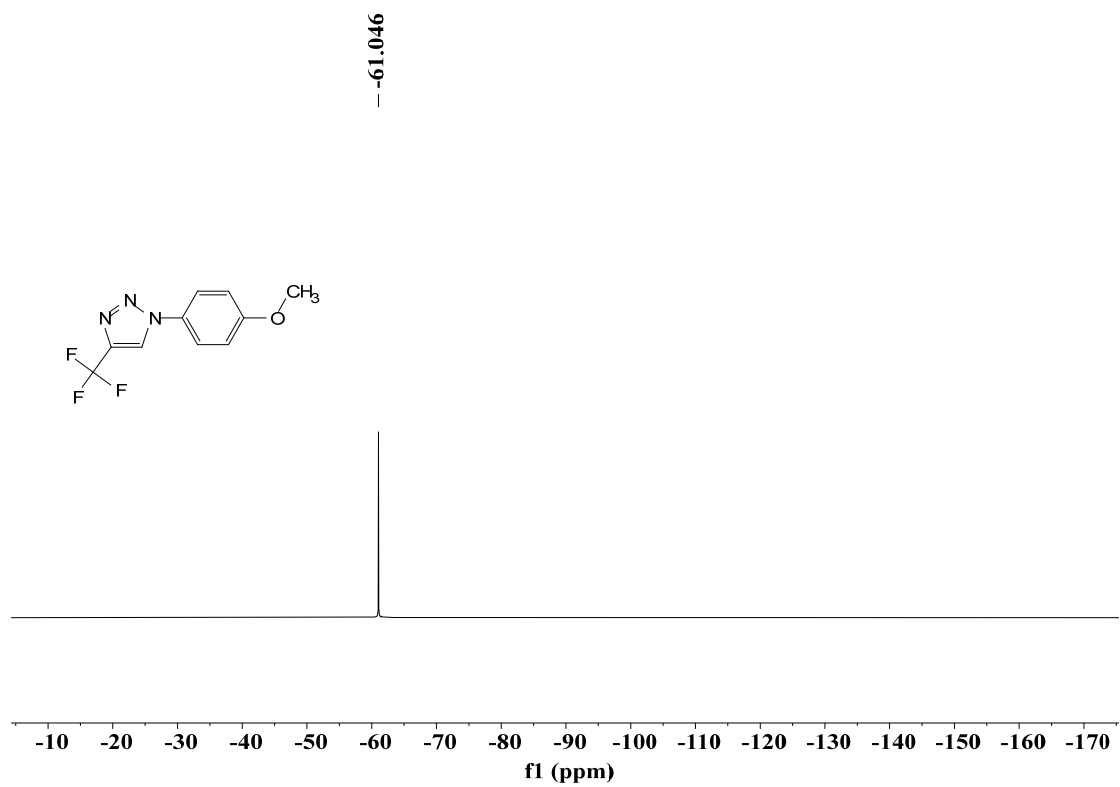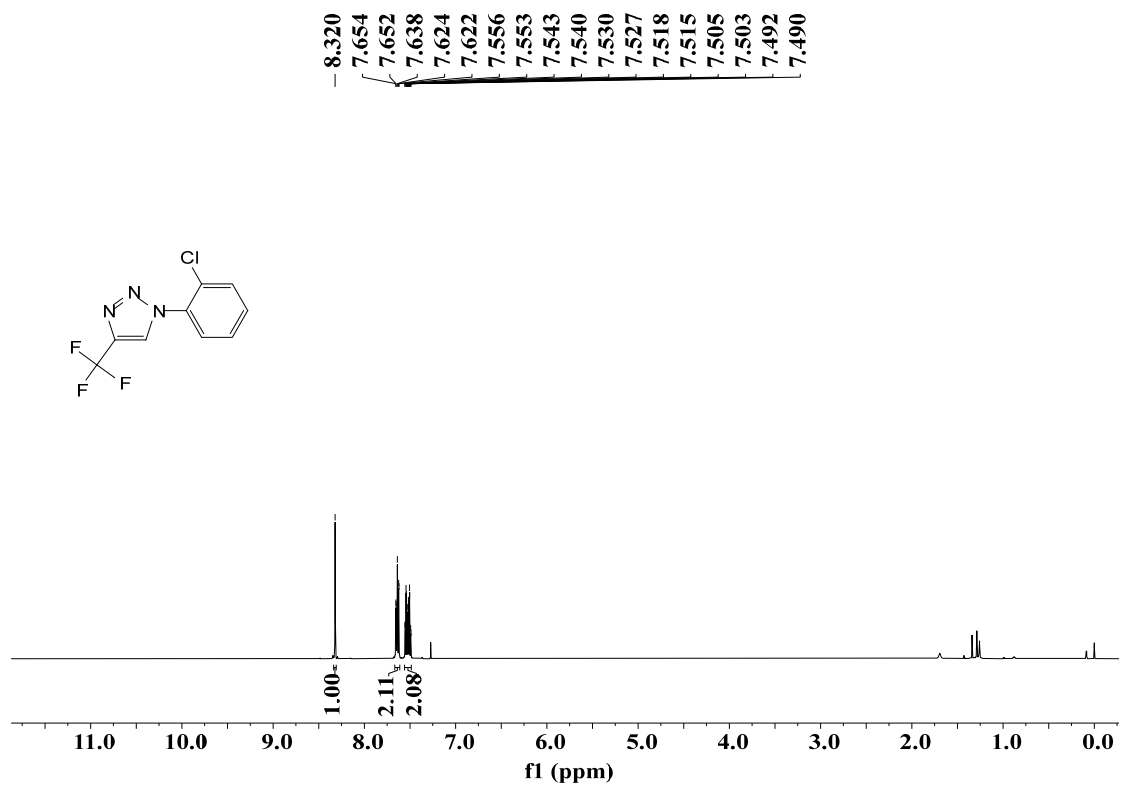

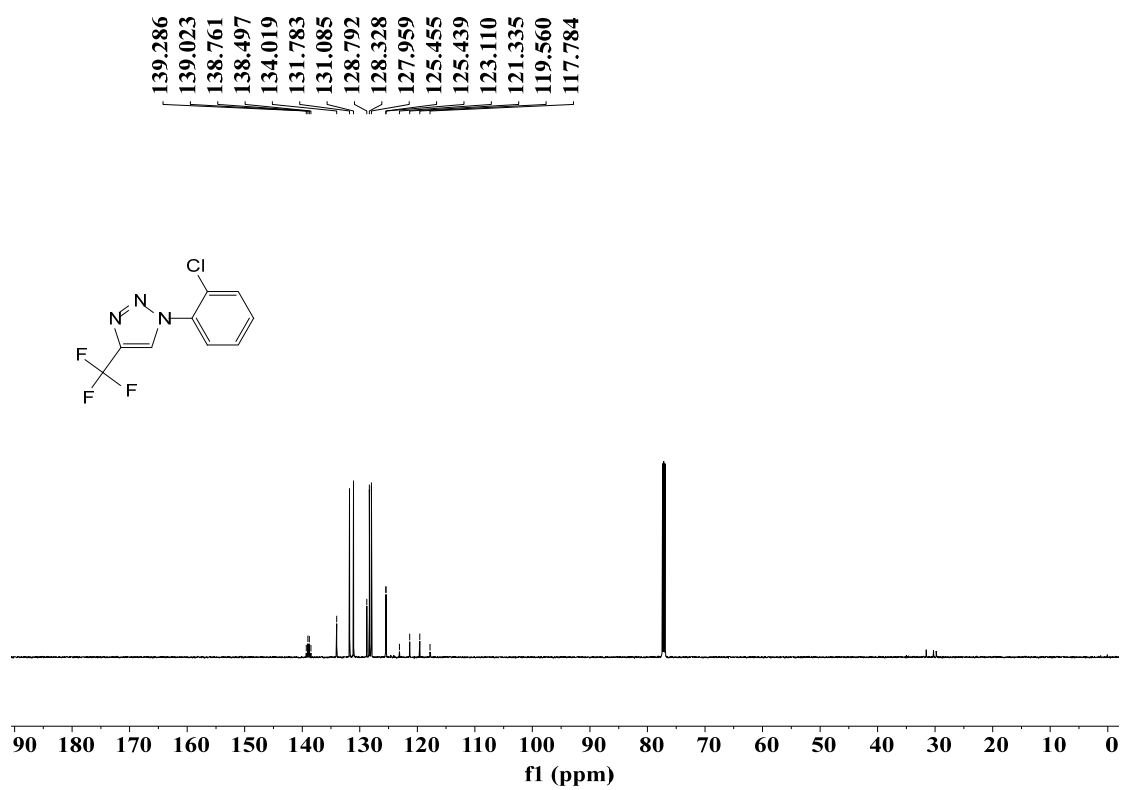

**$31\text{-}^{13}\text{C}$  NMR**

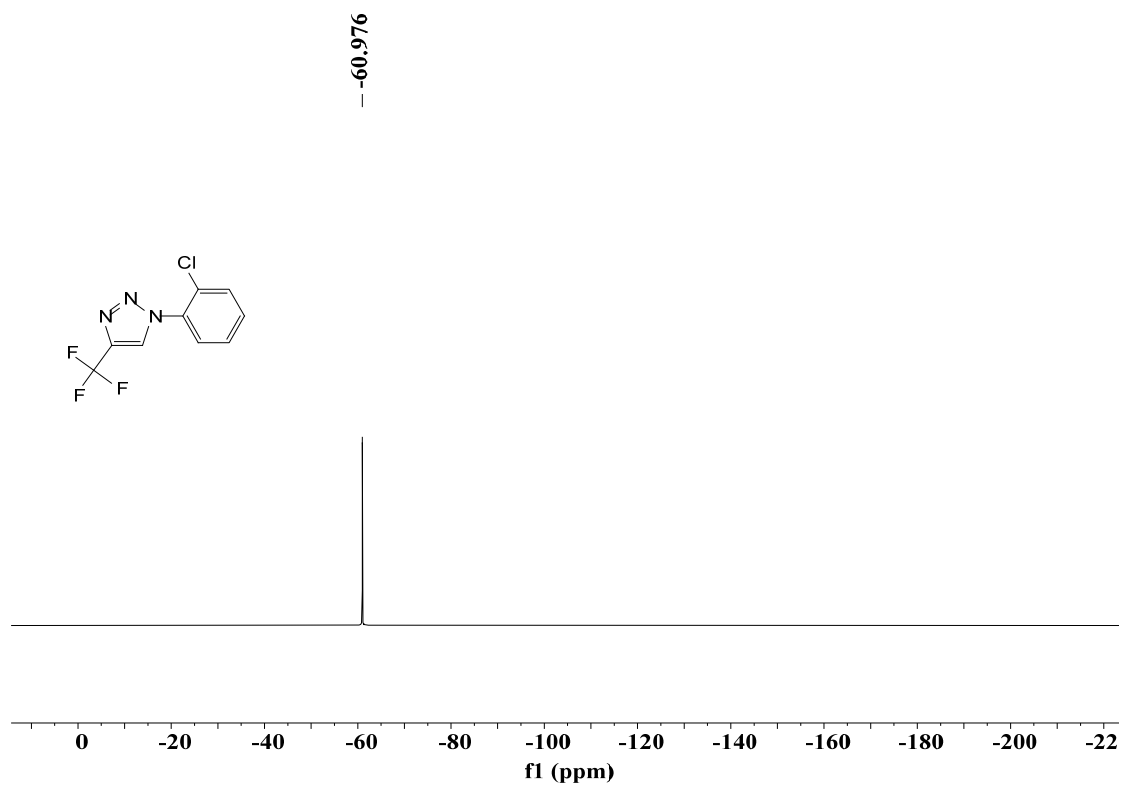

$^{31}\text{F}$  NMR

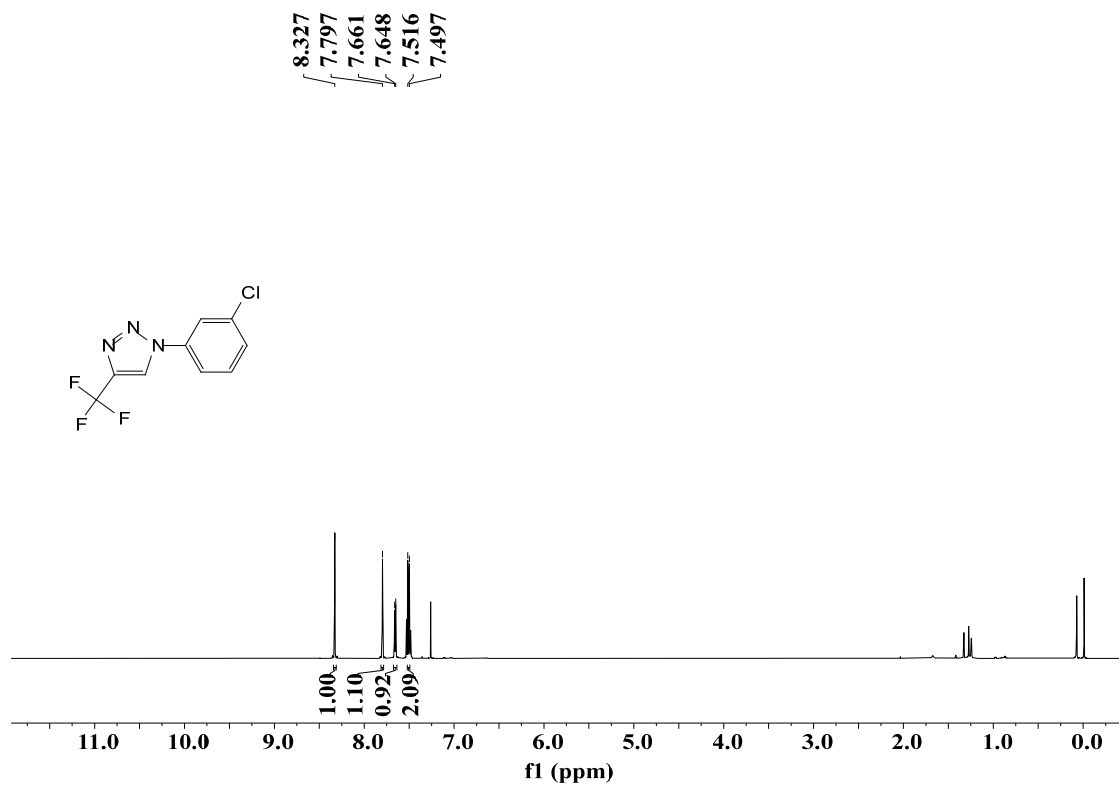

$^1\text{H}$  NMR

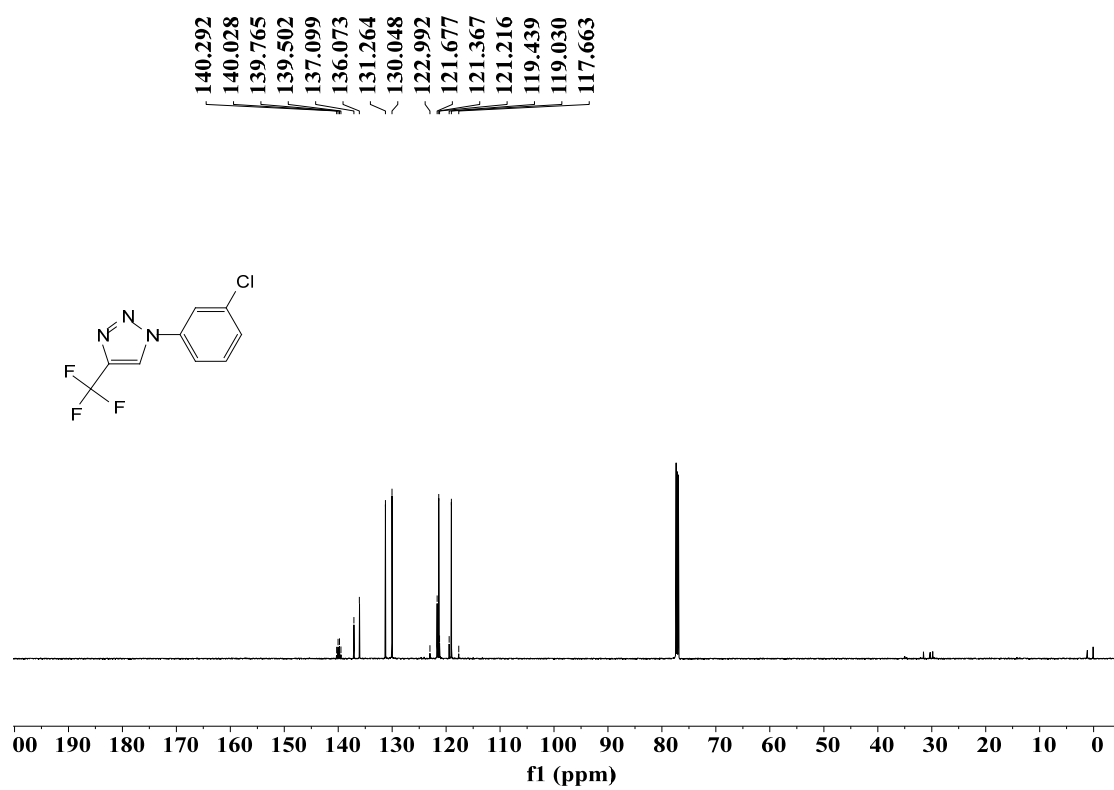

3m-<sup>13</sup>C NMR



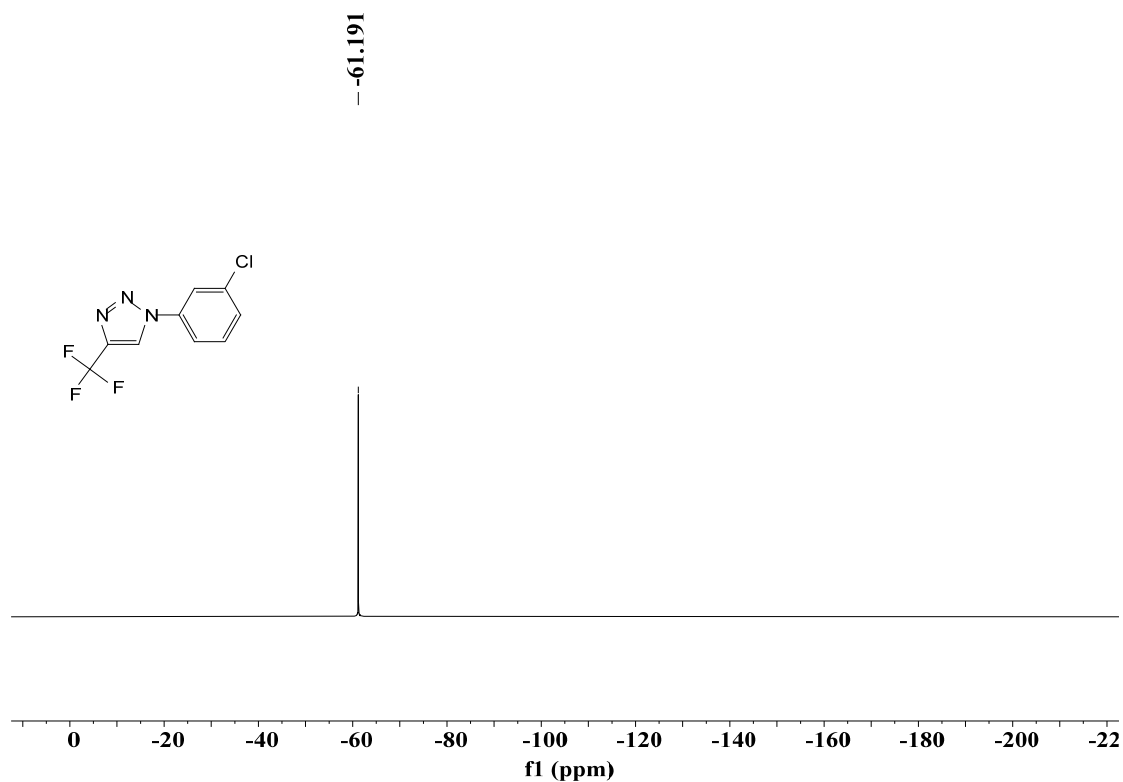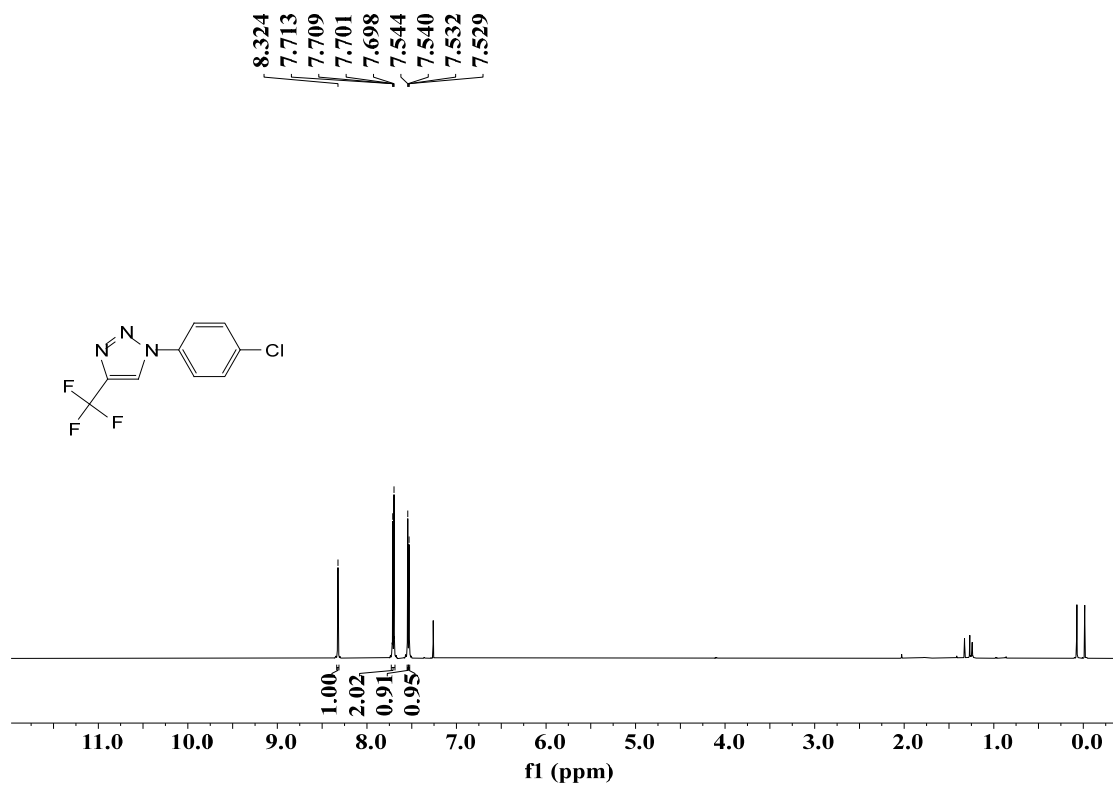

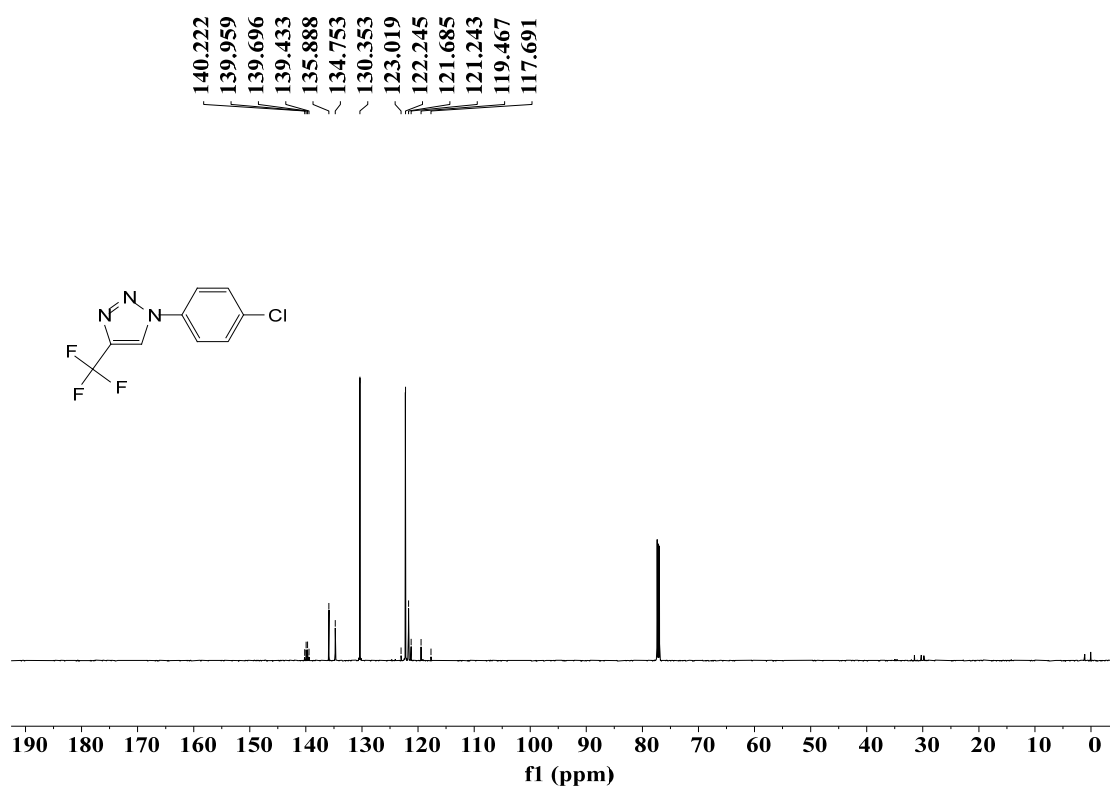

**3n-<sup>13</sup>C NMR**

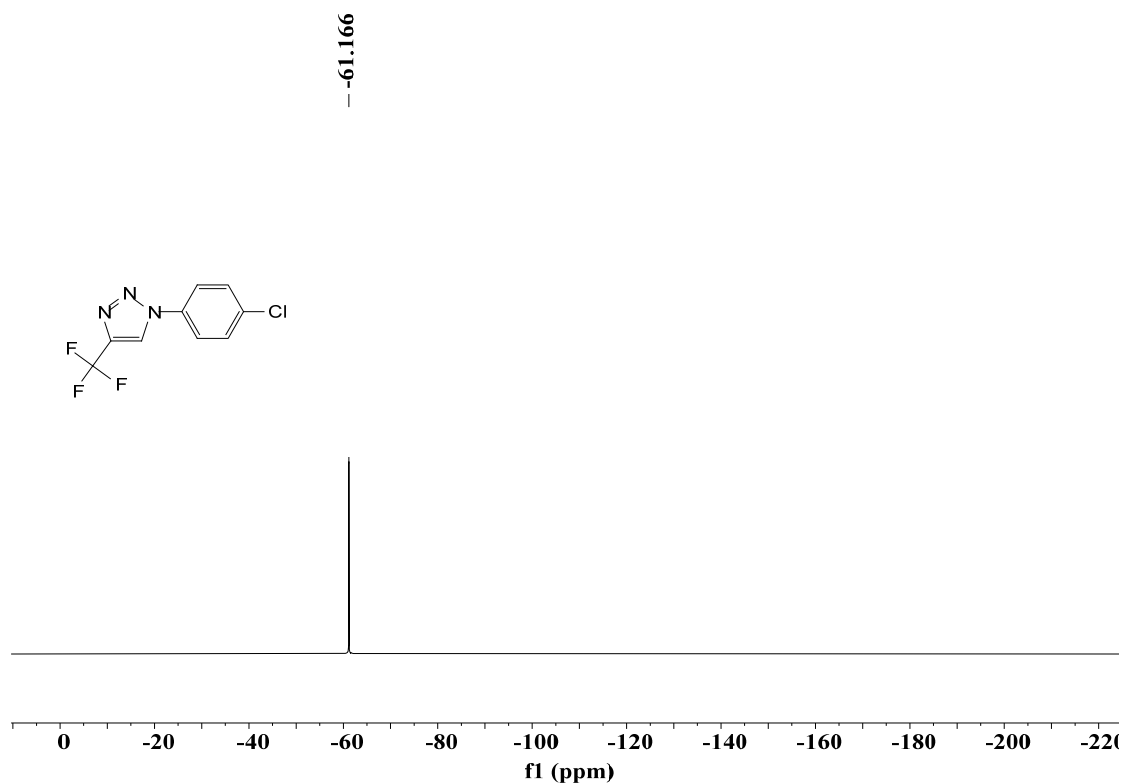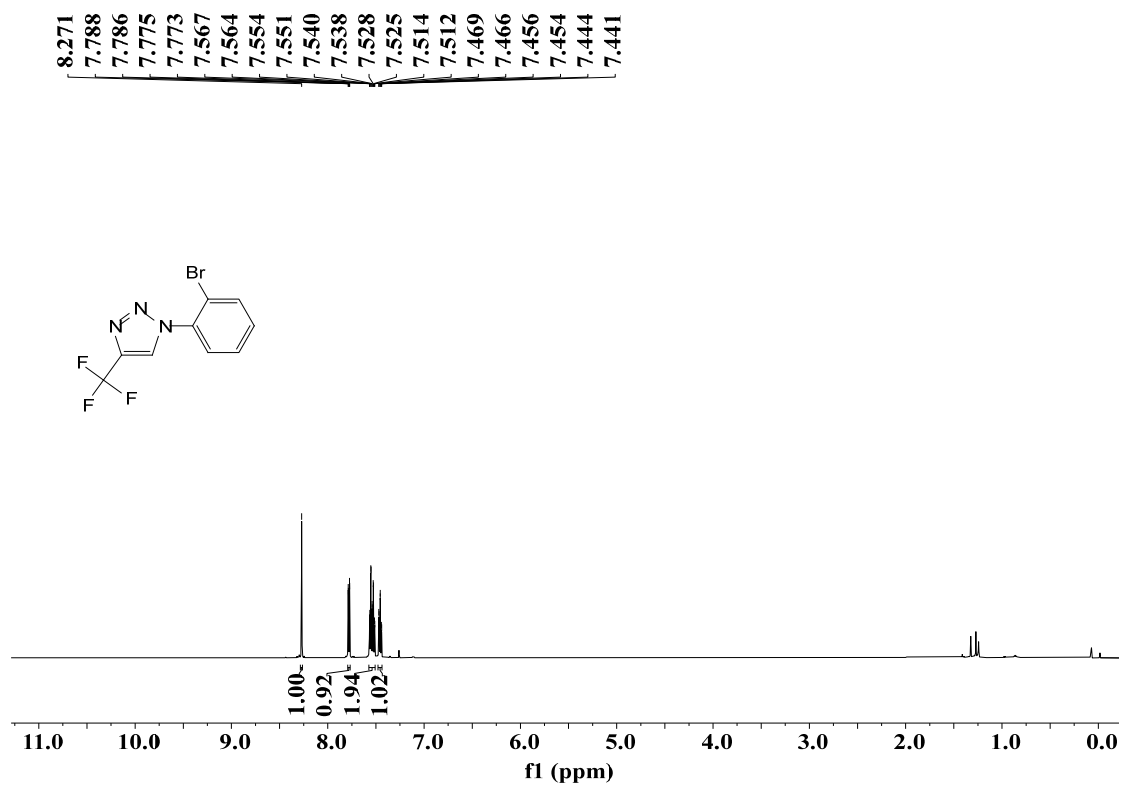

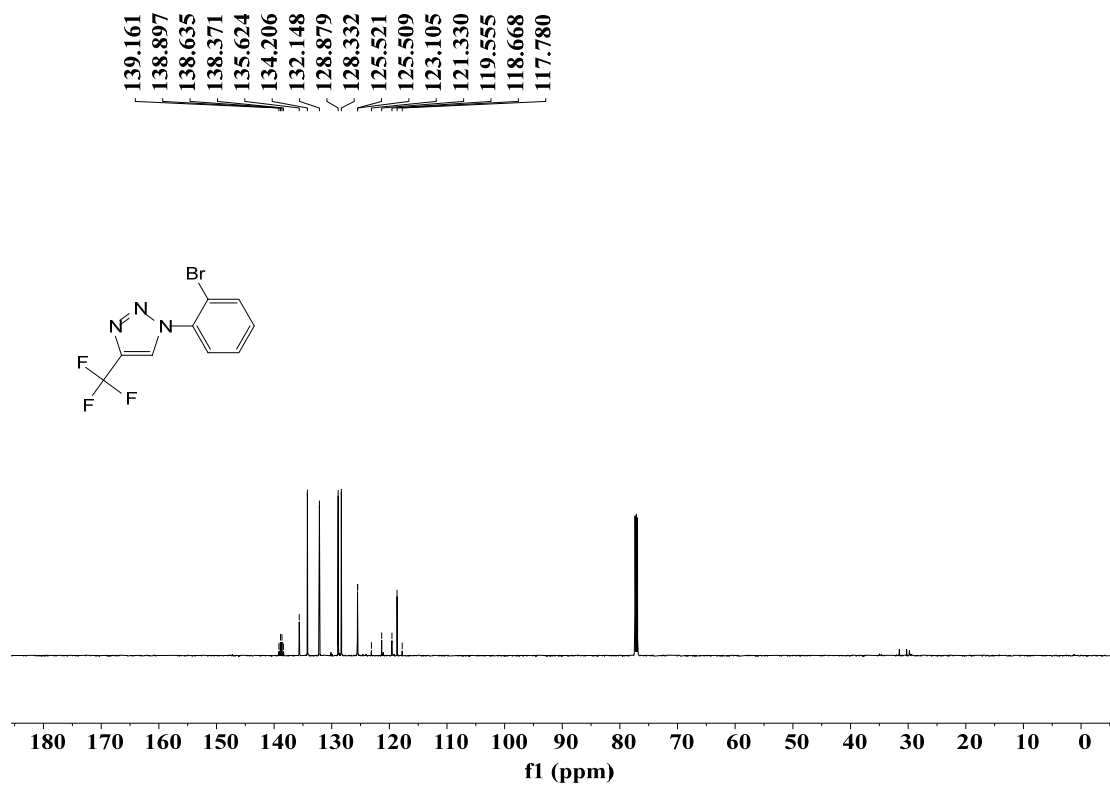

**3o- $^{13}\text{C}$  NMR**

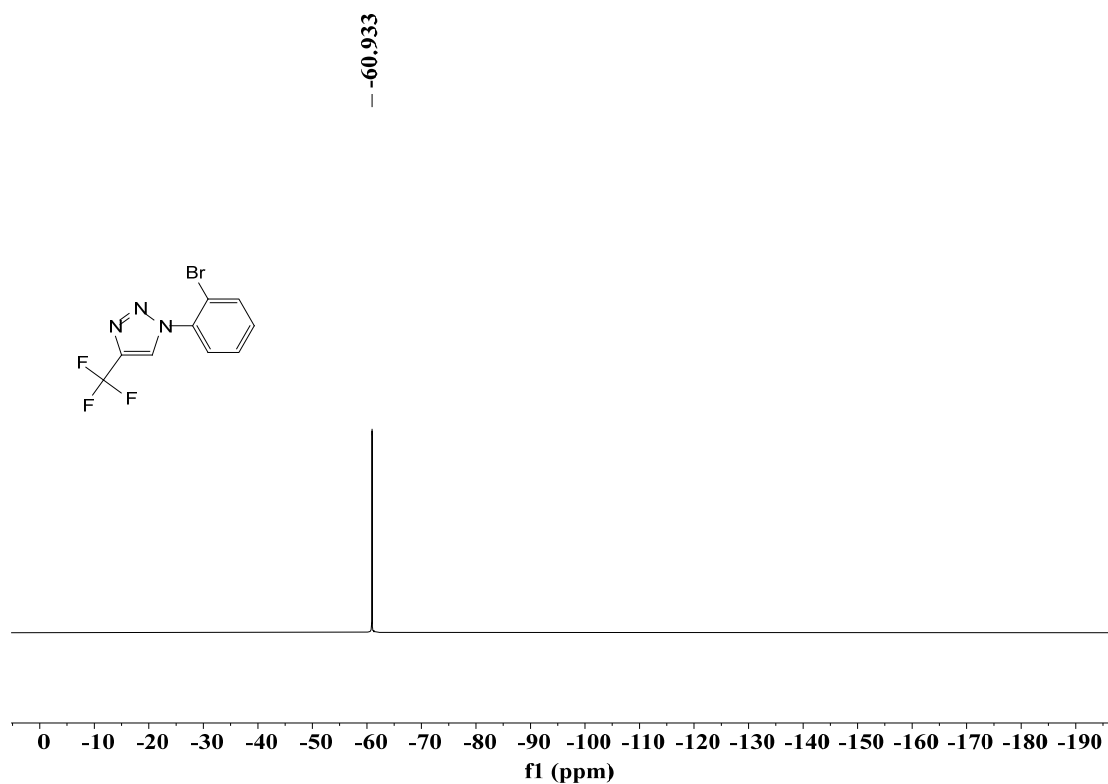

### $^{19}\text{F}$ NMR

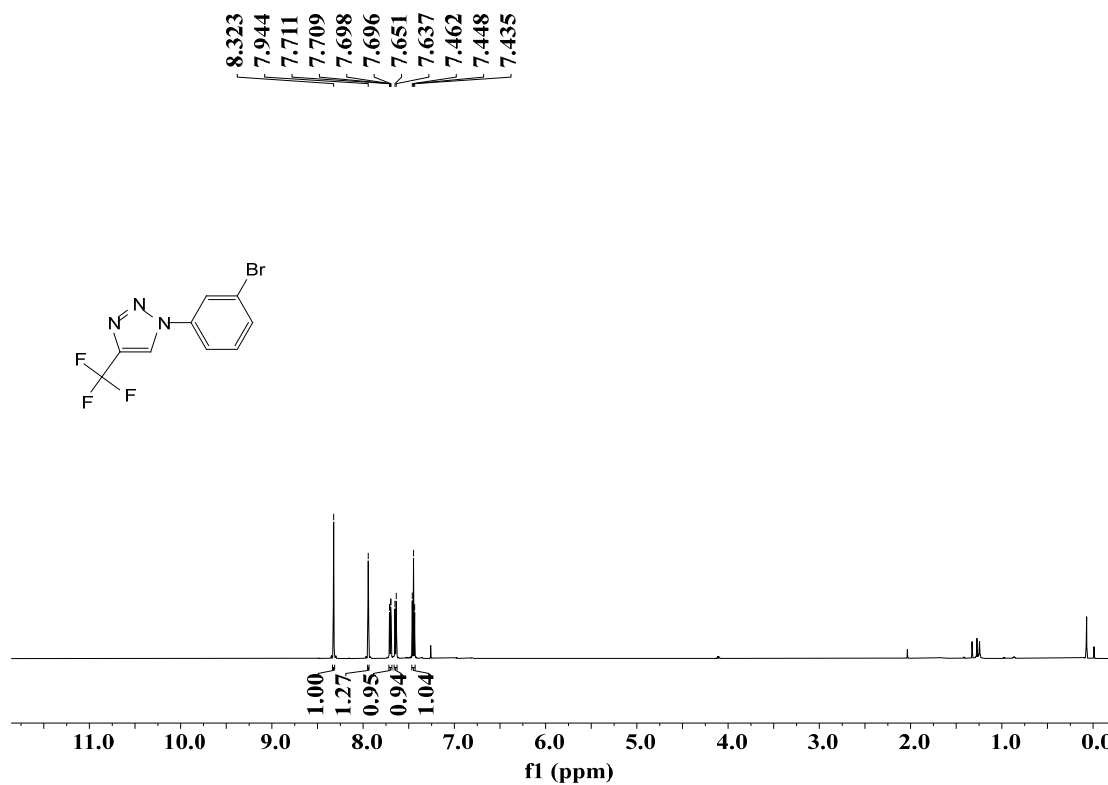

### $^1\text{H}$ NMR

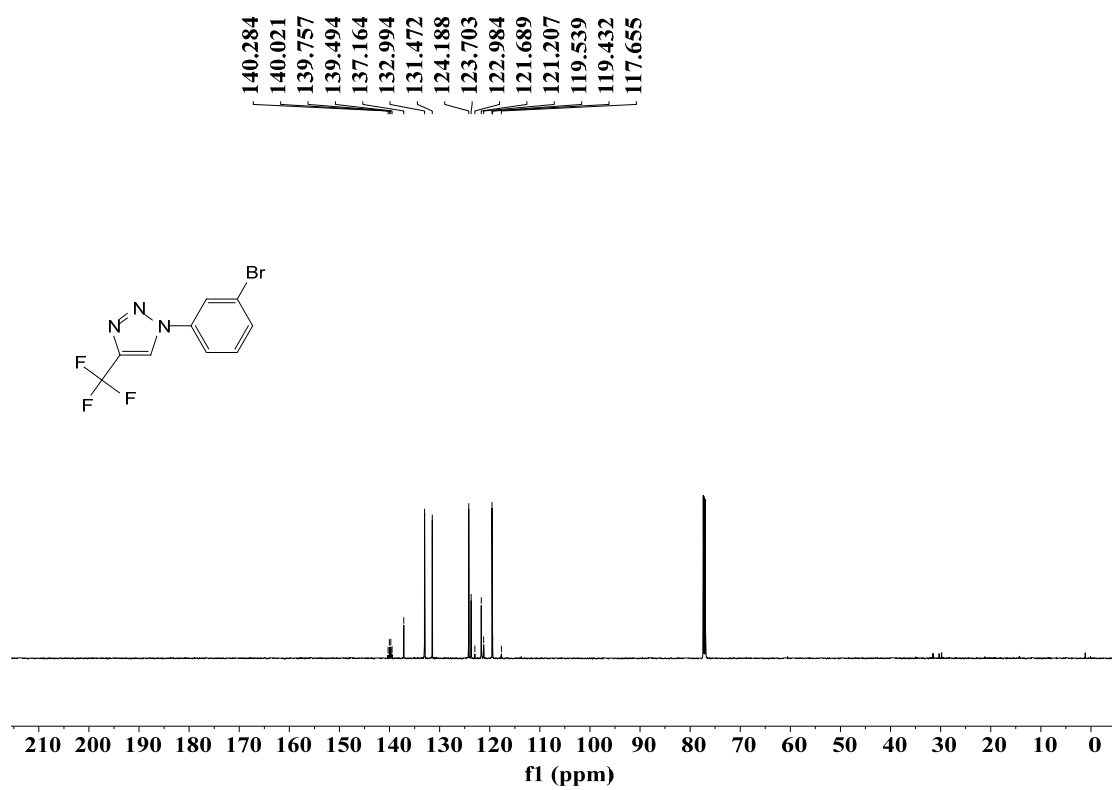

$^{13}\text{C}$  NMR

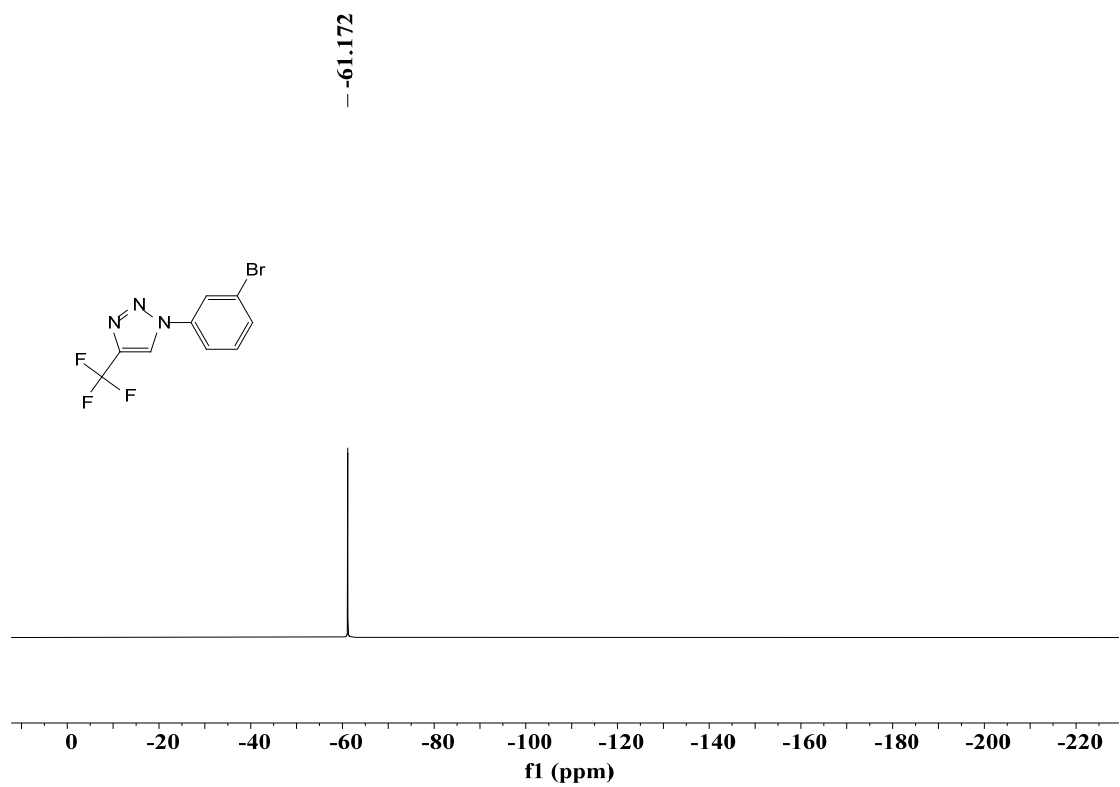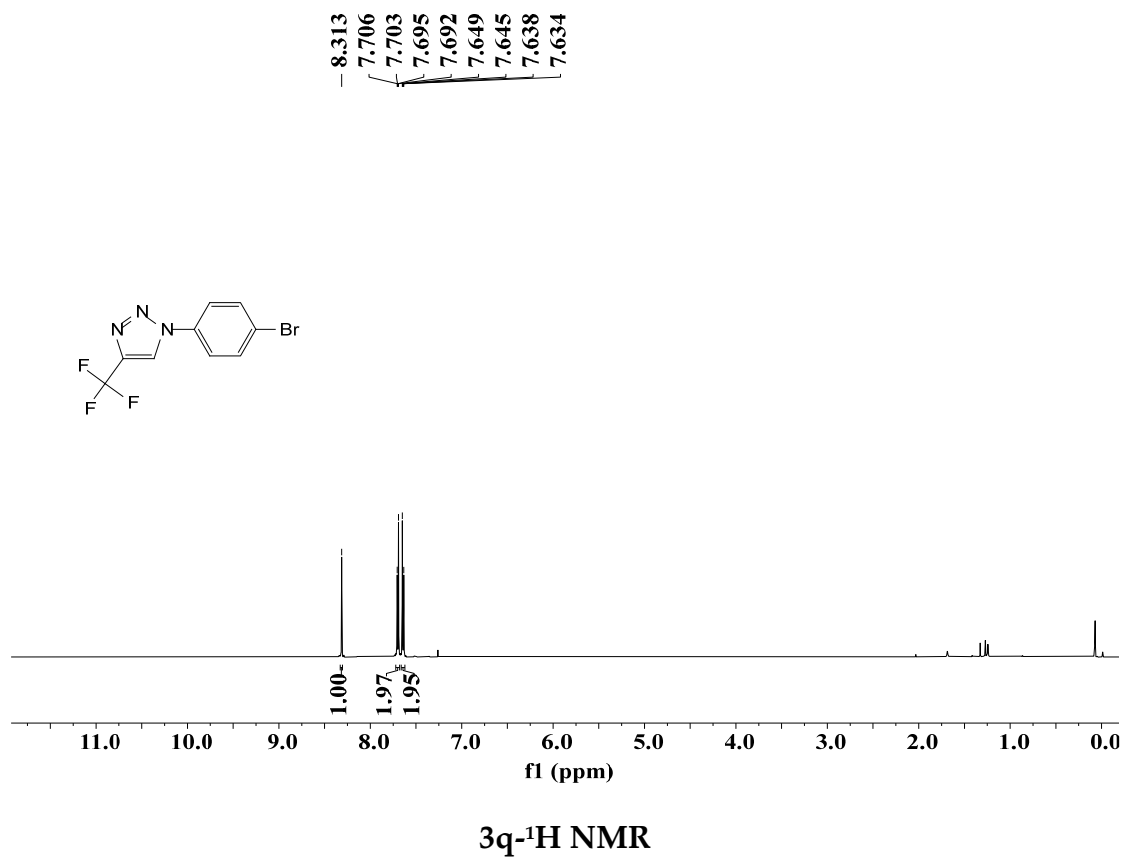

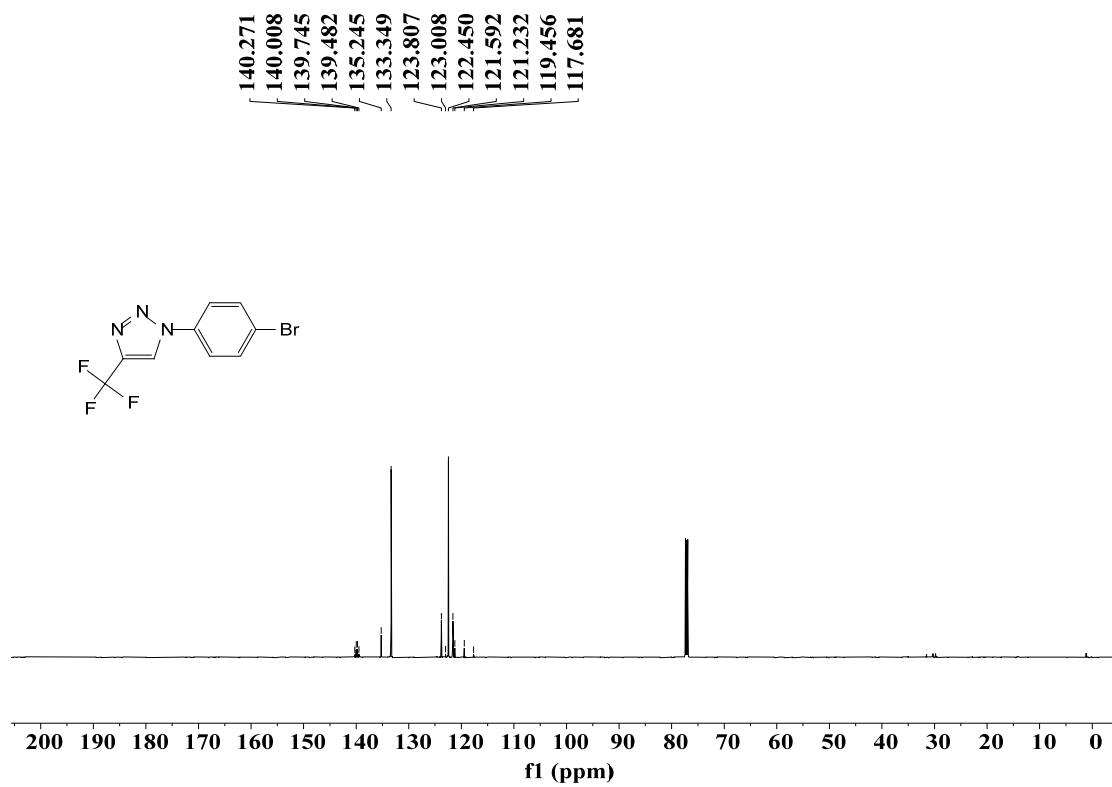

3q- $^{13}\text{C}$  NMR



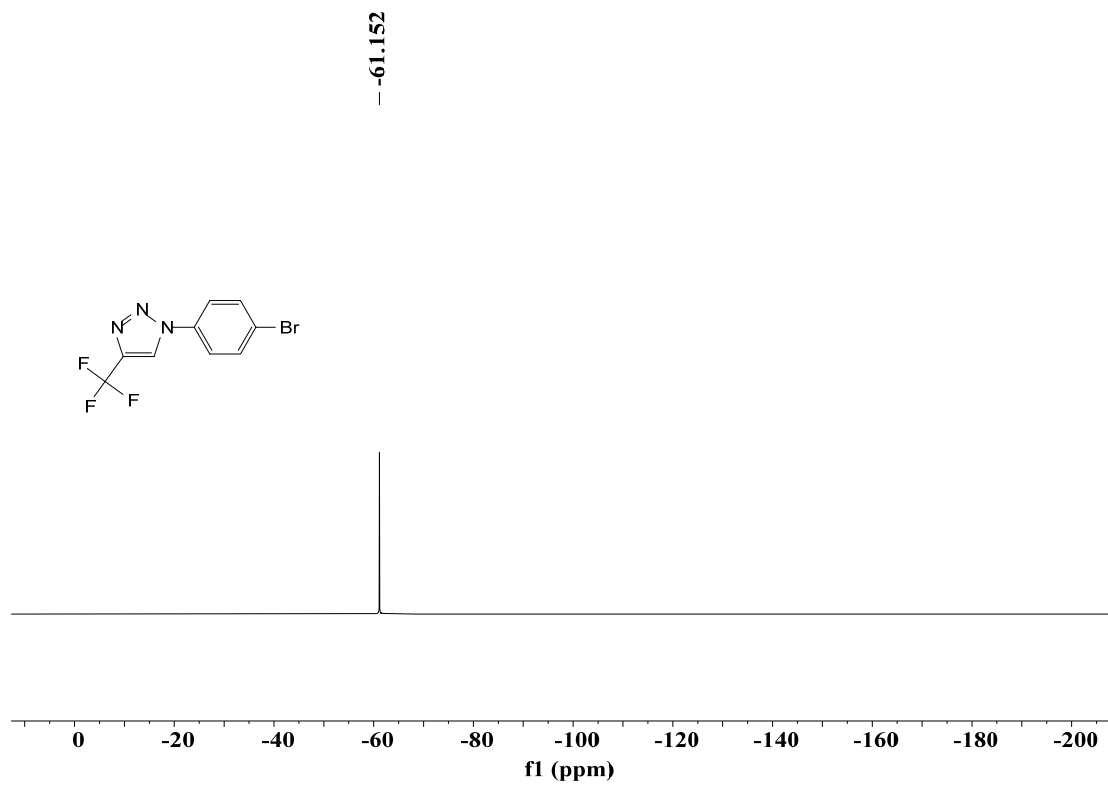

3q- $^{19}\text{F}$  NMR

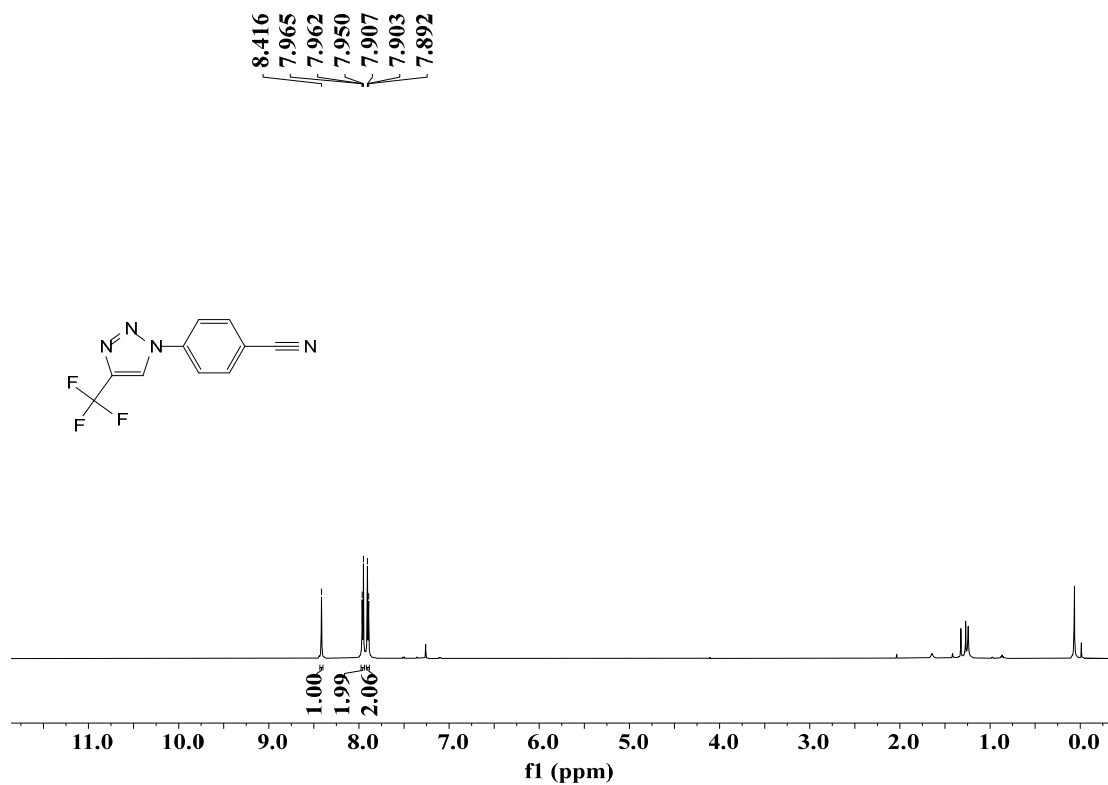

3r- $^1\text{H}$  NMR

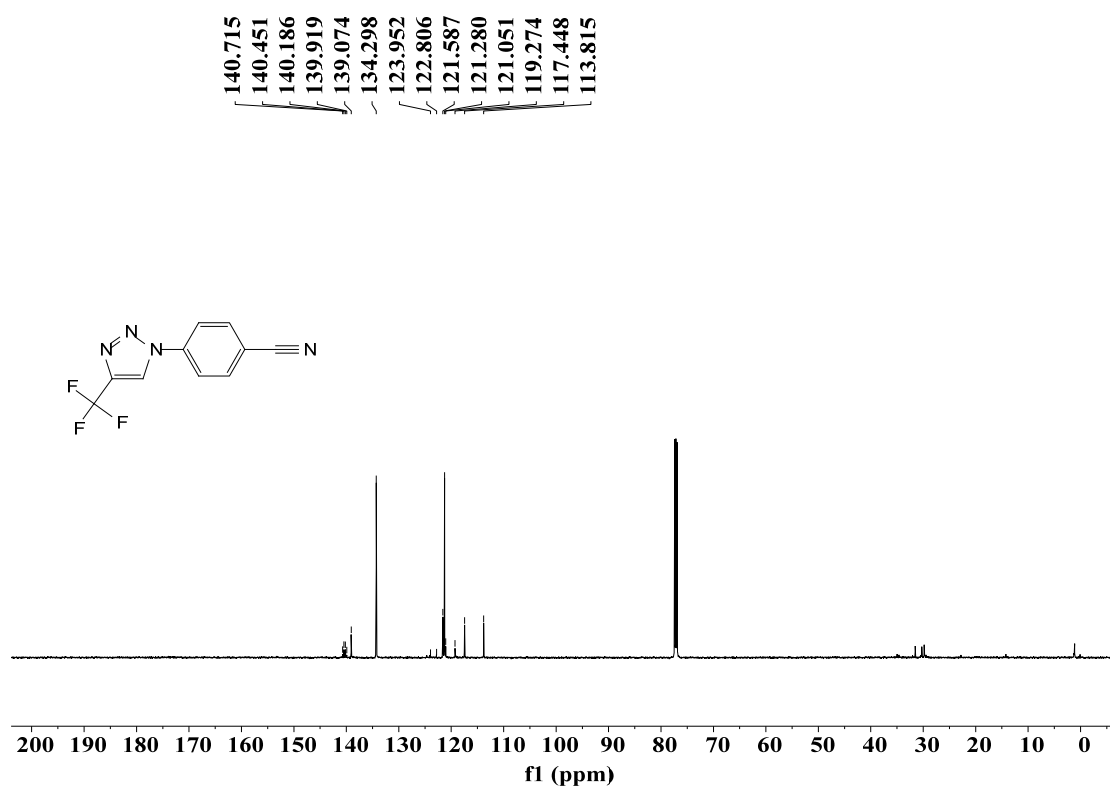

3r-<sup>13</sup>C NMR

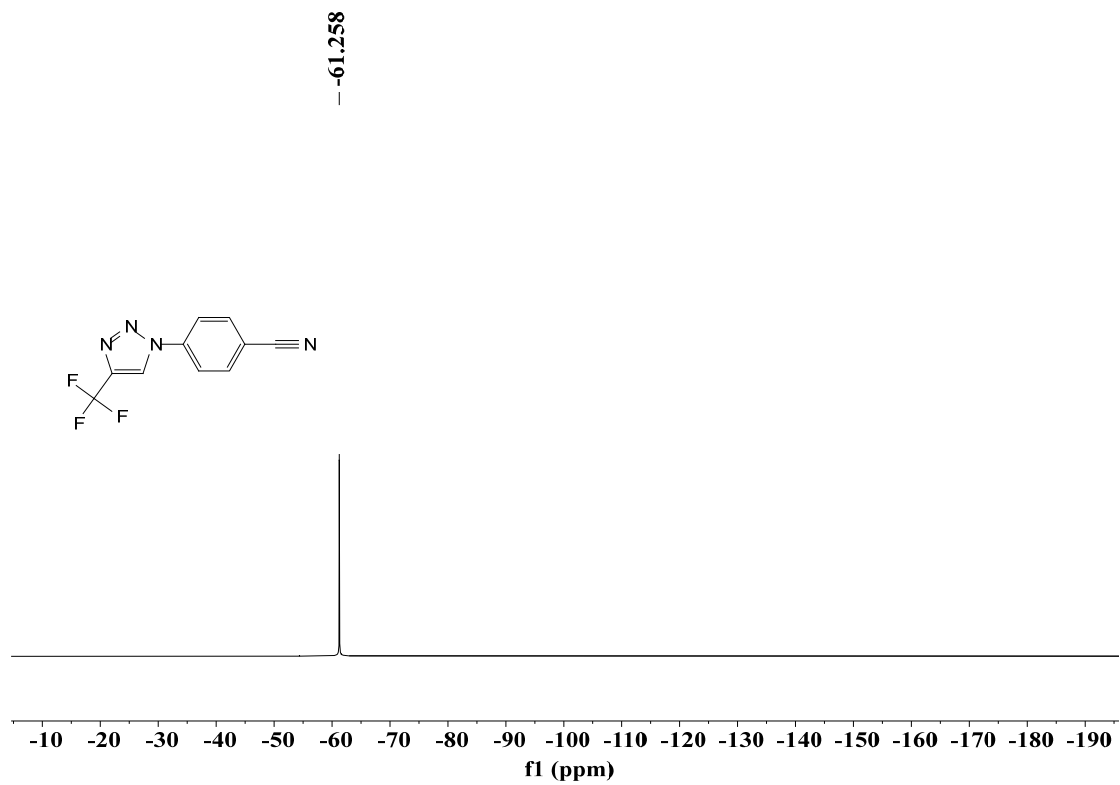

3r-<sup>19</sup>F NMR

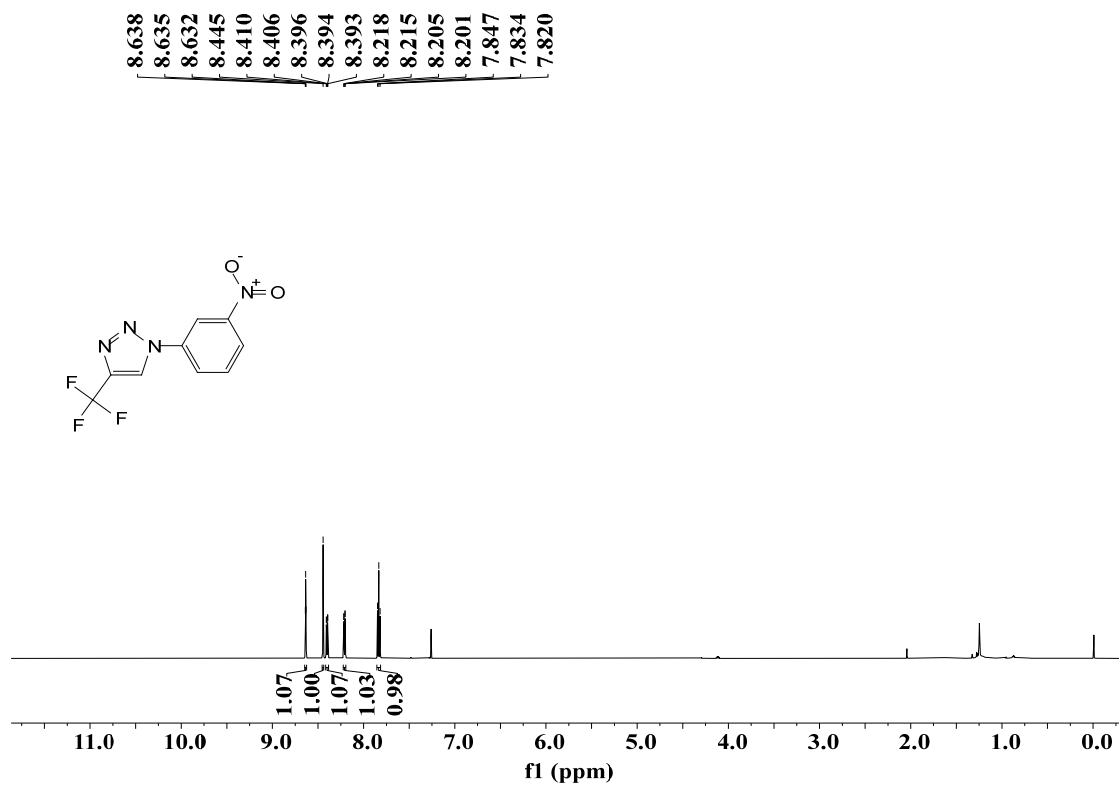

3s-<sup>1</sup>H NMR

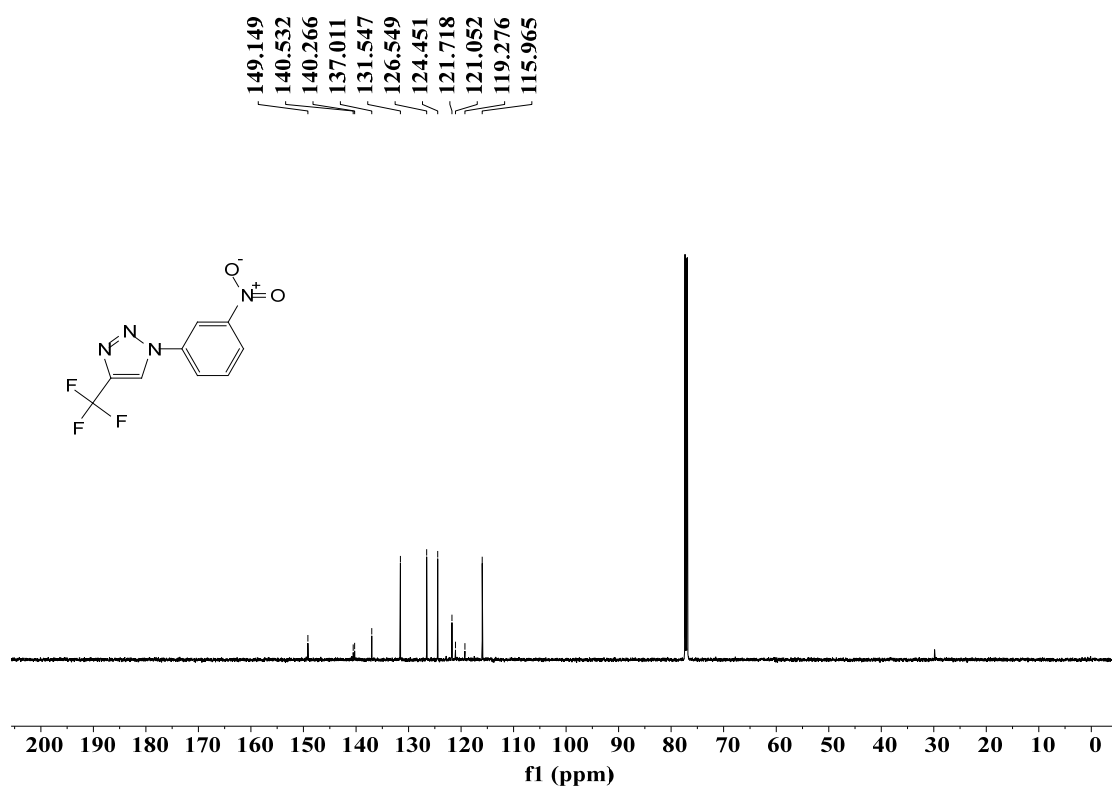

3s-<sup>13</sup>C NMR

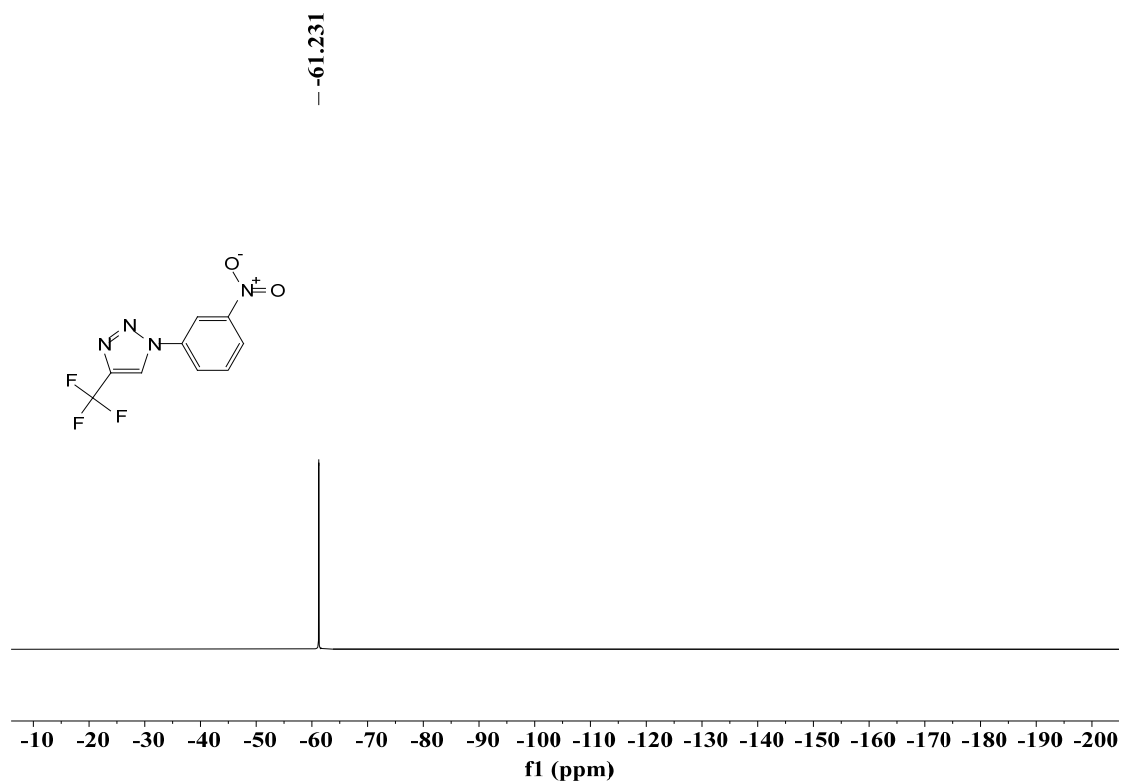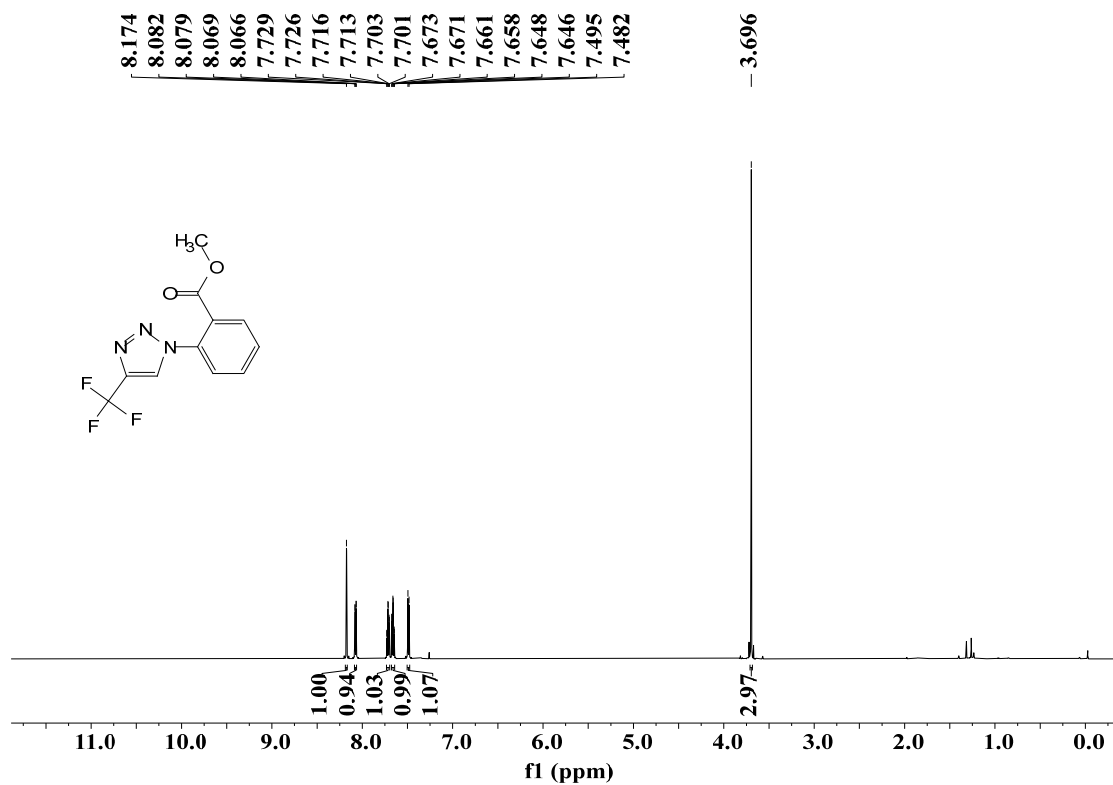

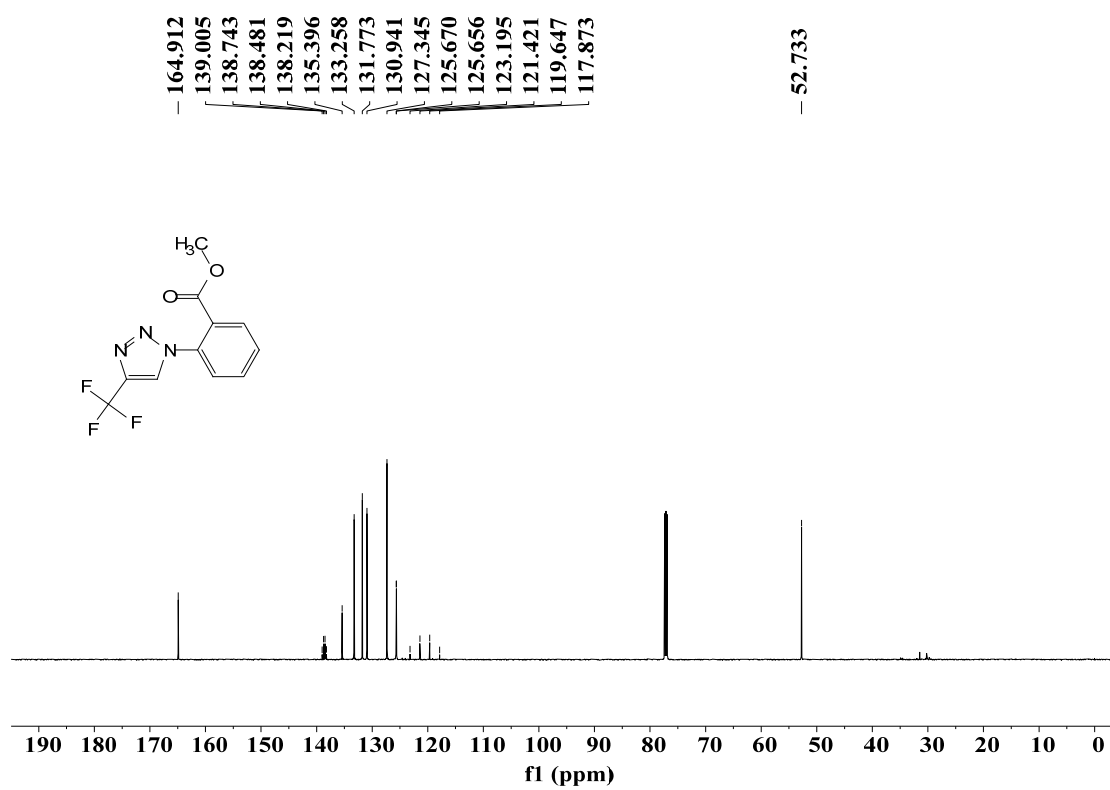

3t- $^{13}\text{C}$  NMR

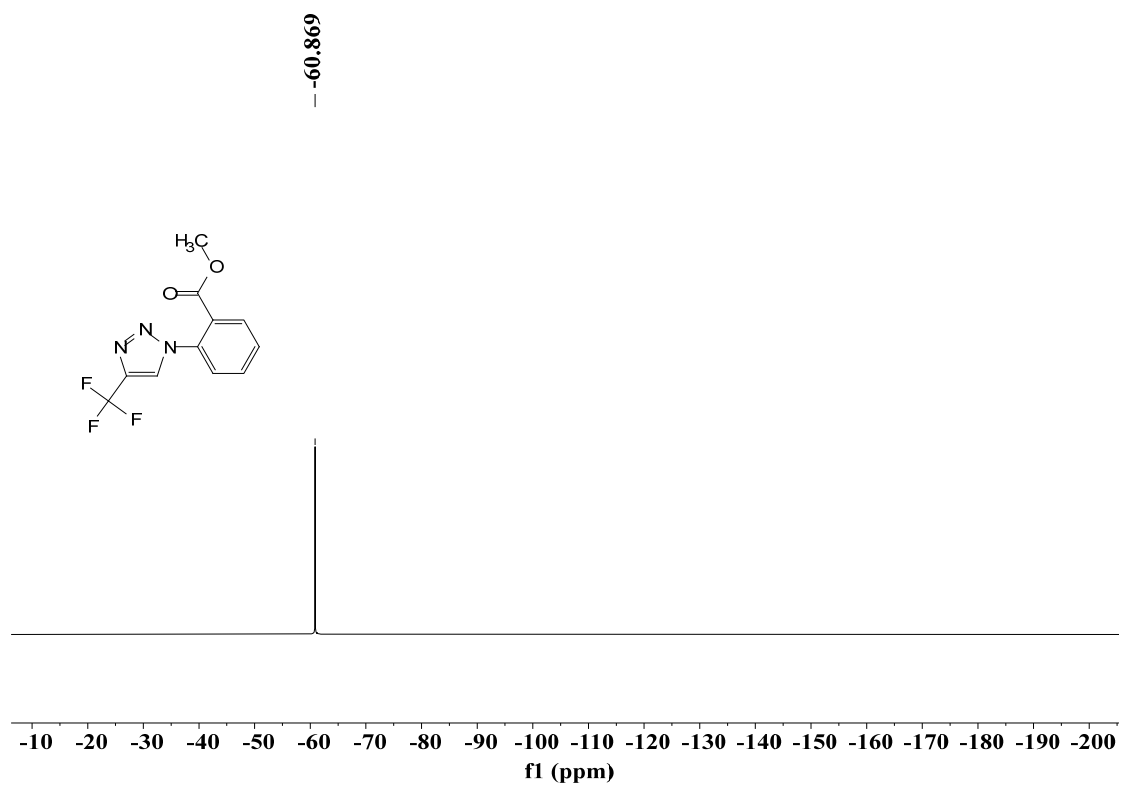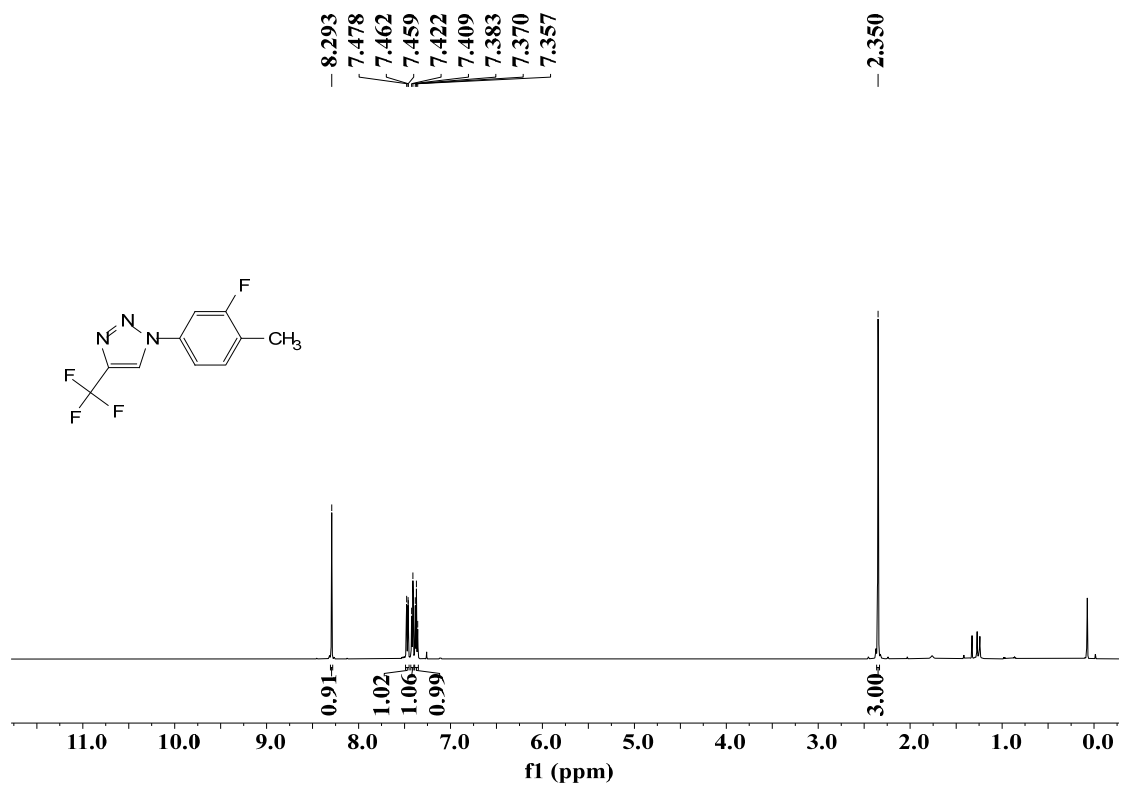

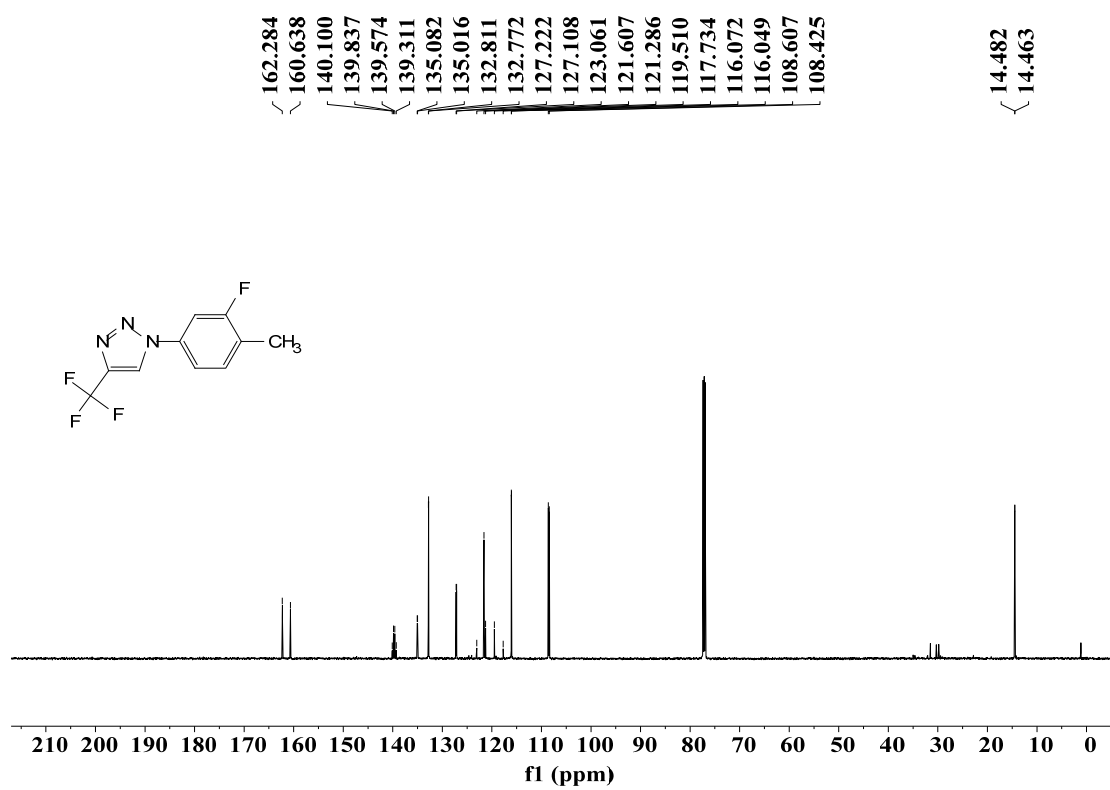

3u-<sup>13</sup>C NMR



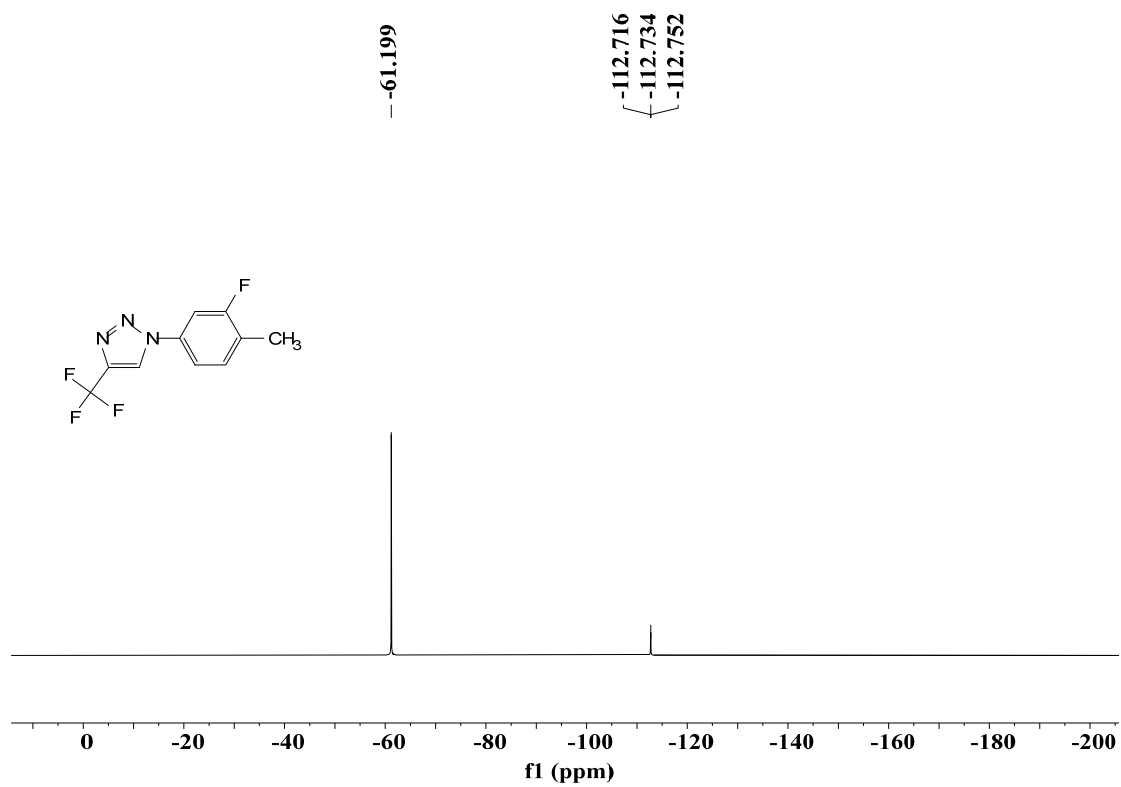

3u- $^{19}\text{F}$  NMR

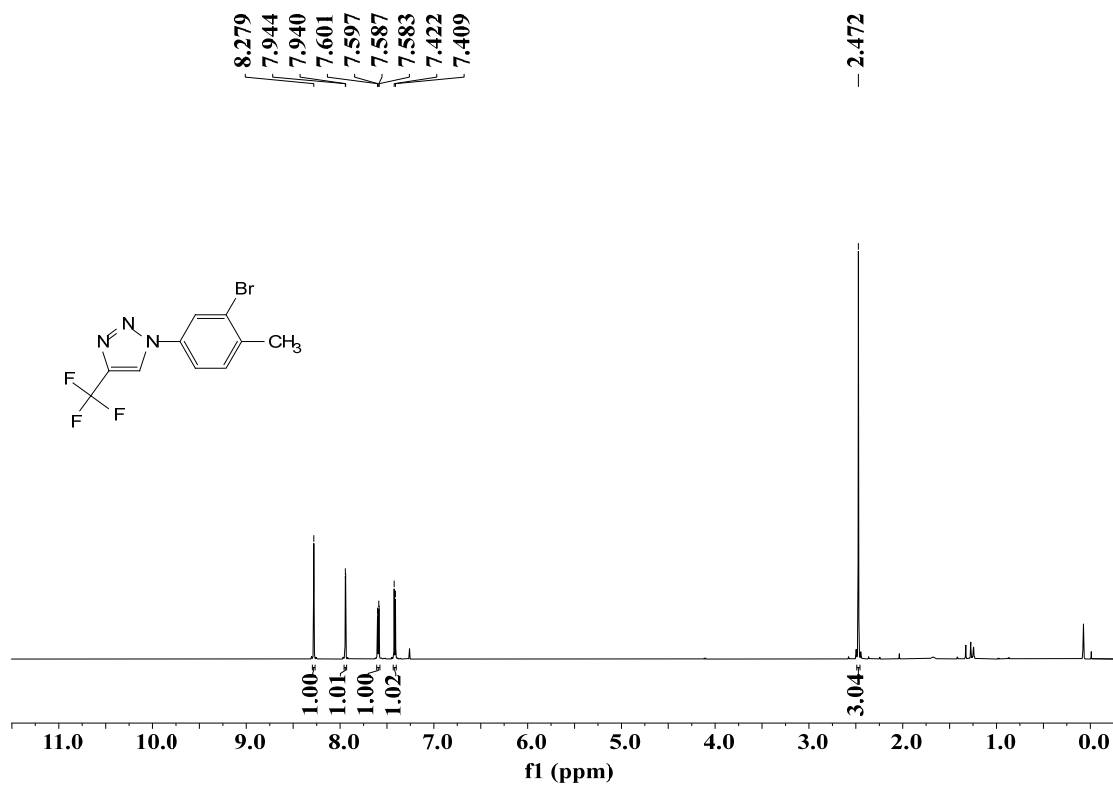

3v- $^1\text{H}$  NMR

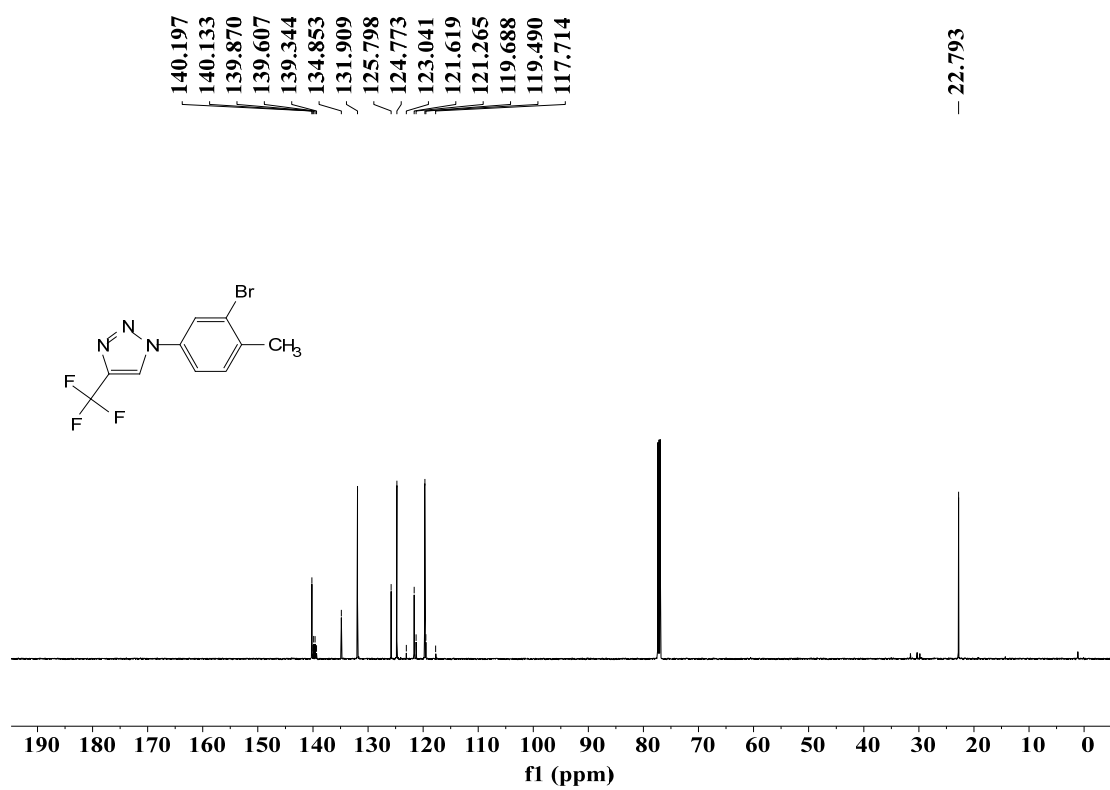

3v-<sup>13</sup>C NMR

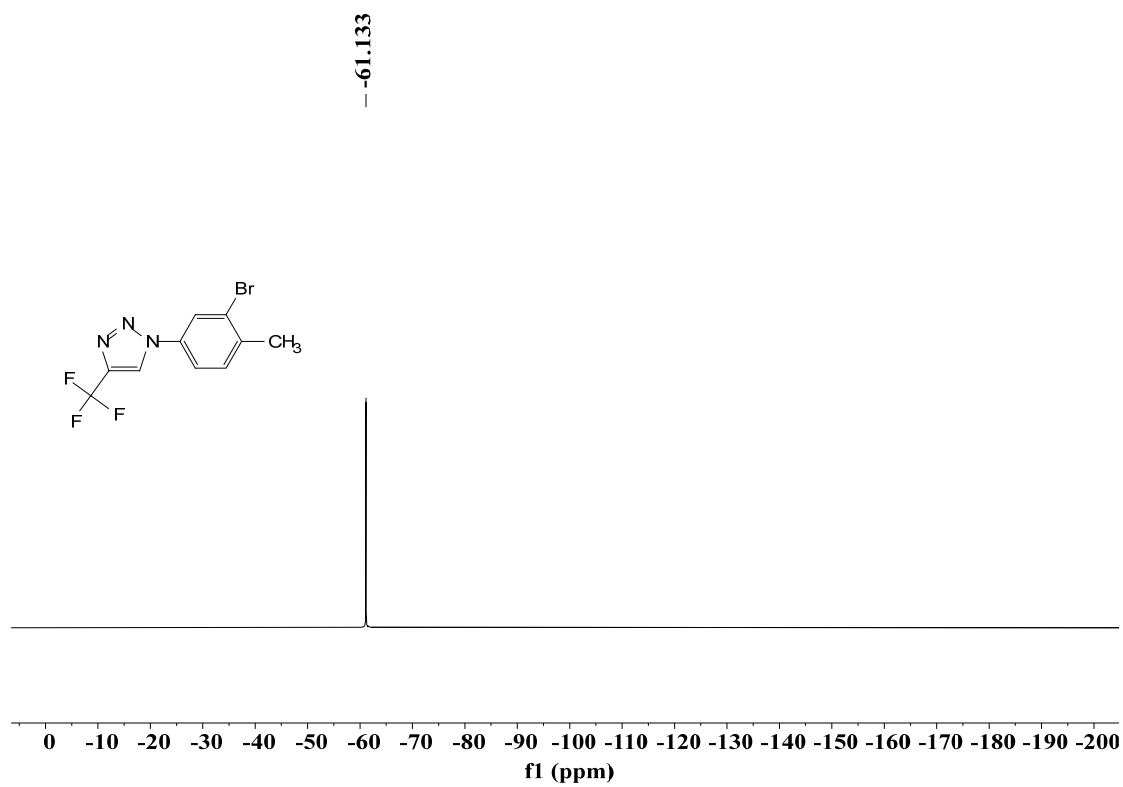

**3v-<sup>19</sup>F NMR**

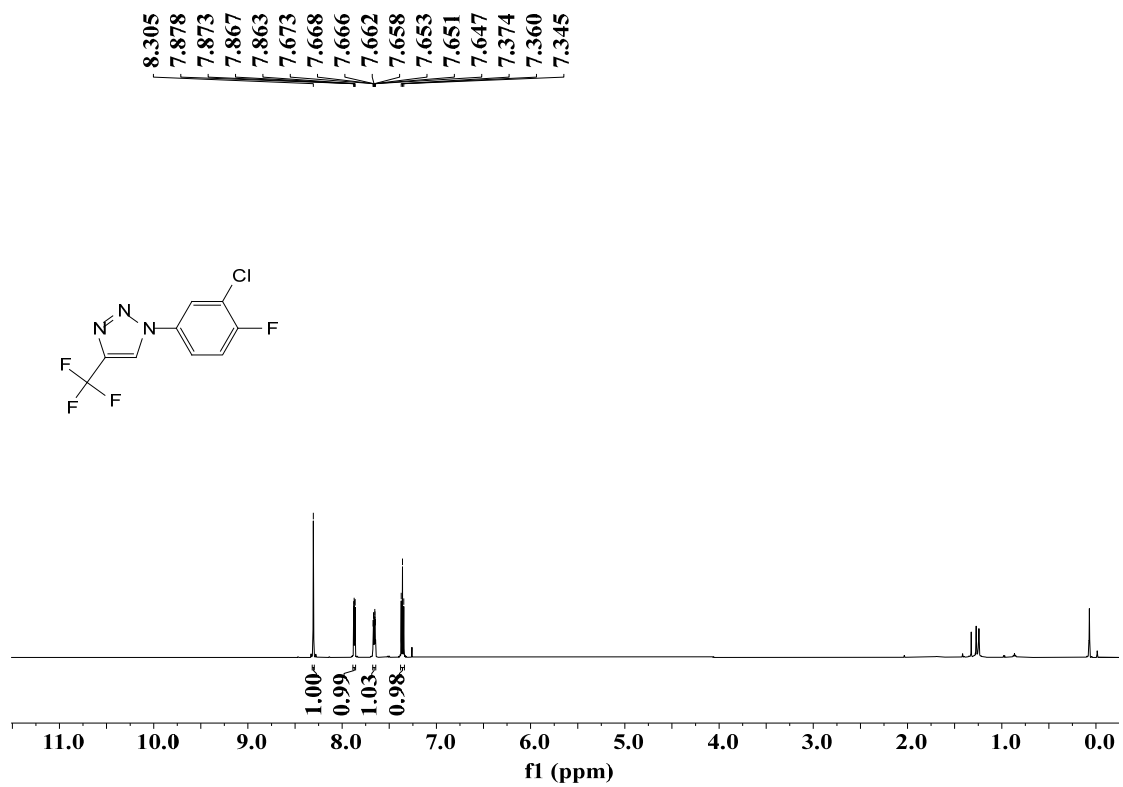

**3w-<sup>1</sup>H NMR**

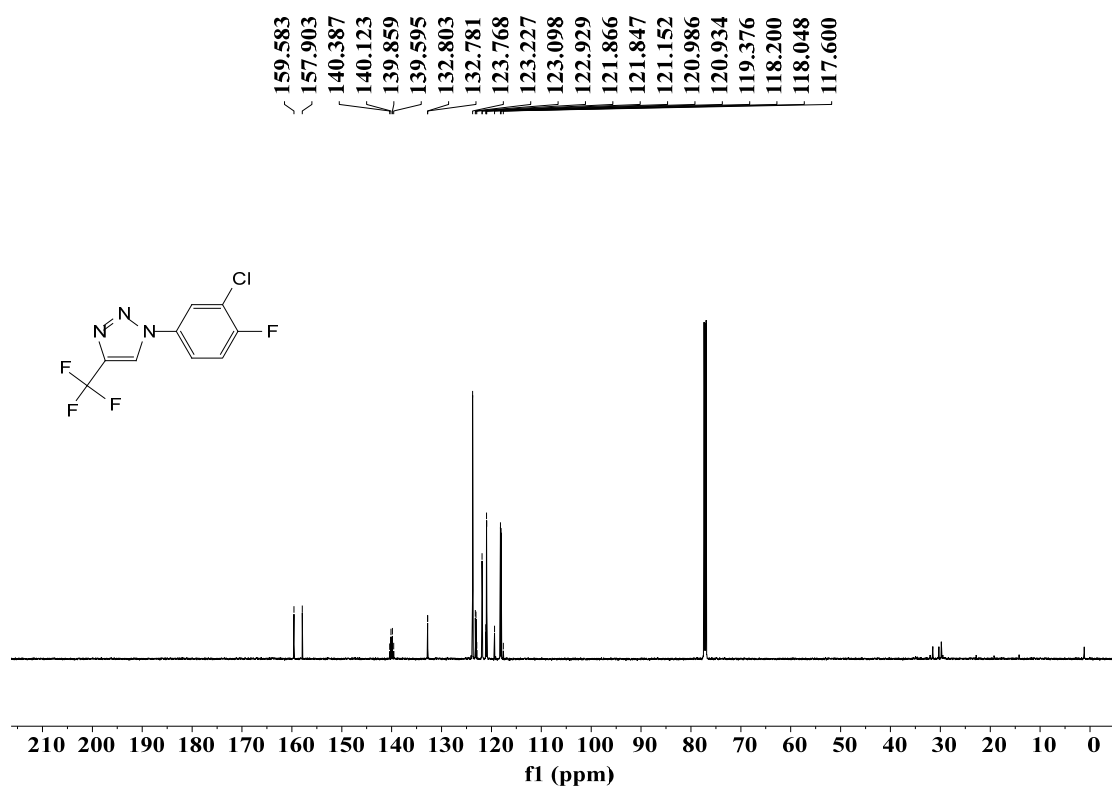

3w-<sup>13</sup>C NMR

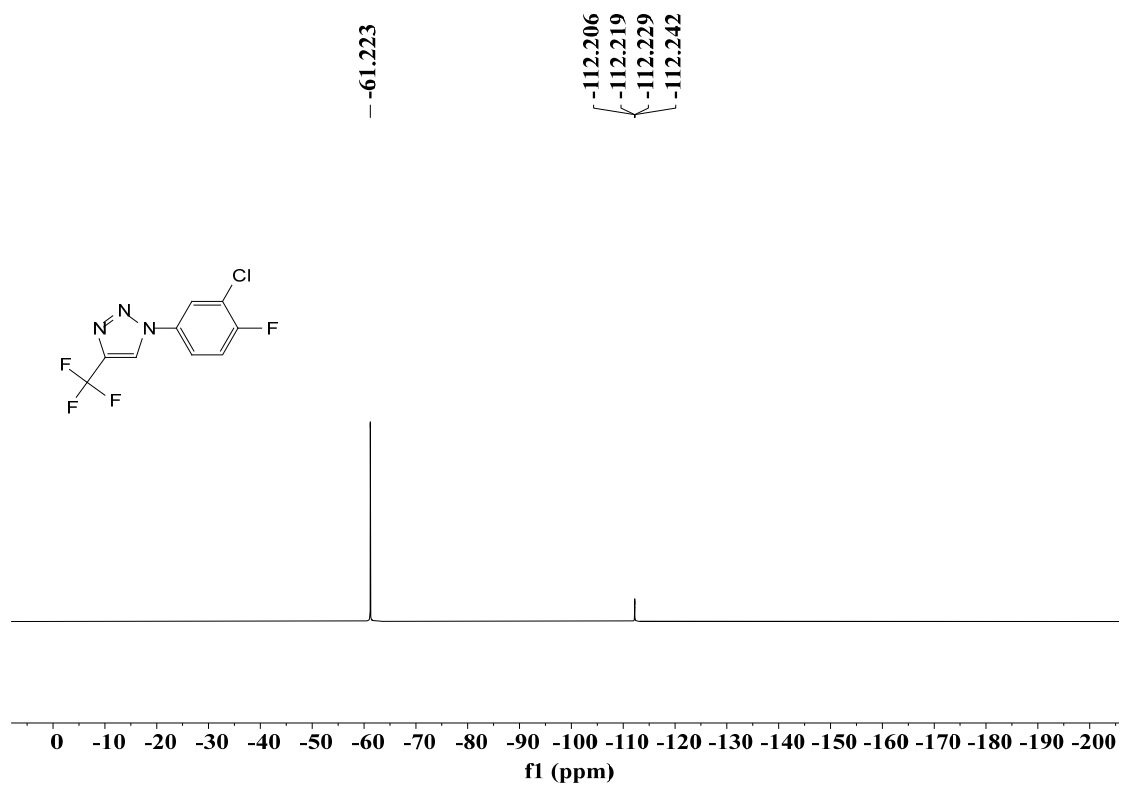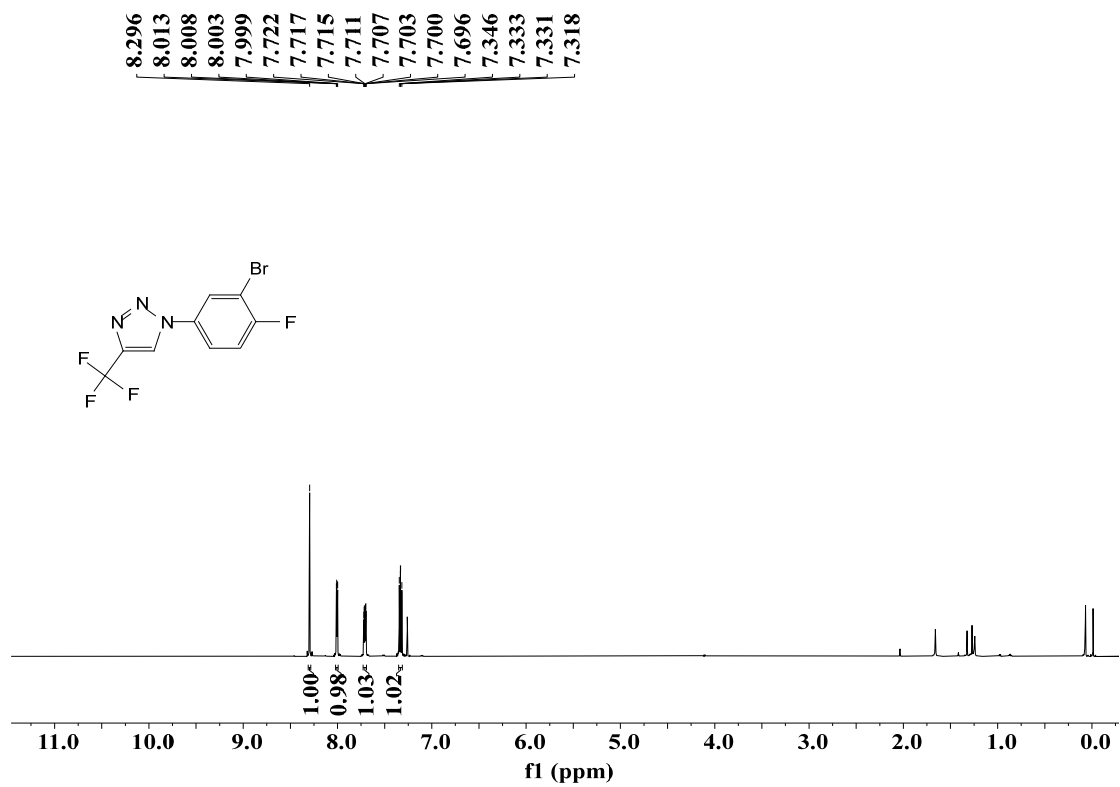

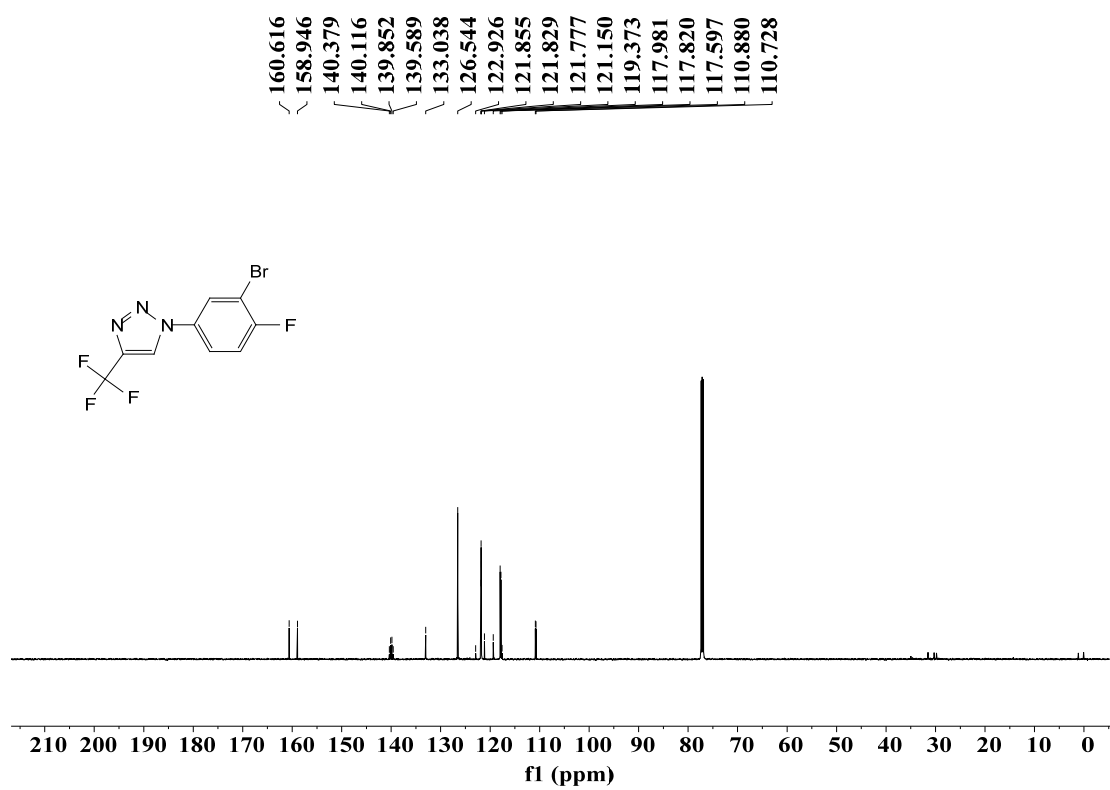

$3\times$ - $^{13}\text{C}$  NMR

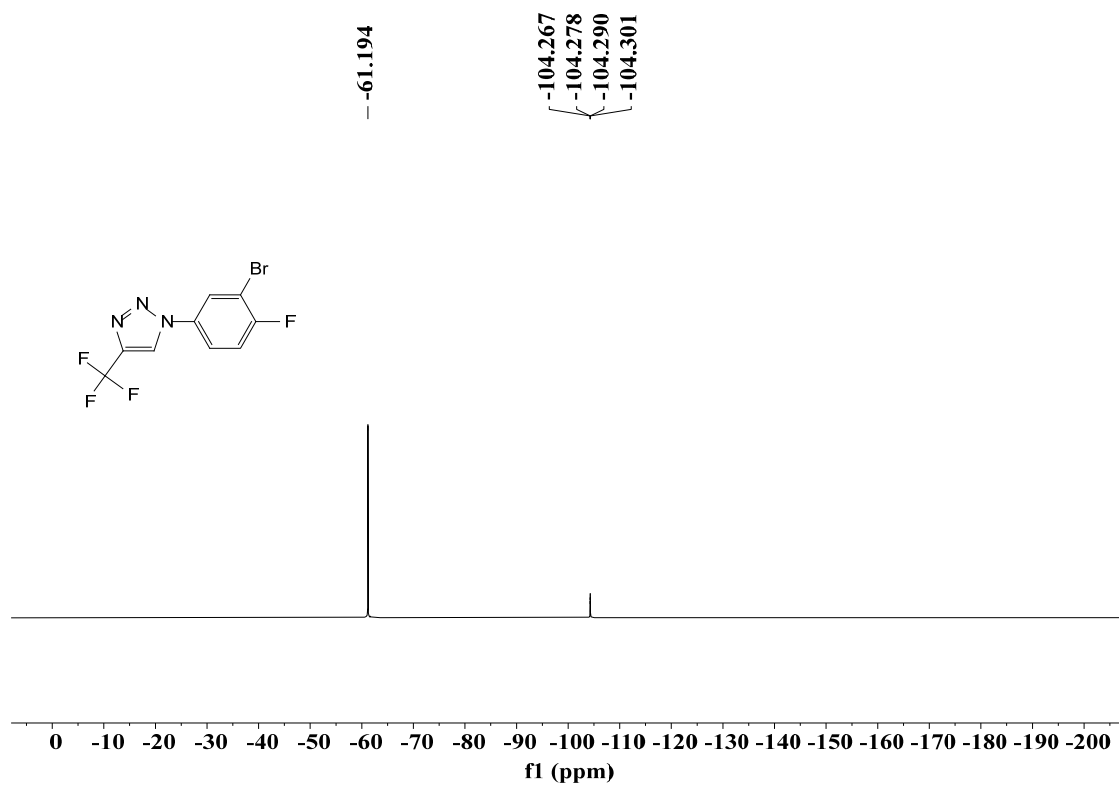

3x- $^{19}\text{F}$  NMR

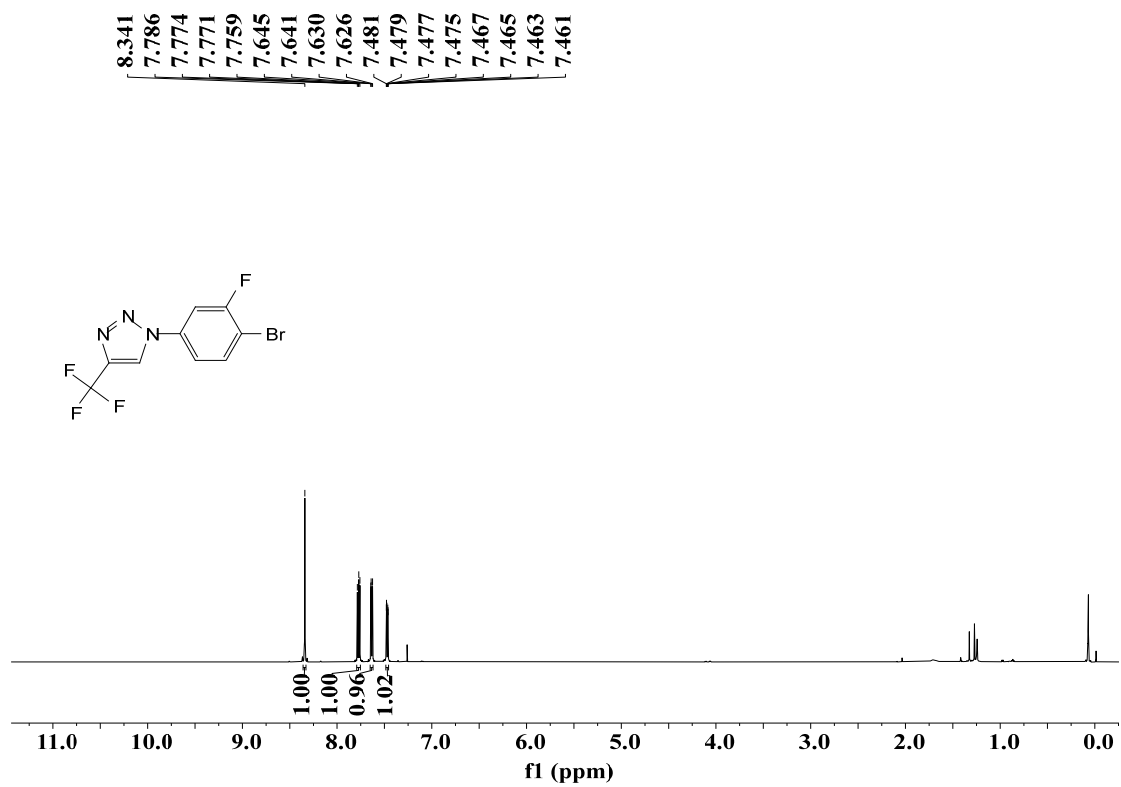

3y- $^1\text{H}$  NMR

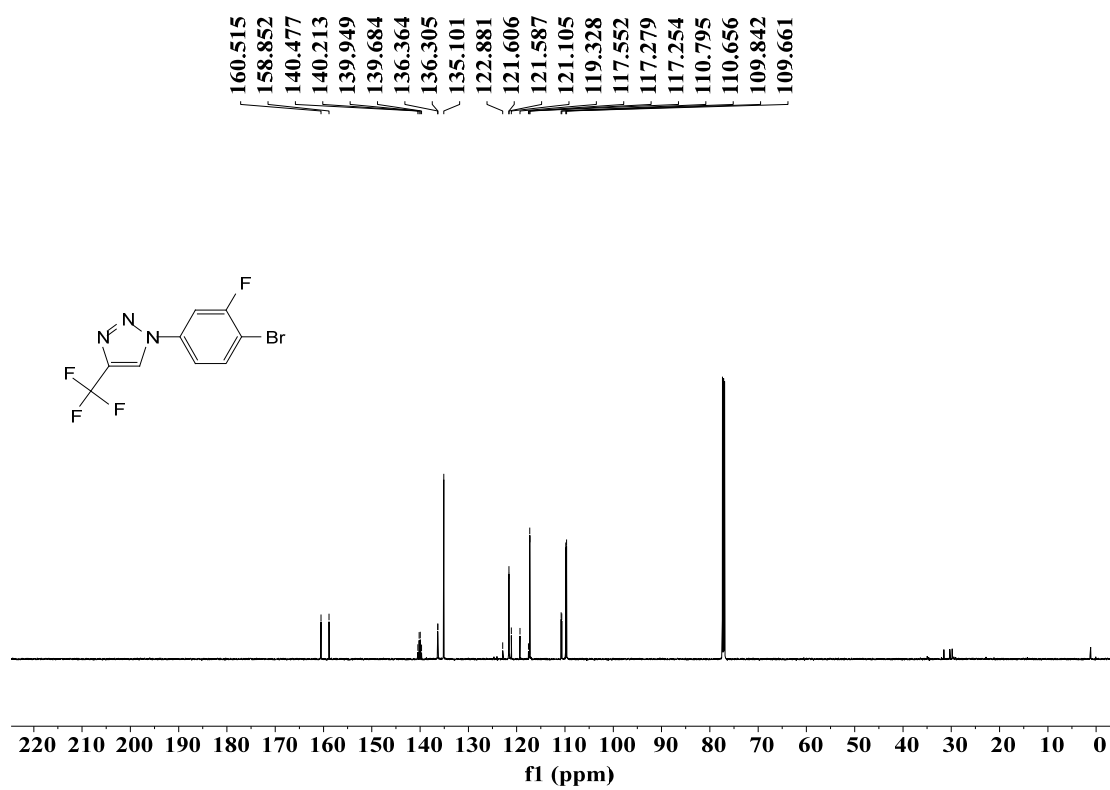

<sup>3</sup>y-<sup>13</sup>C NMR



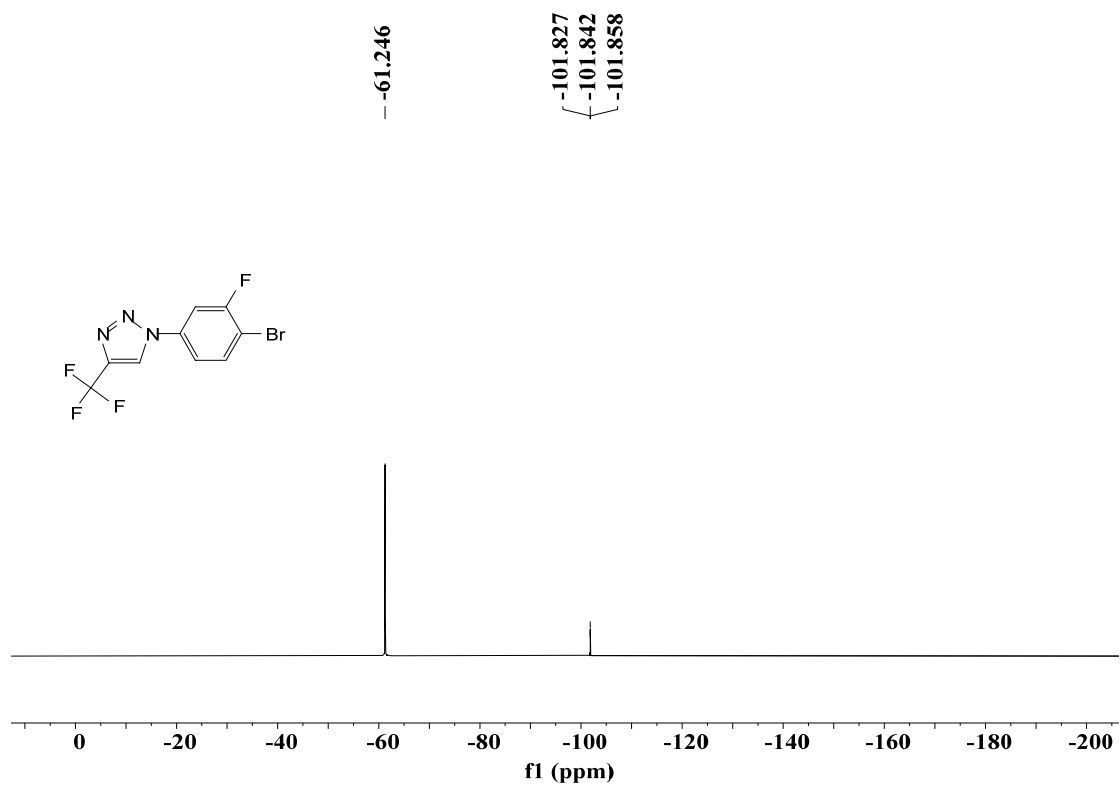

3y- $^{19}\text{F}$  NMR

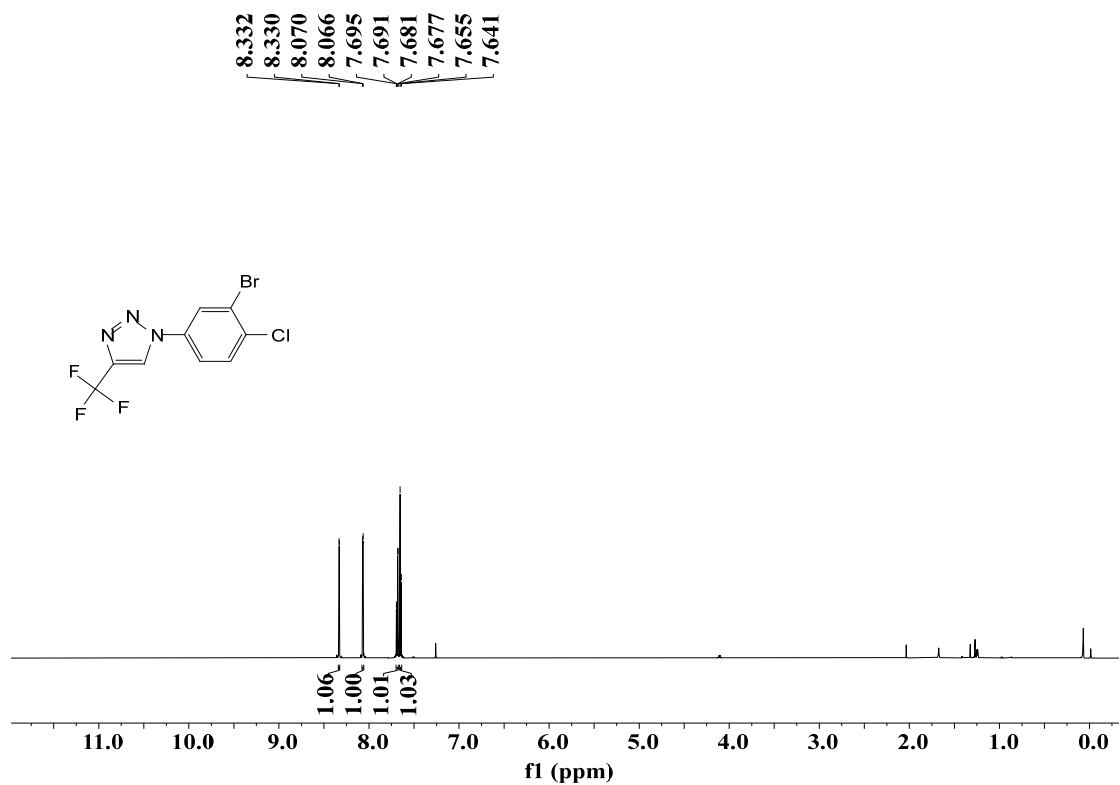

3z- $^1\text{H}$  NMR

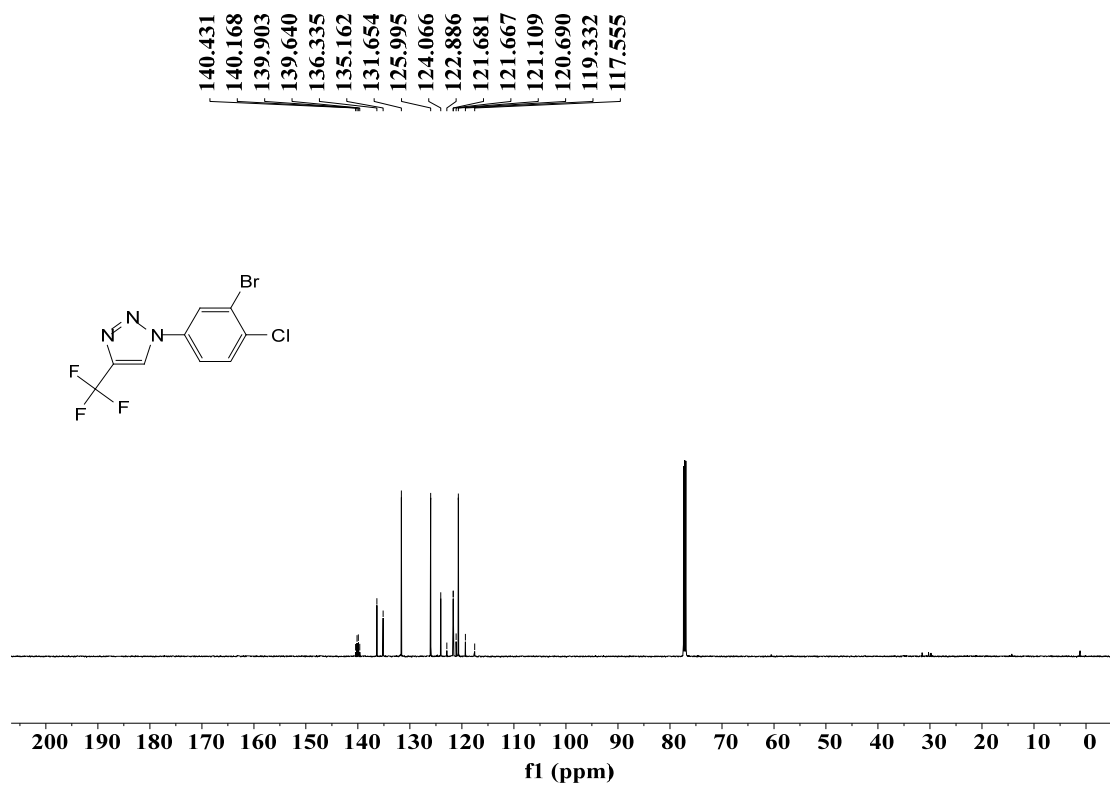

3z-<sup>13</sup>C NMR

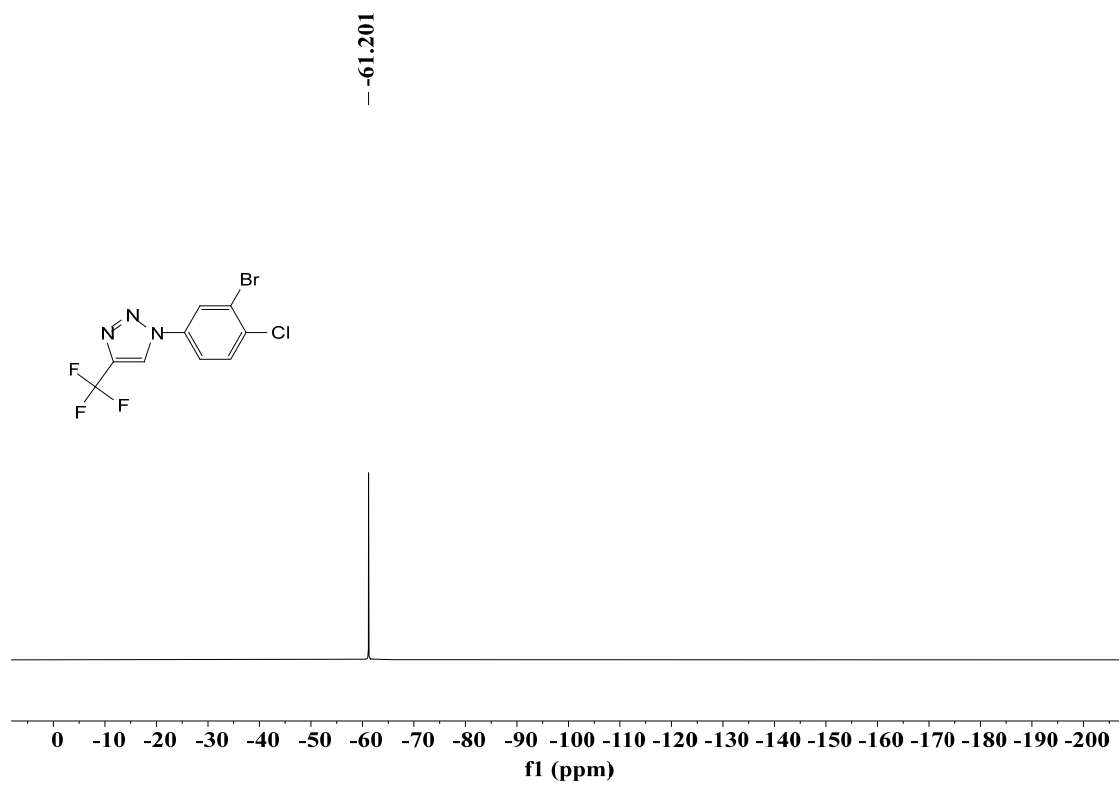

**3z-<sup>19</sup>F NMR**

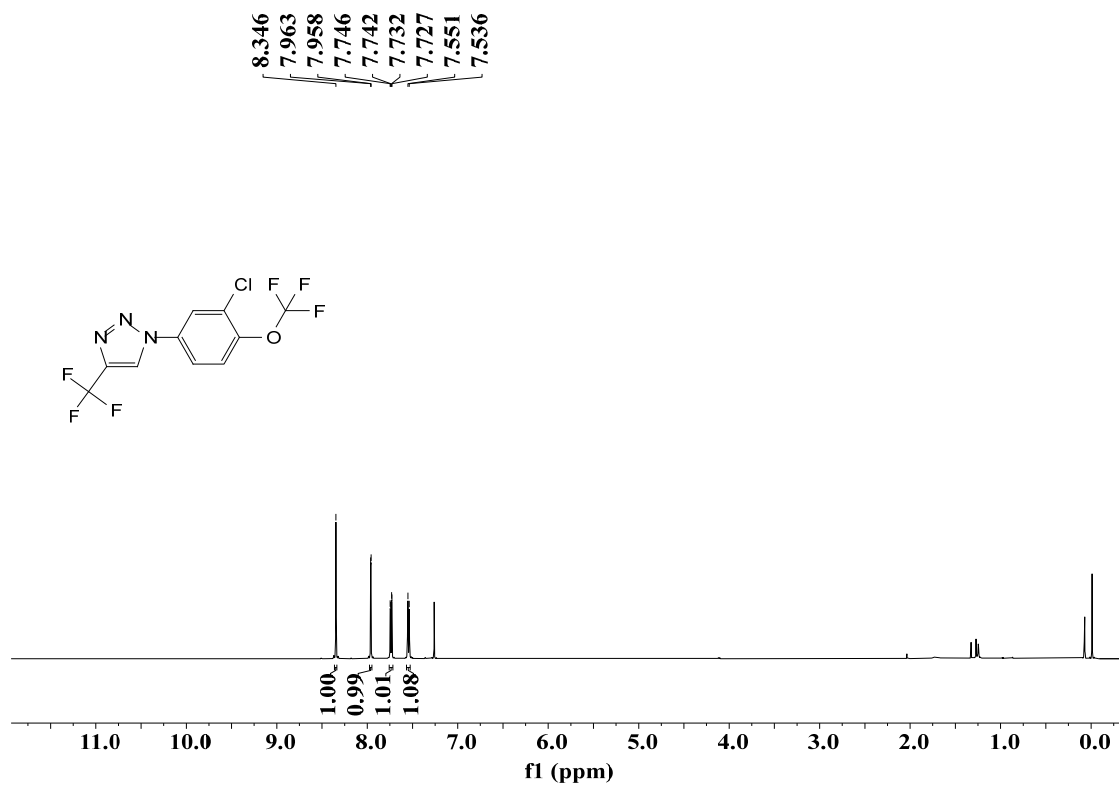

**3aa-<sup>1</sup>H NMR**

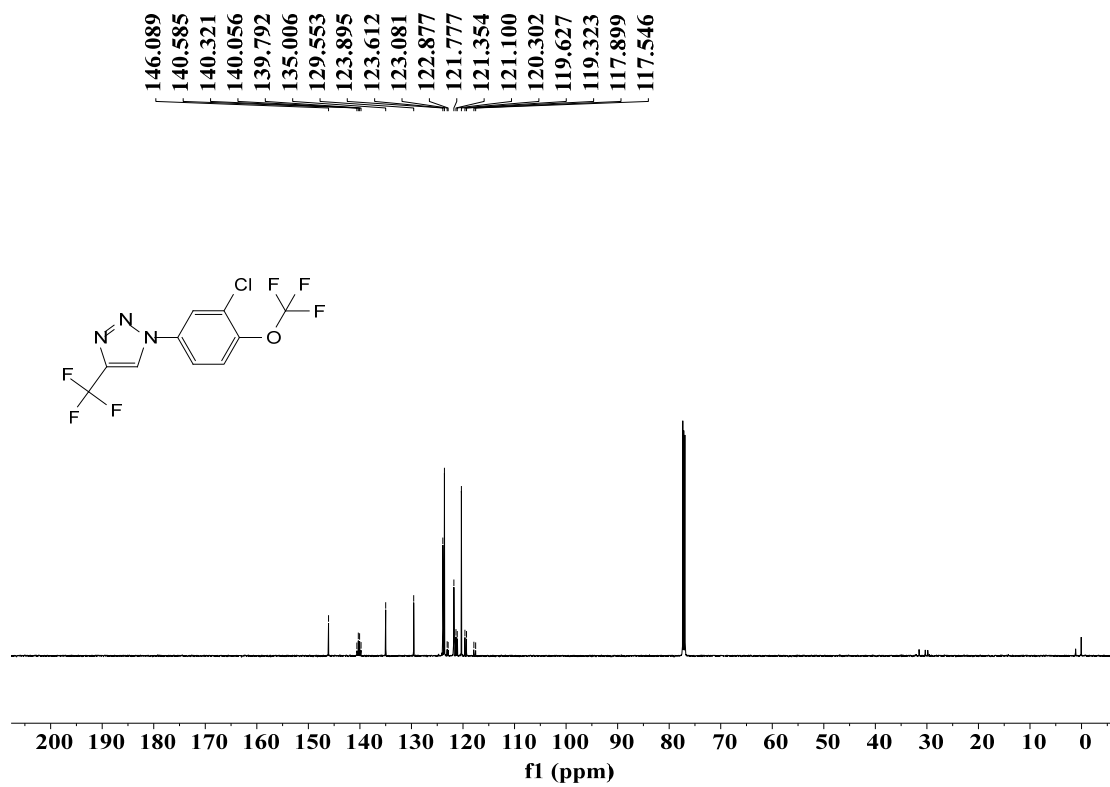

3aa-<sup>13</sup>C NMR

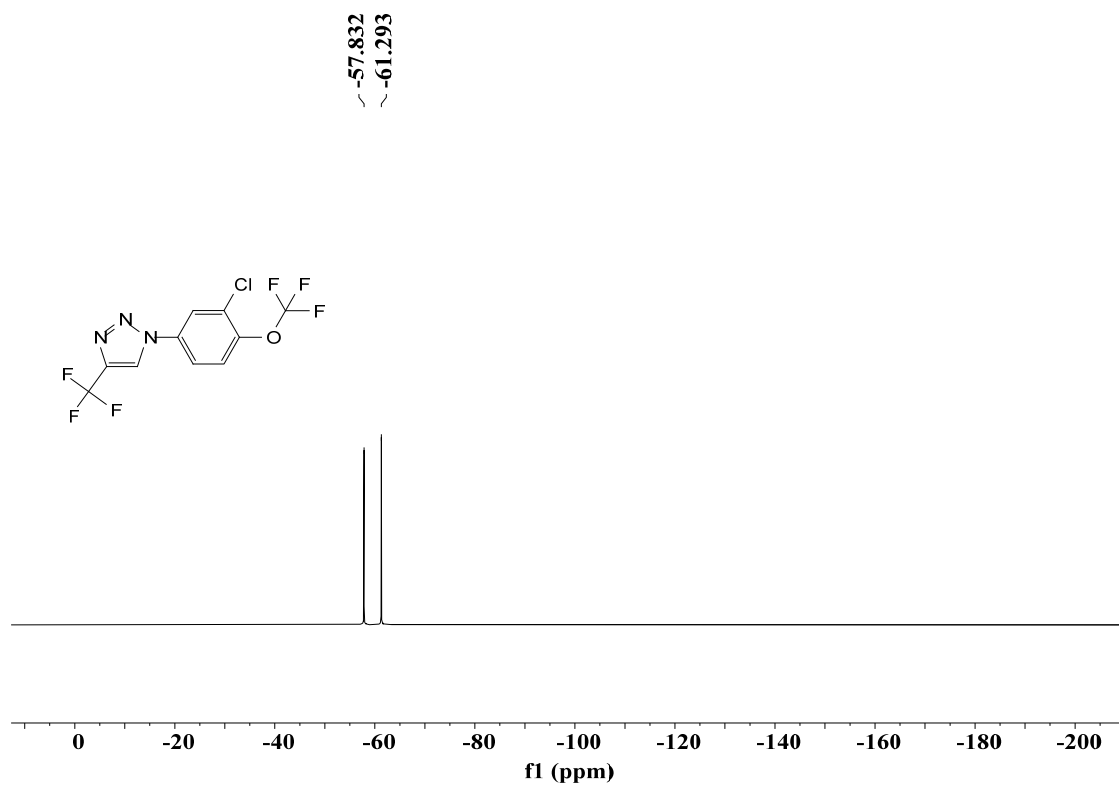

3aa- $^{19}\text{F}$  NMR

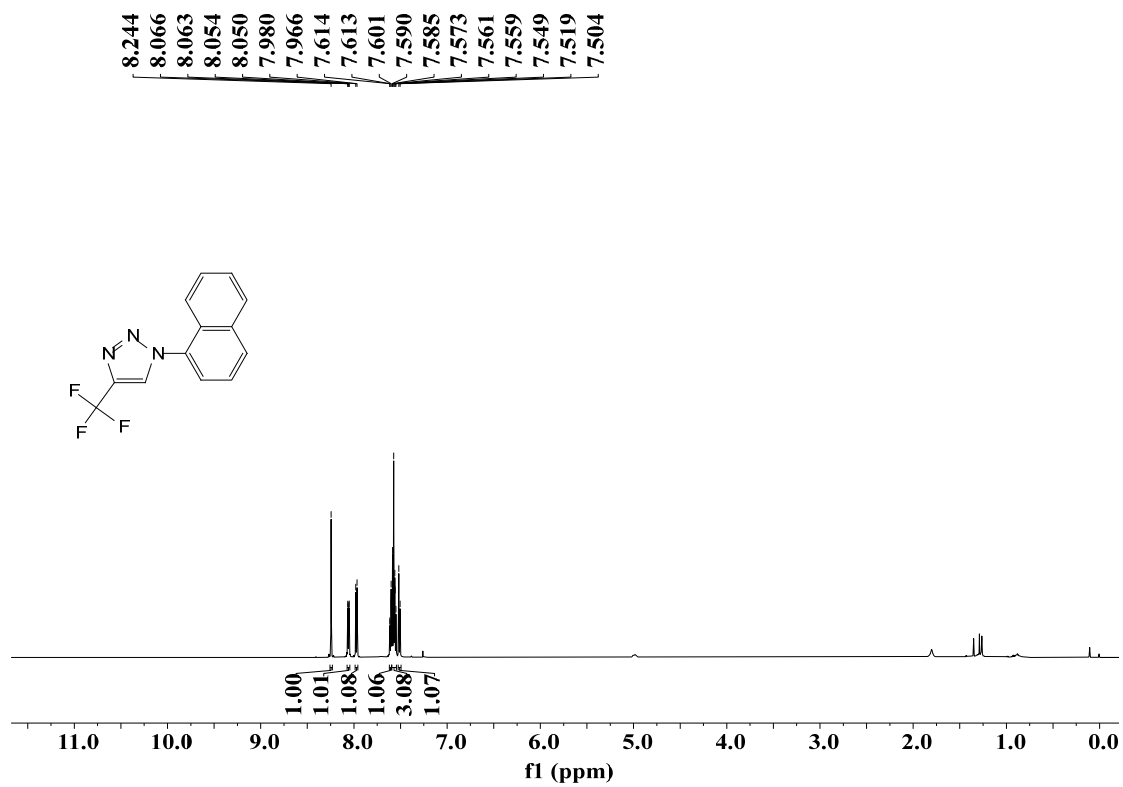

3ab- $^1\text{H}$  NMR

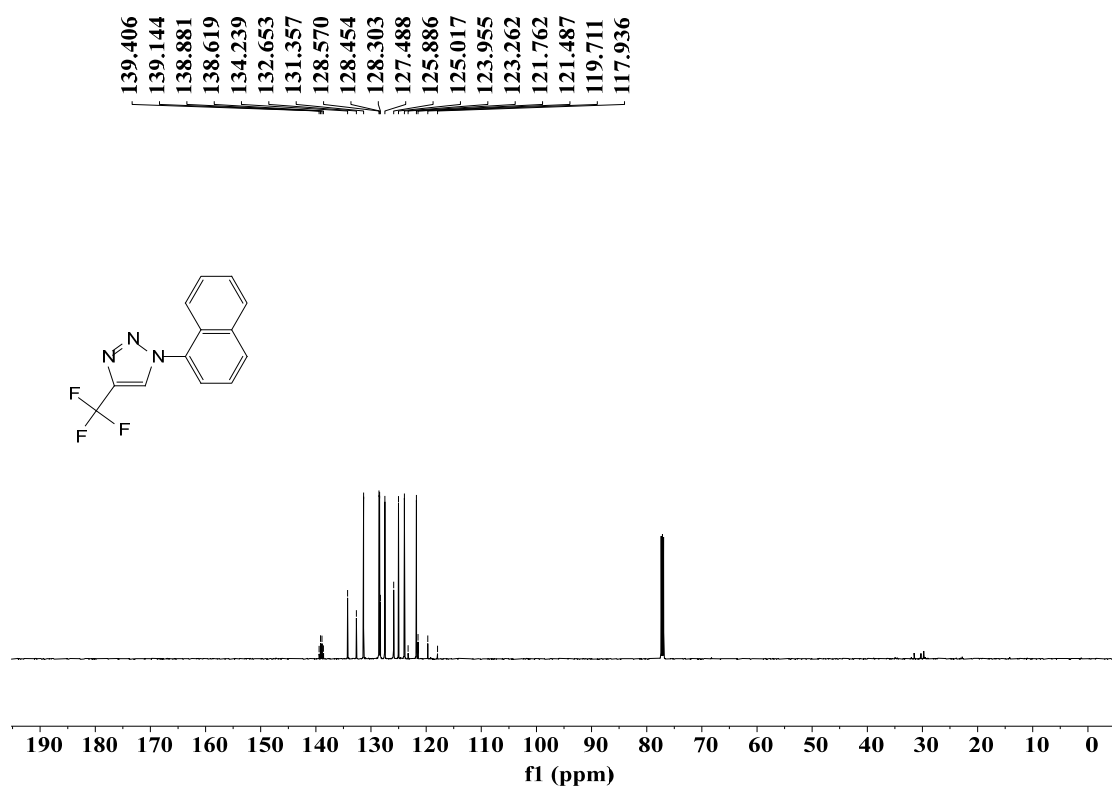

3ab-<sup>13</sup>C NMR

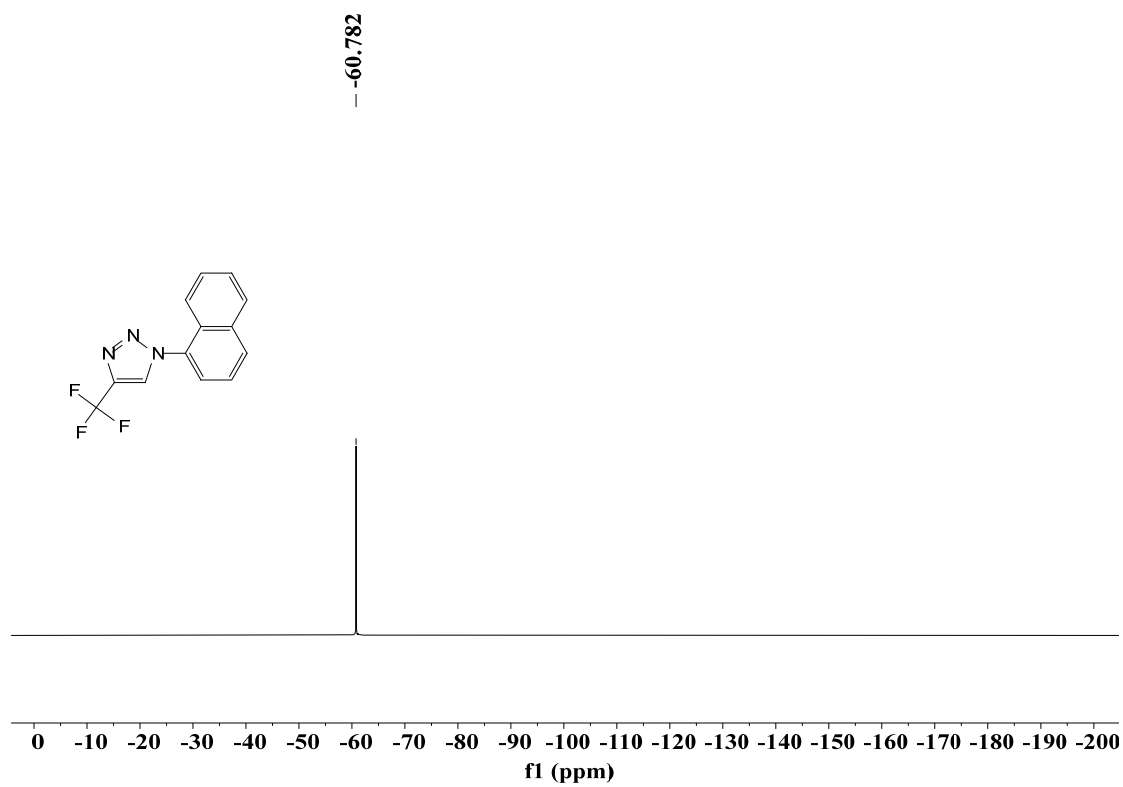

**3ab- $^{19}\text{F}$  NMR**

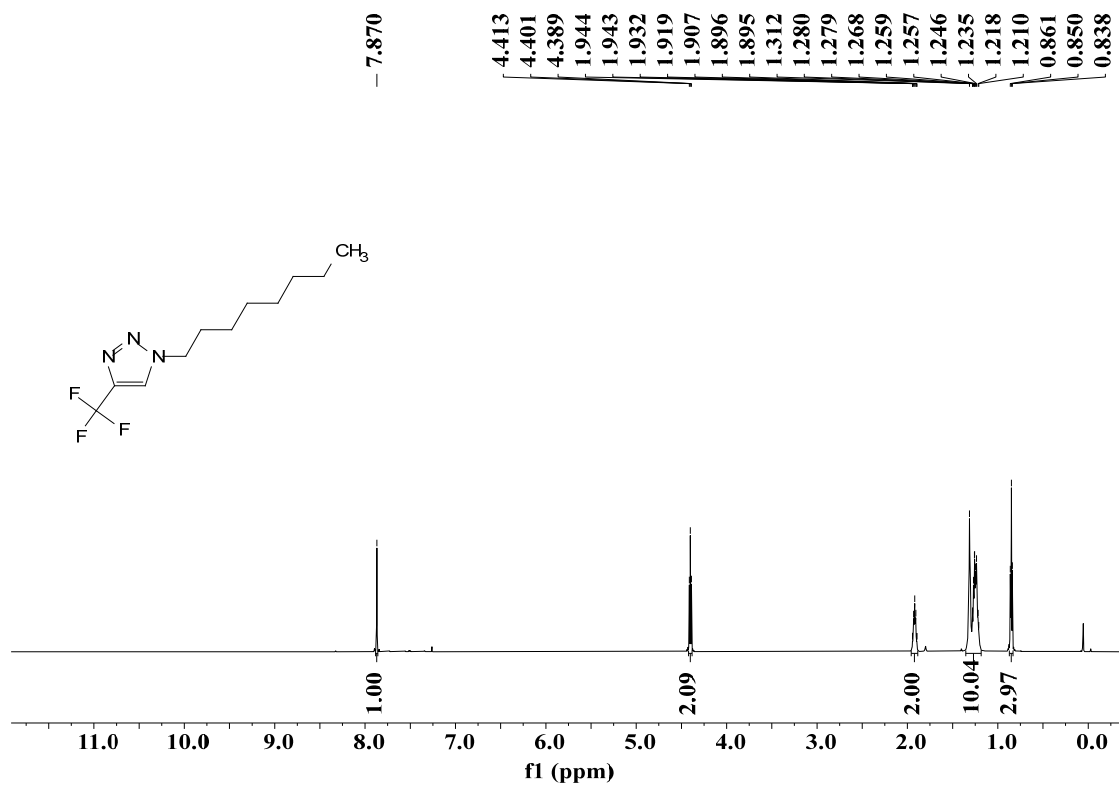

4a-<sup>1</sup>H NMR

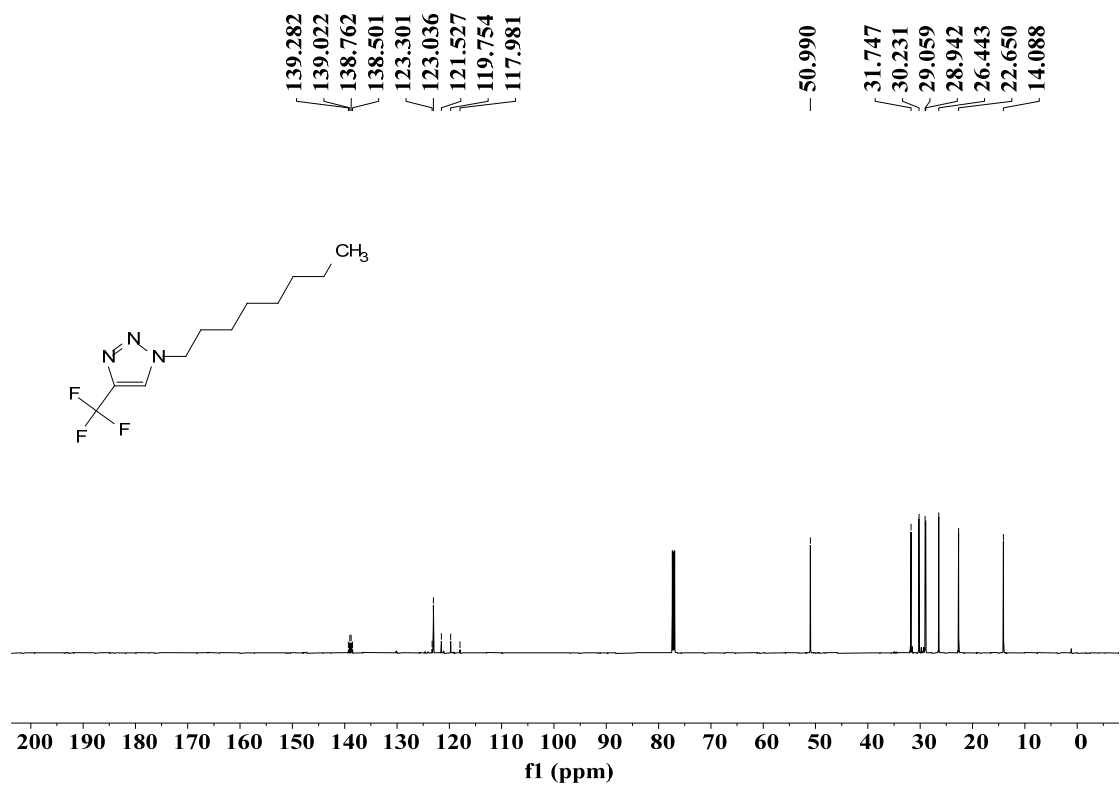

4a-<sup>13</sup>C NMR



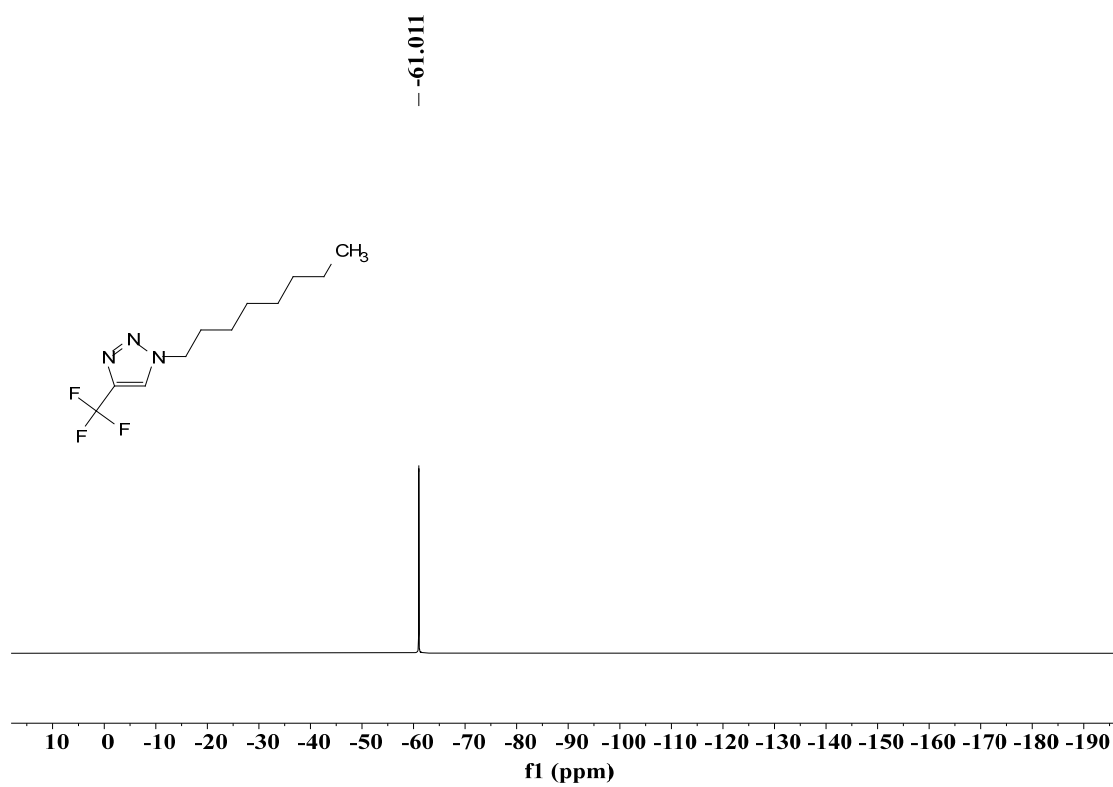

**4a- $^{19}\text{F}$  NMR**

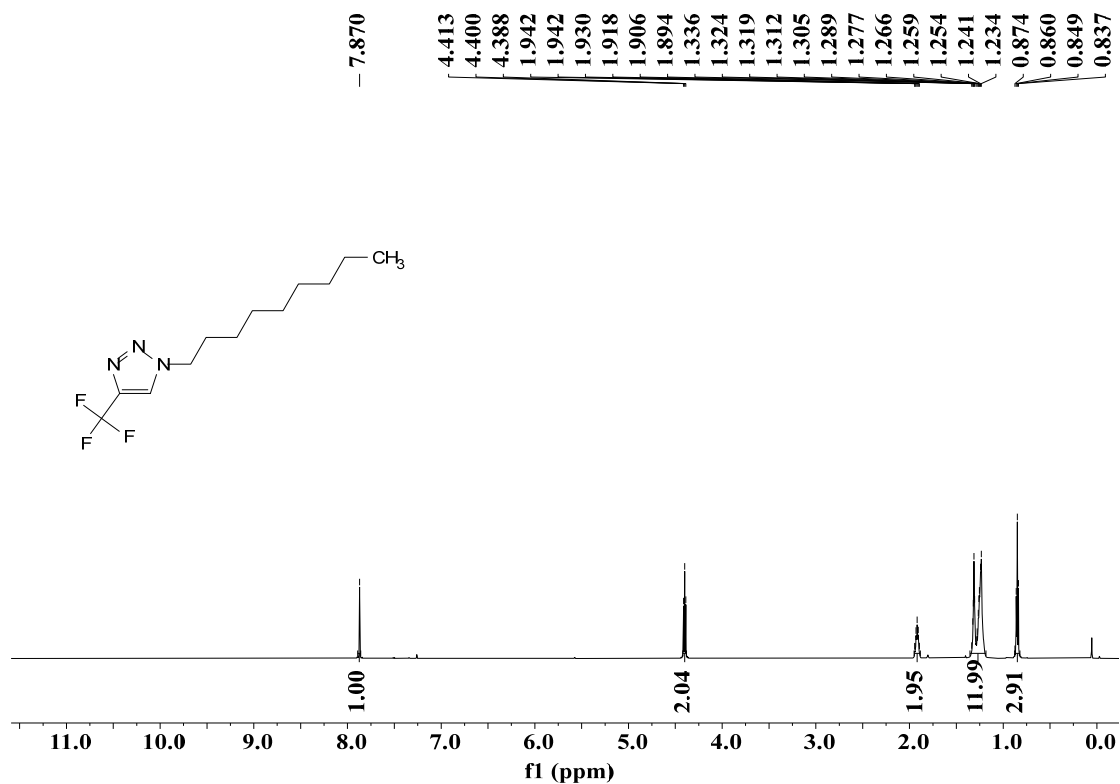

4b- $^1\text{H}$  NMR

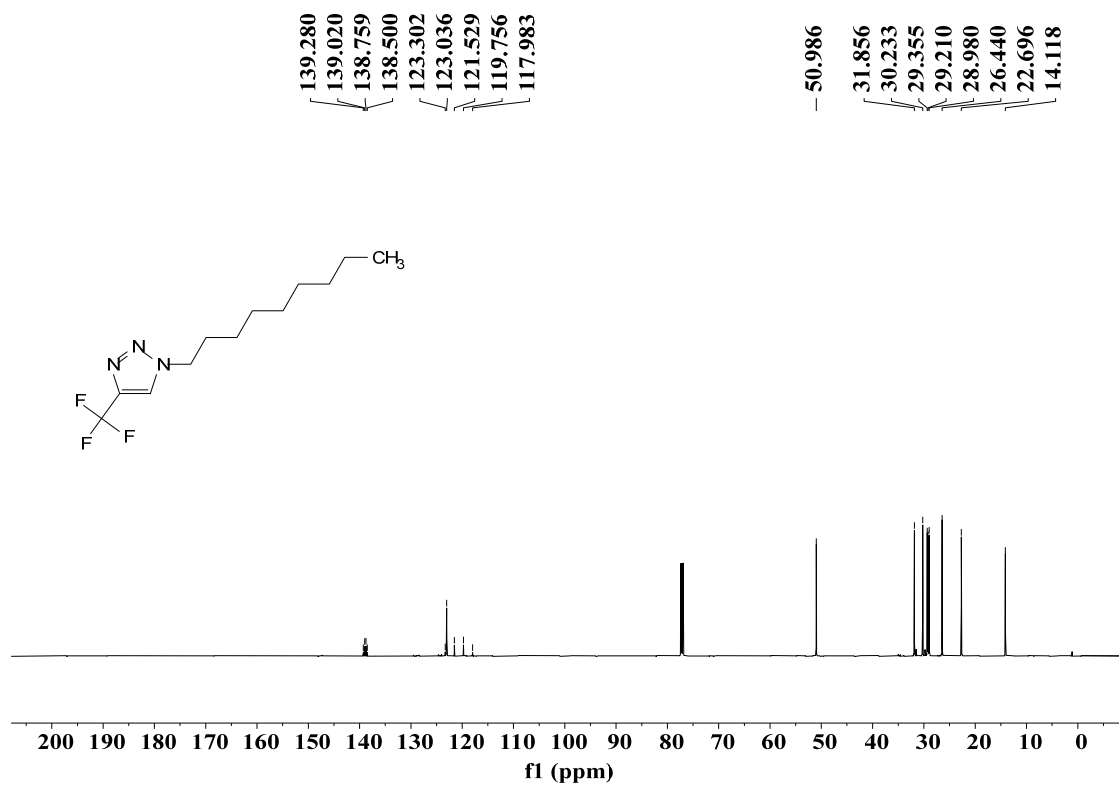

4b- $^{13}\text{C}$  NMR

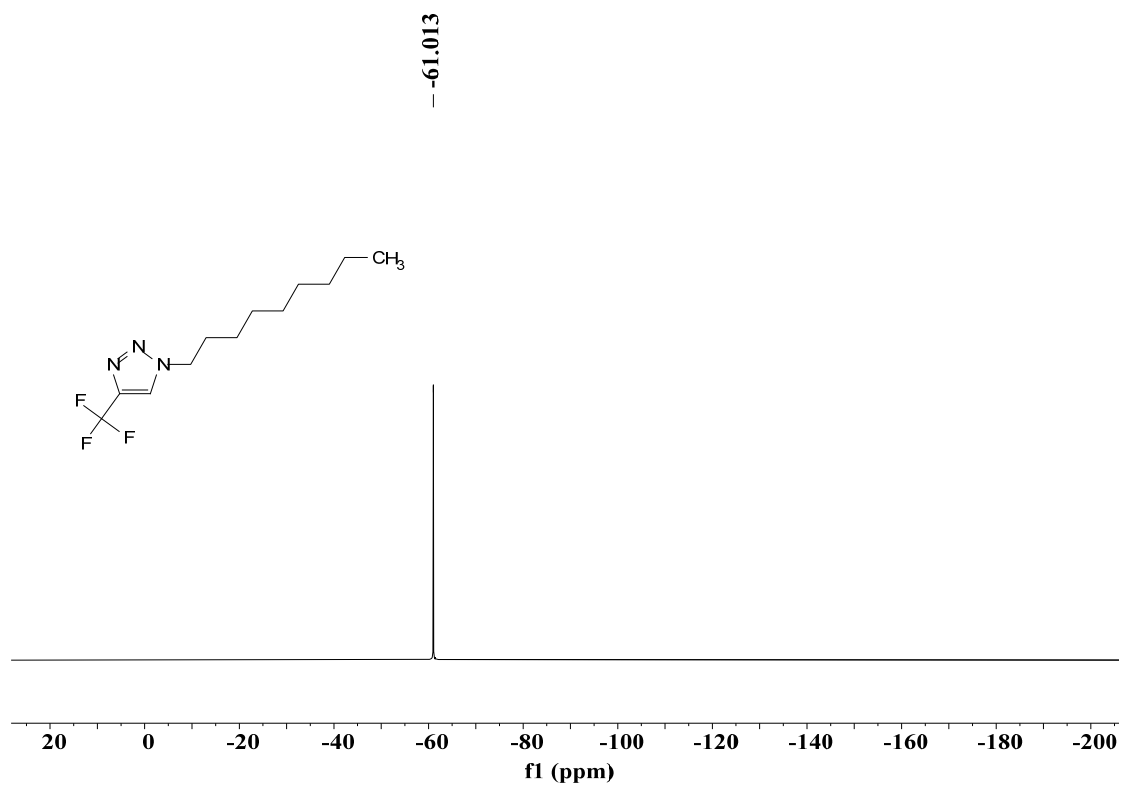

**4b- $^{19}\text{F}$  NMR**

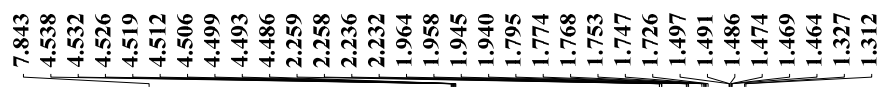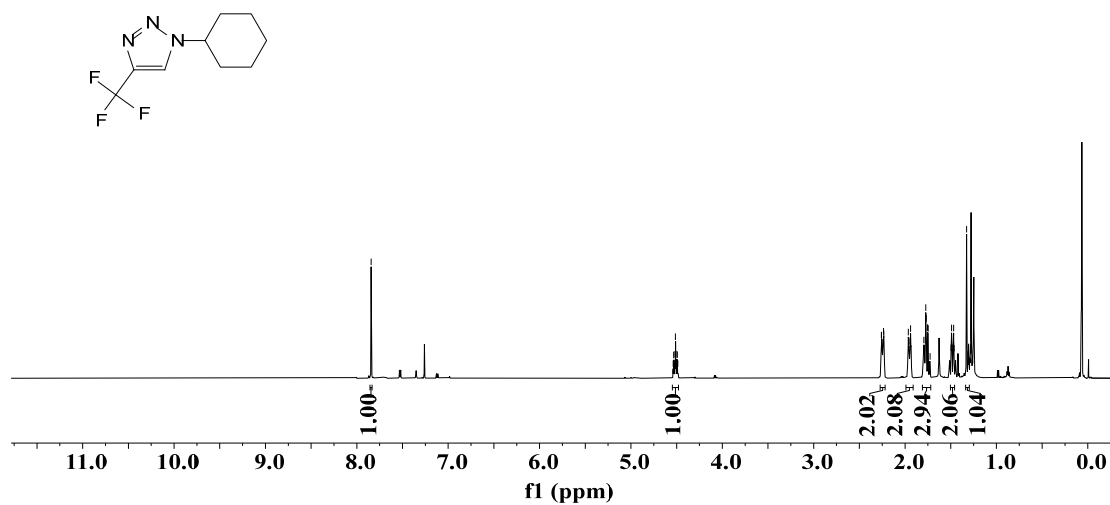

**4c- $^1\text{H}$  NMR**

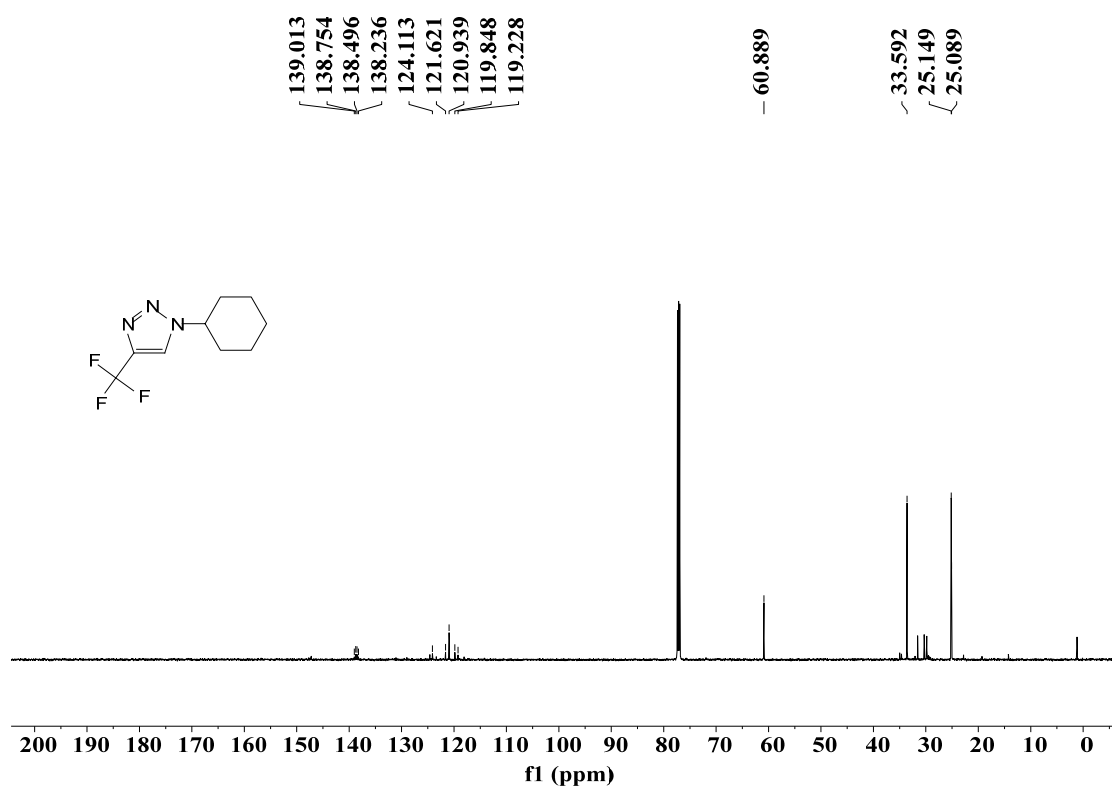

4c- $^{13}\text{C}$  NMR

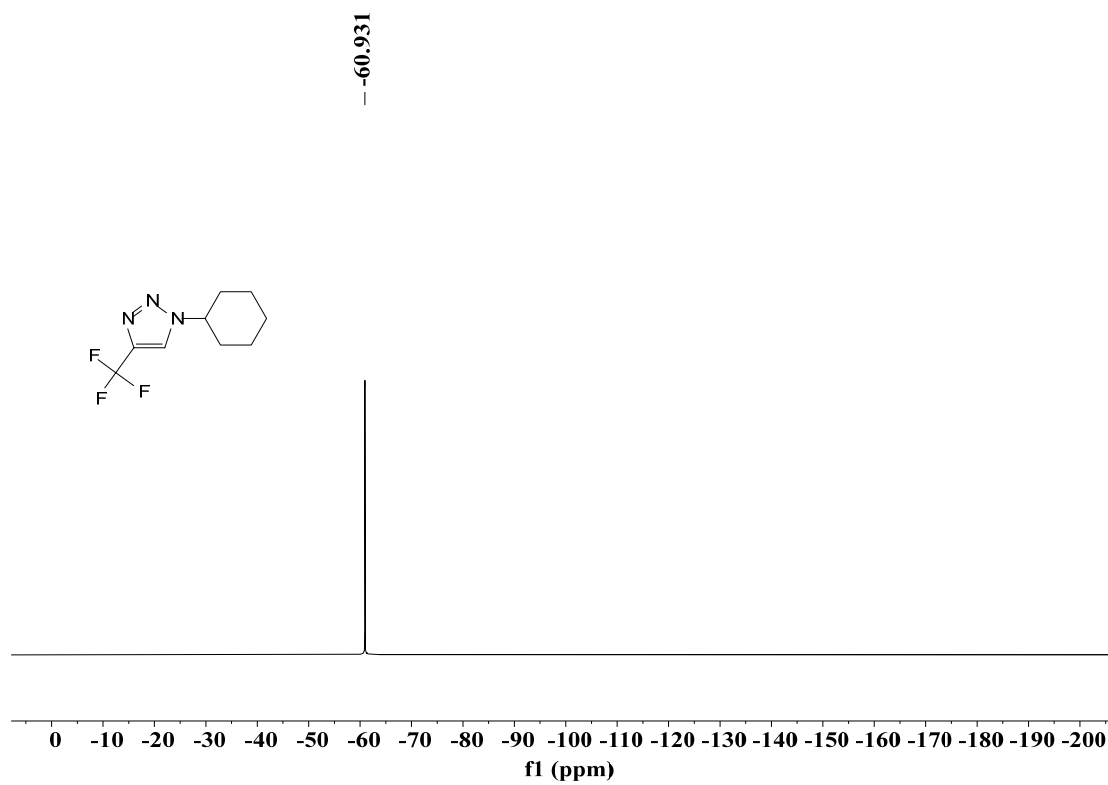

4c- $^{19}\text{F}$  NMR

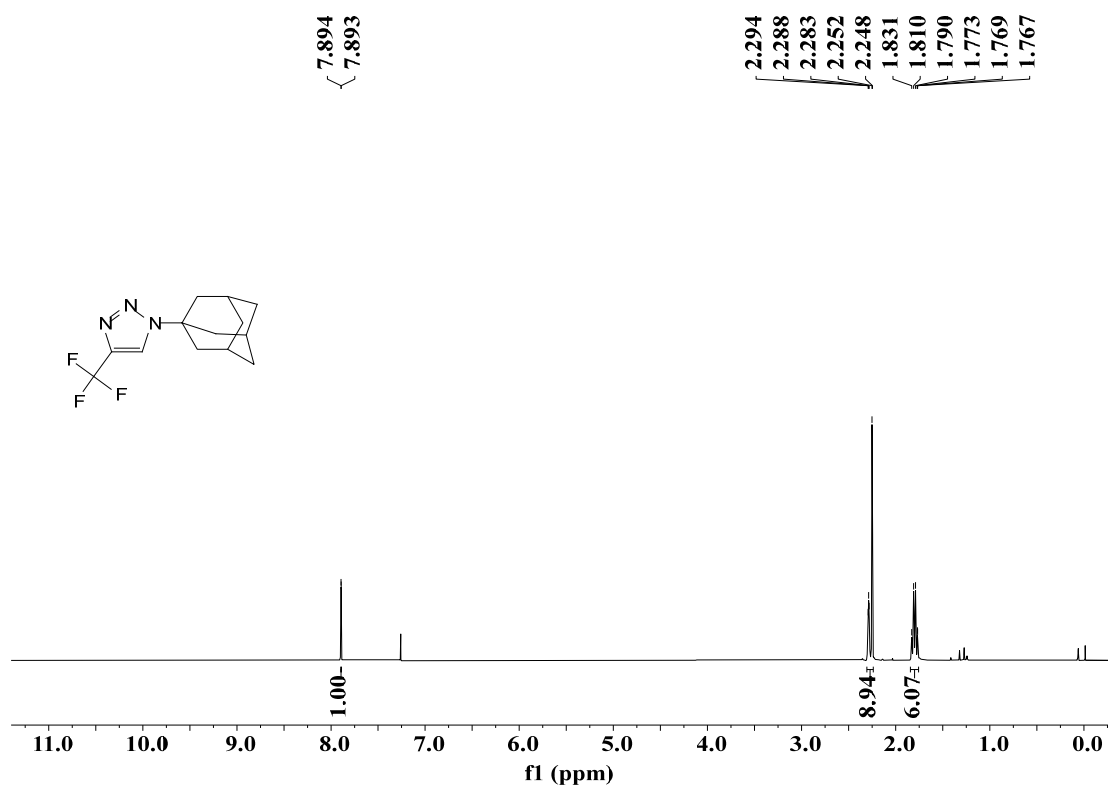

4d- $^1\text{H}$  NMR

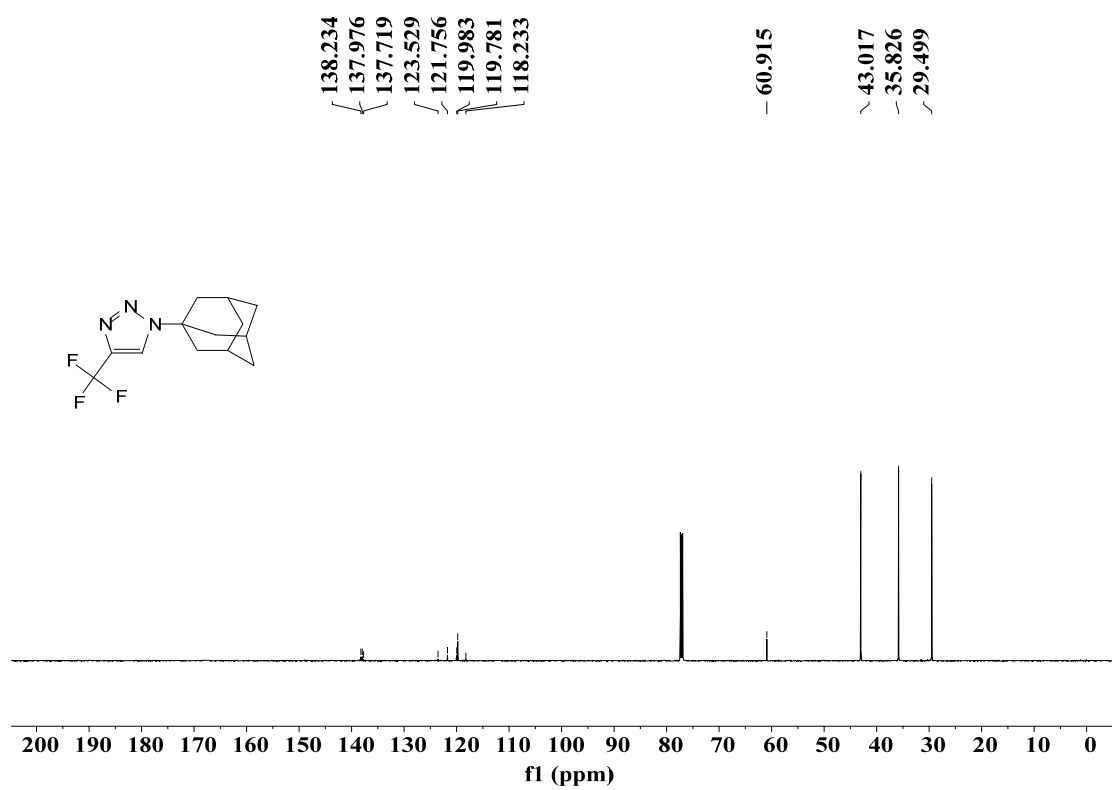

4d-<sup>13</sup>C NMR

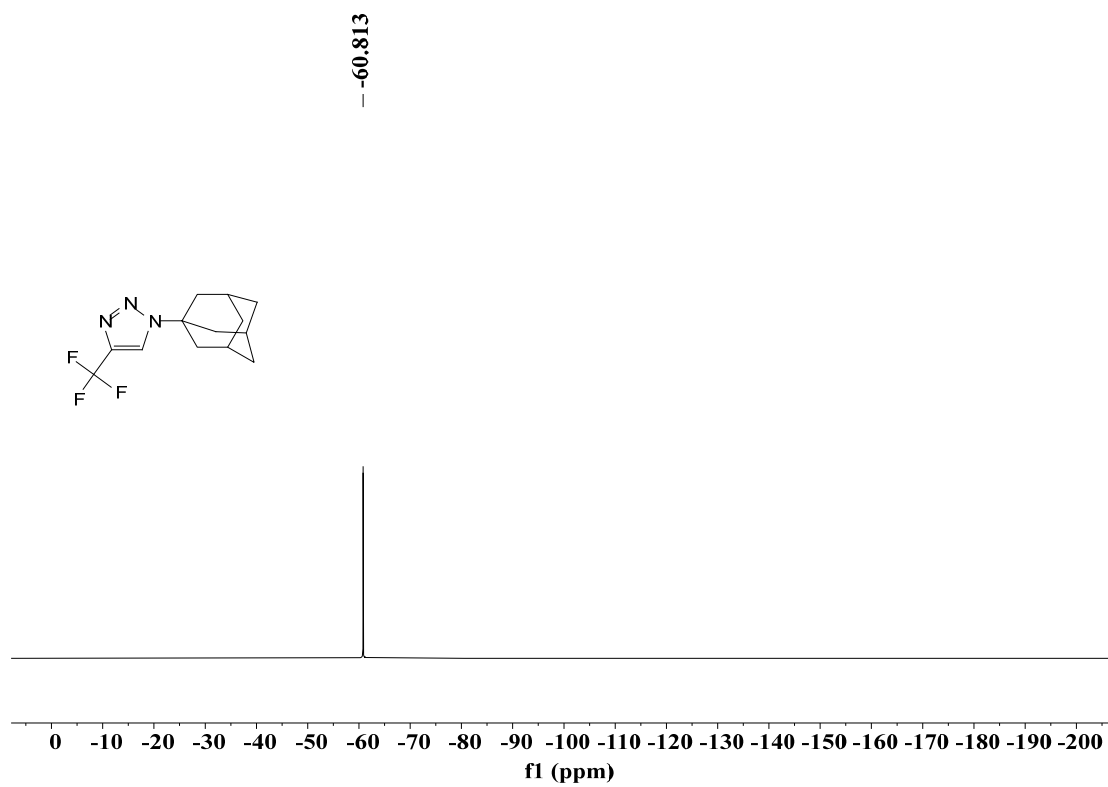

**4d-<sup>19</sup>F NMR**

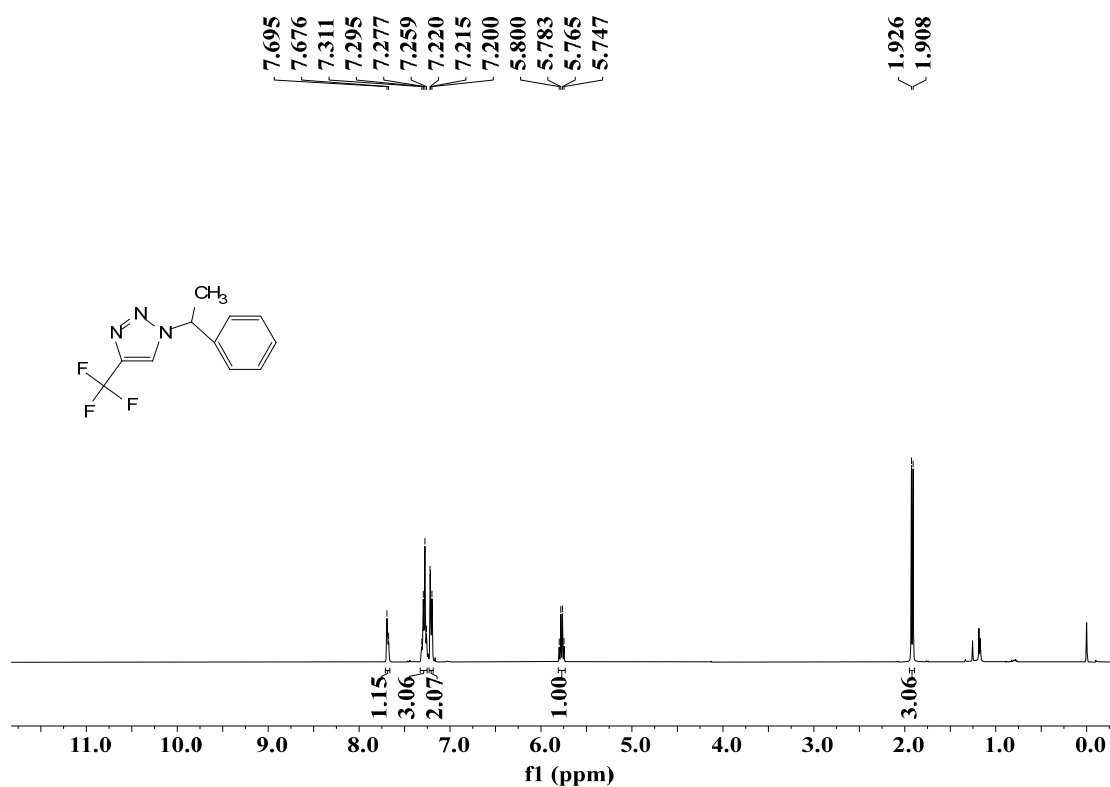

4e-<sup>1</sup>H NMR

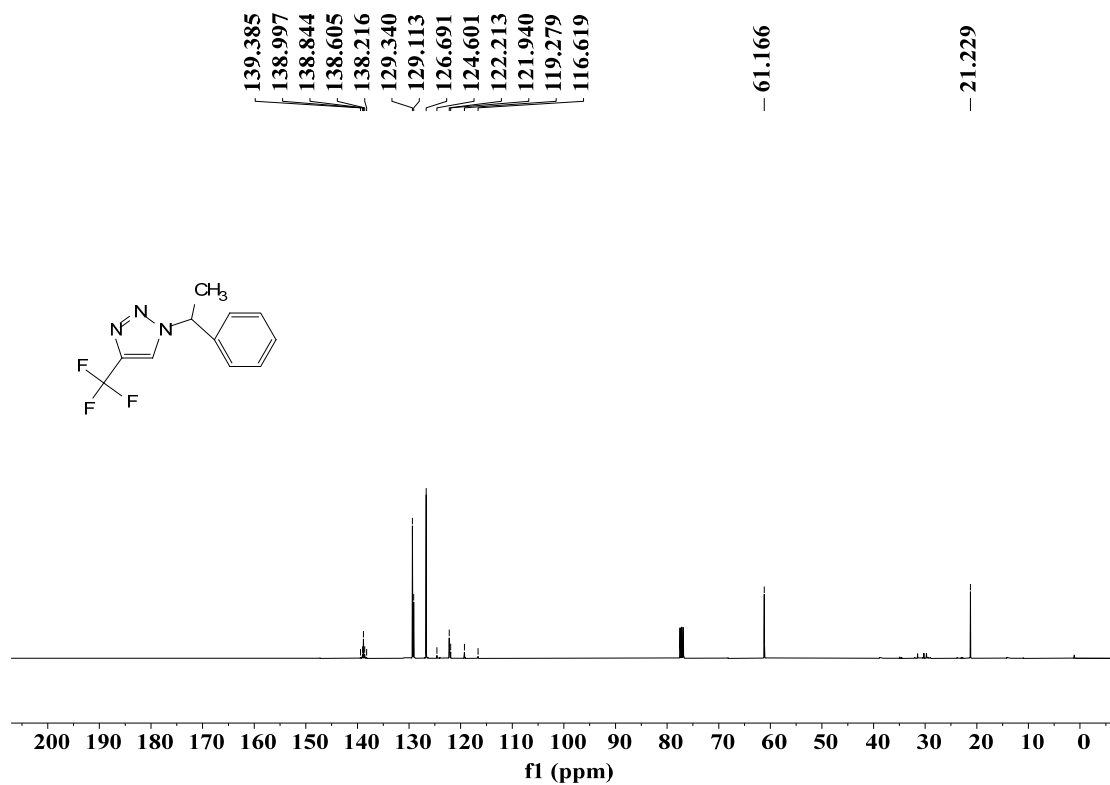

4e-<sup>13</sup>C NMR



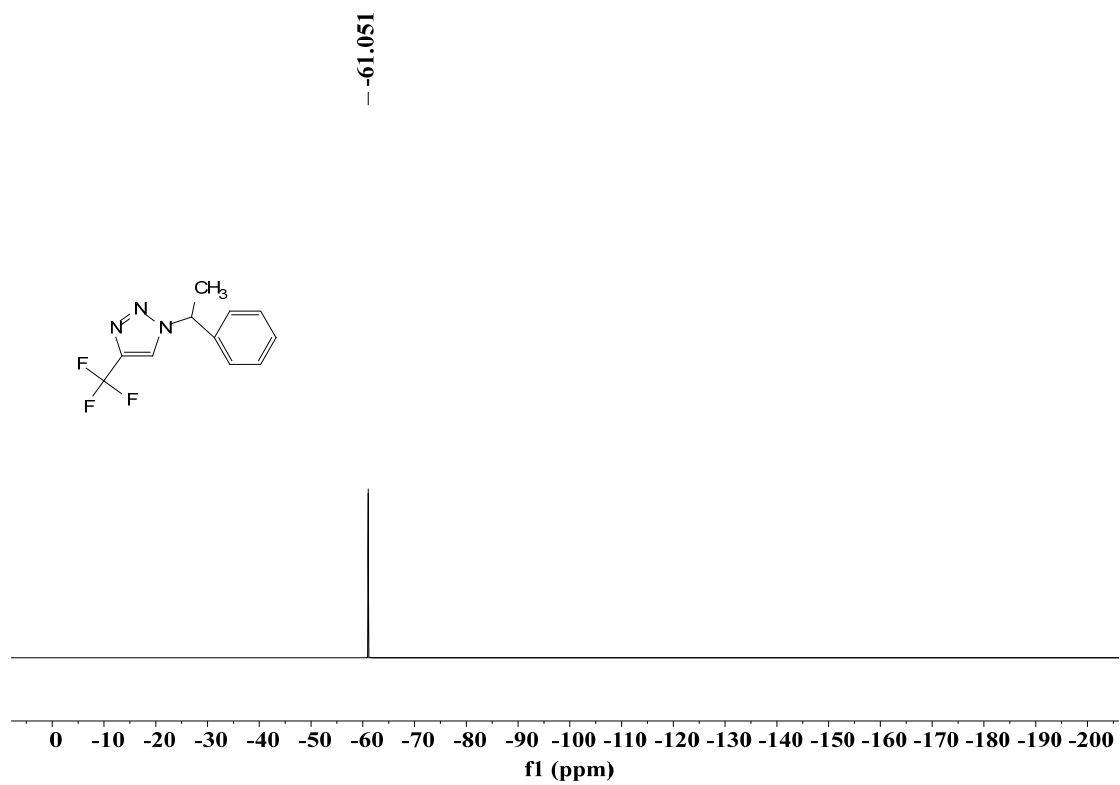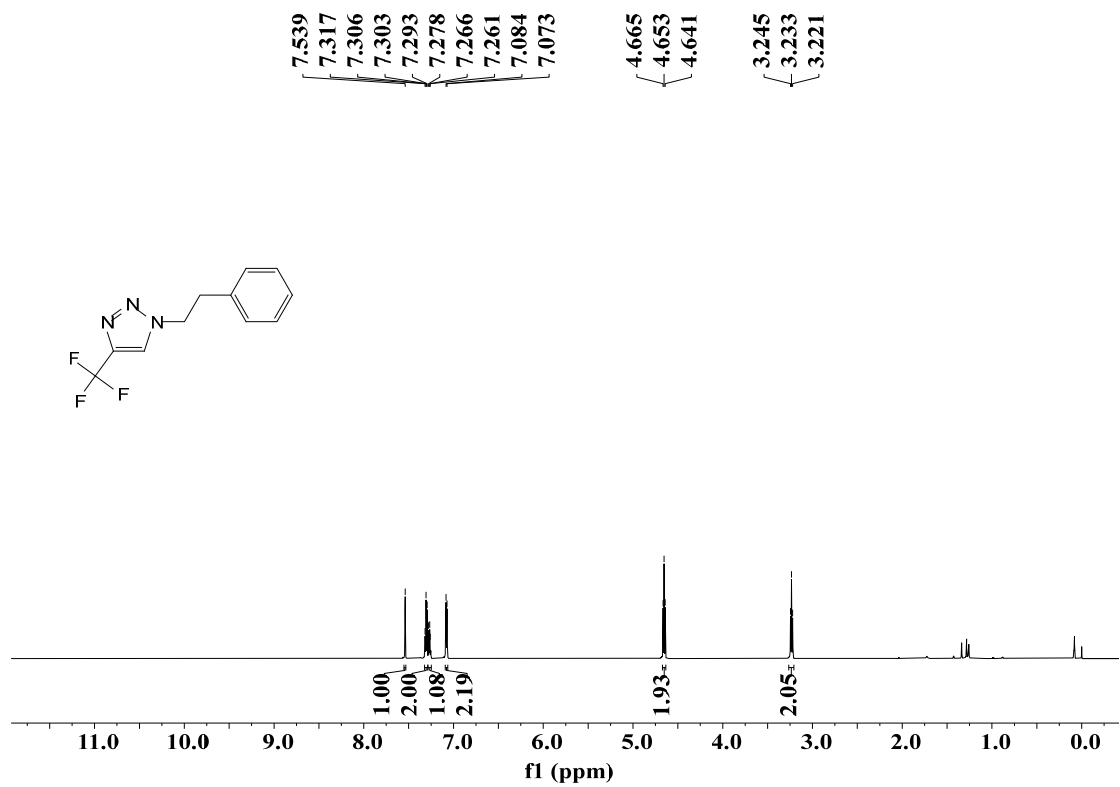

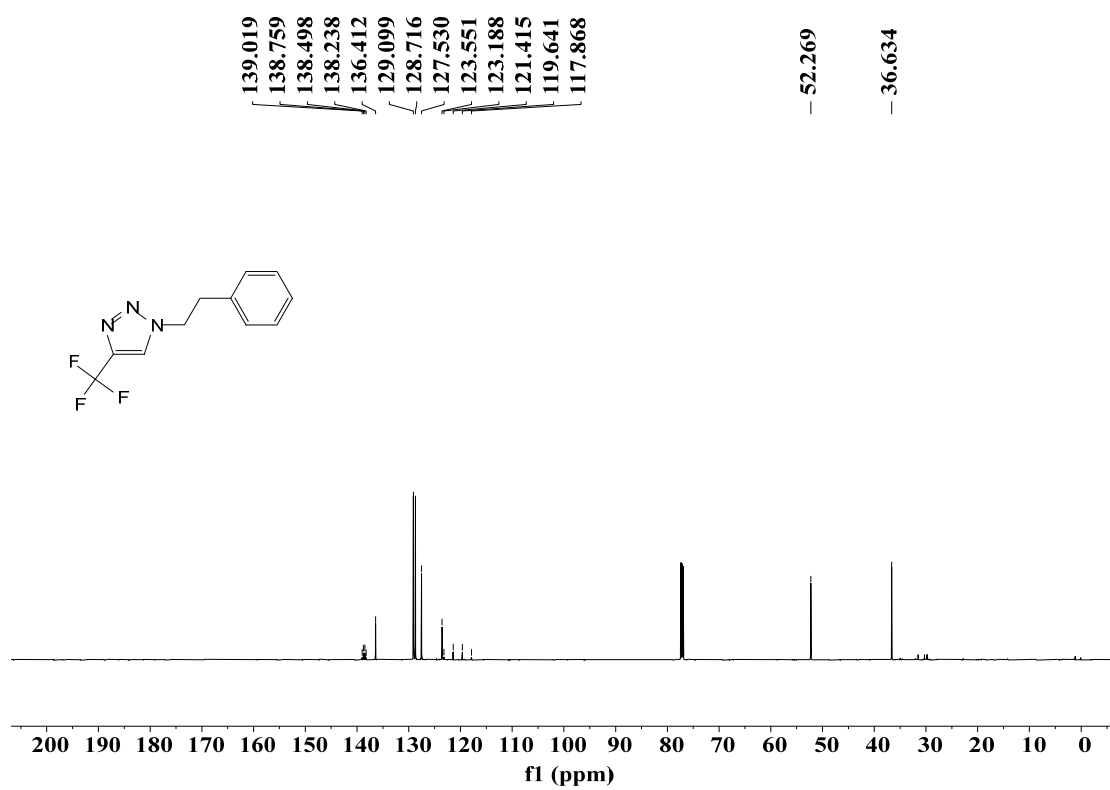

4f- $^{13}\text{C}$  NMR

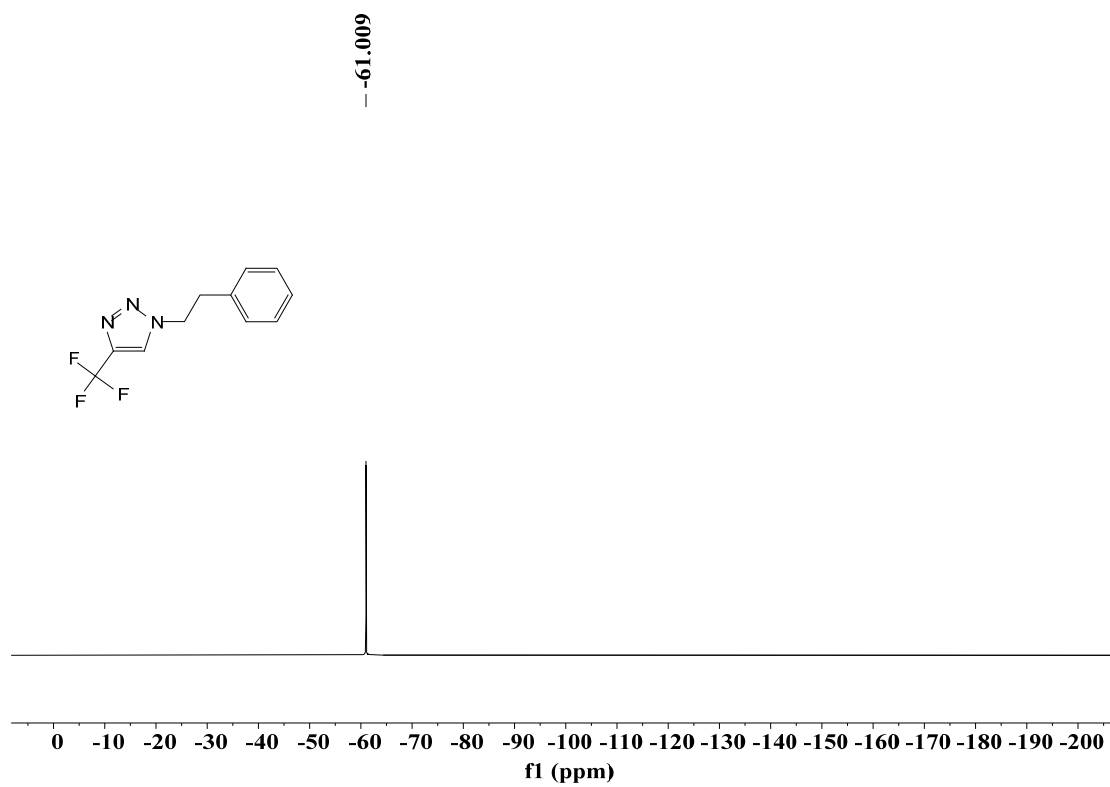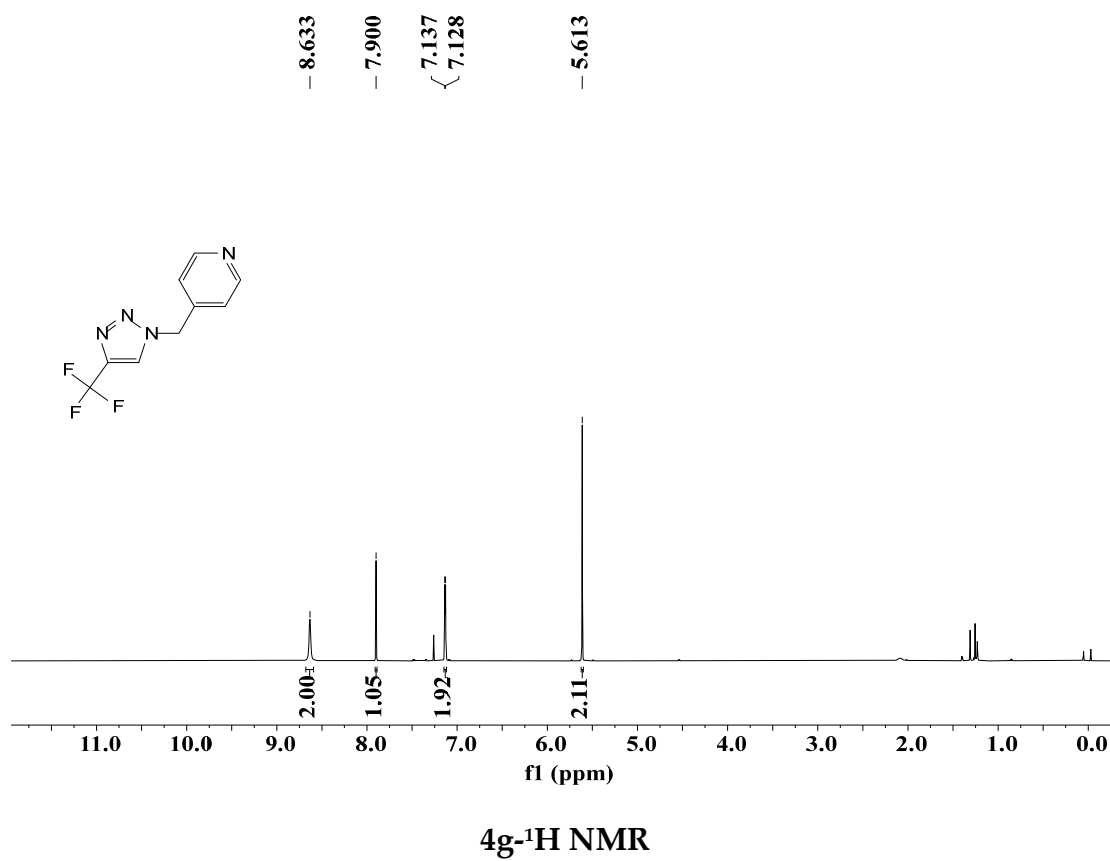

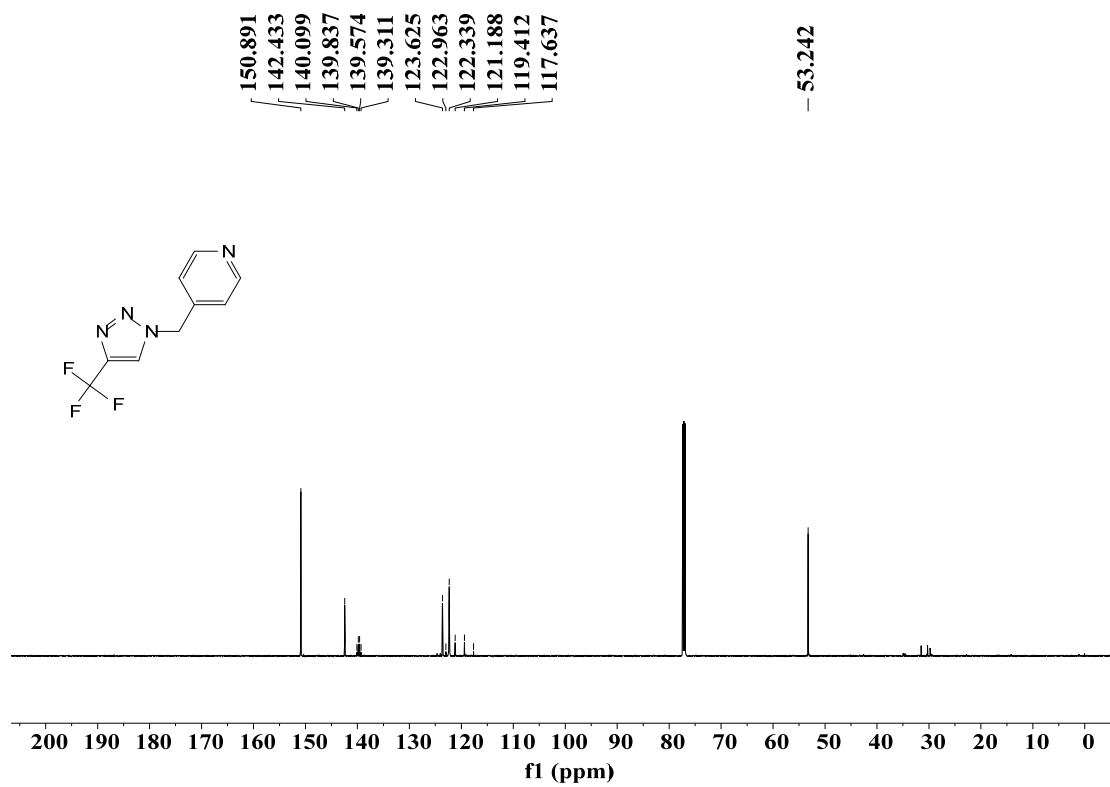

4g-<sup>13</sup>C NMR

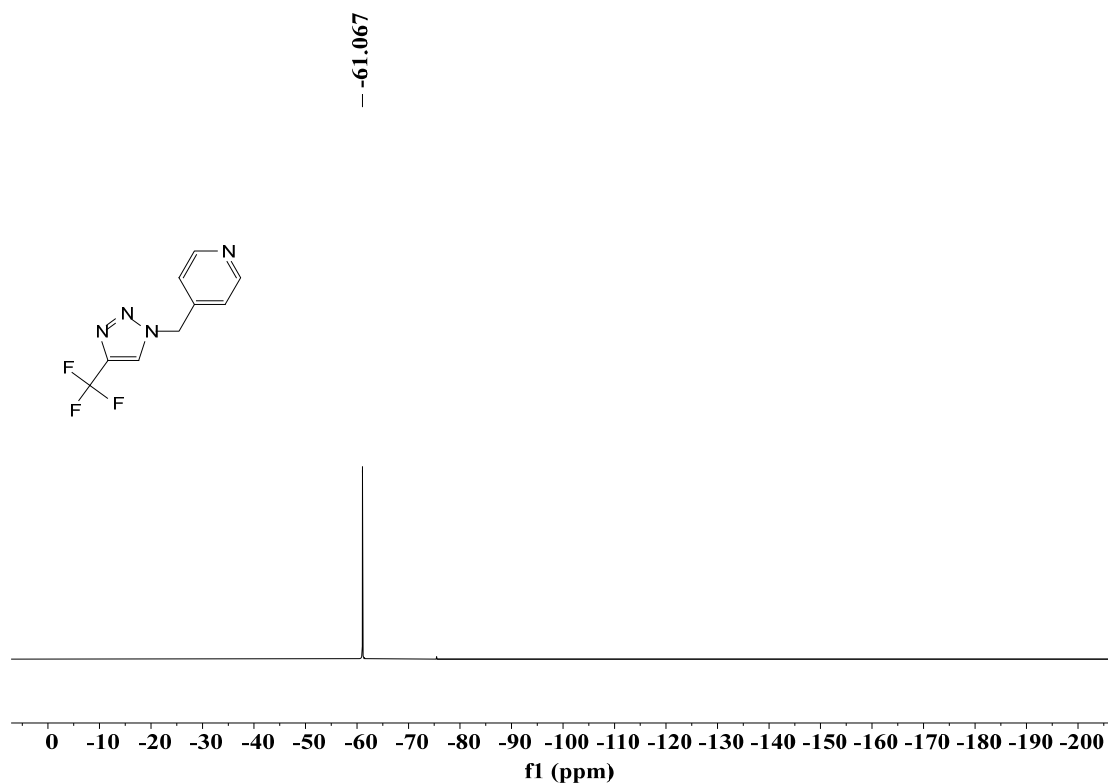

4g-<sup>19</sup>F NMR

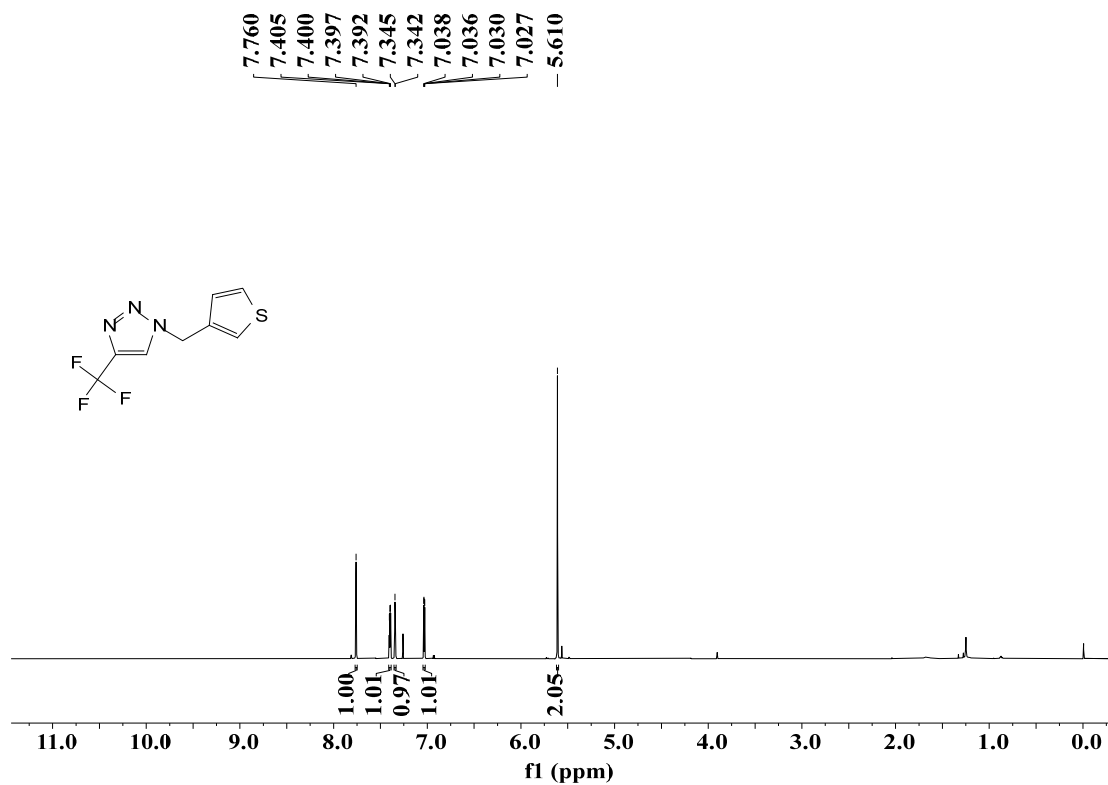

4h-<sup>1</sup>H NMR

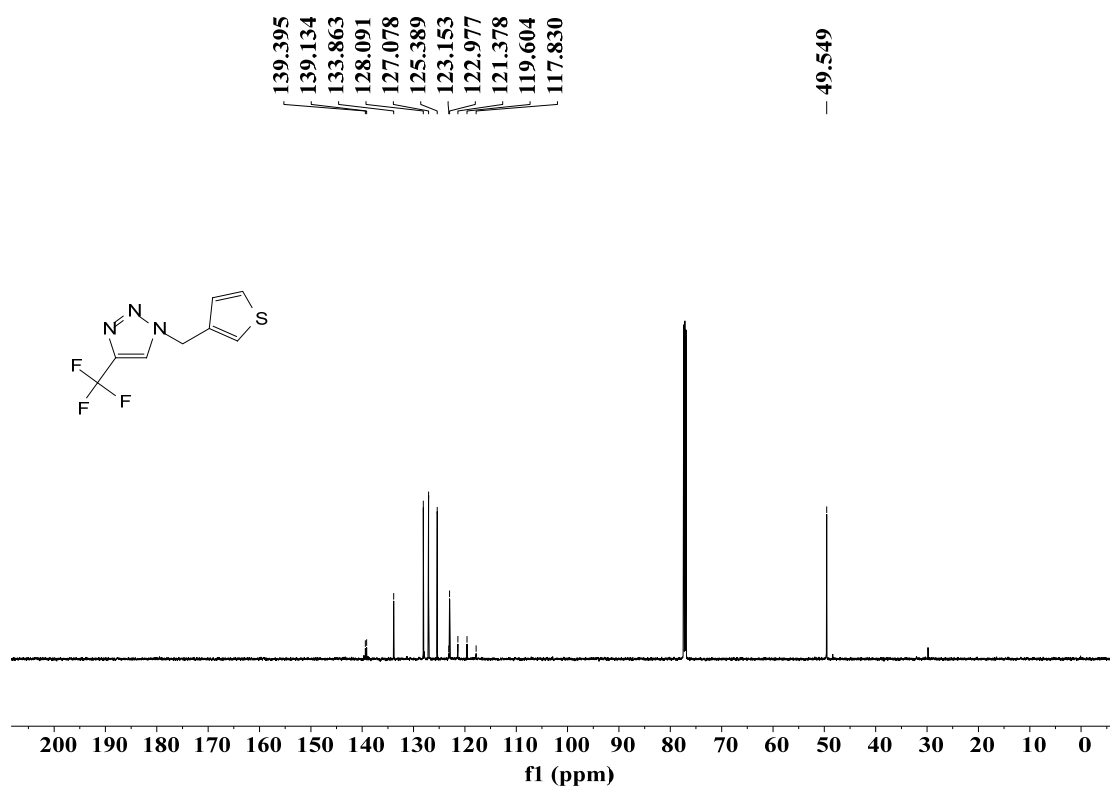

4h-<sup>13</sup>C NMR

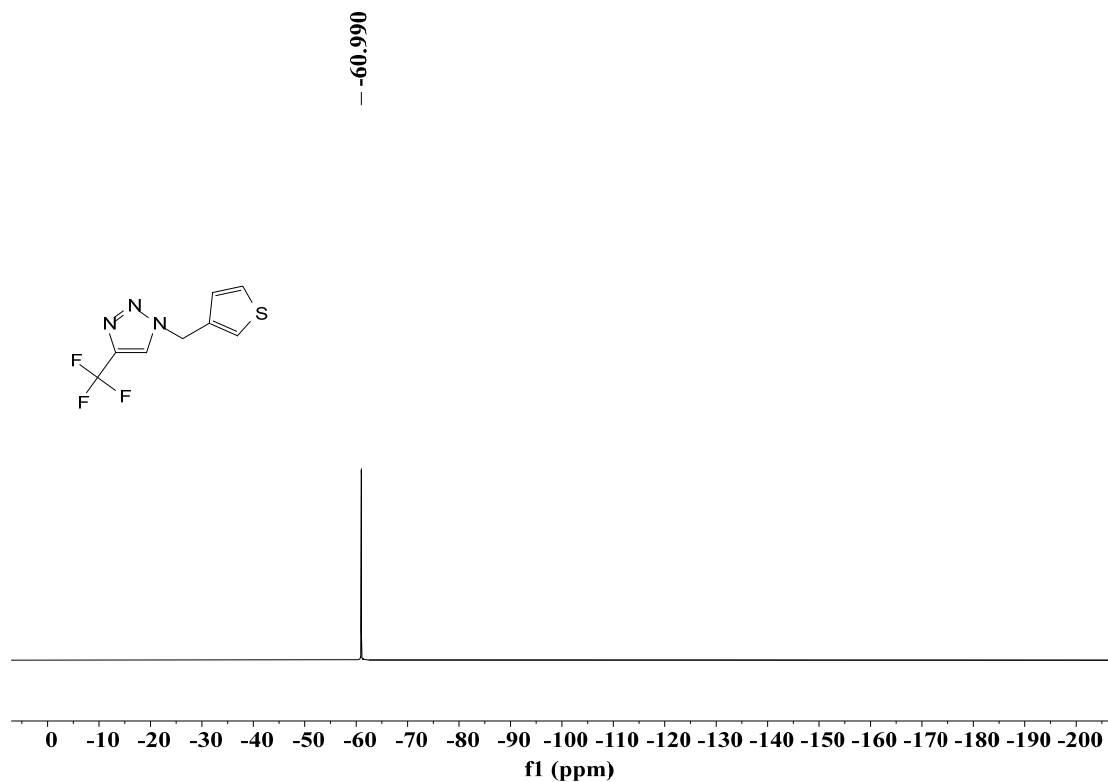

4h-<sup>19</sup>F NMR

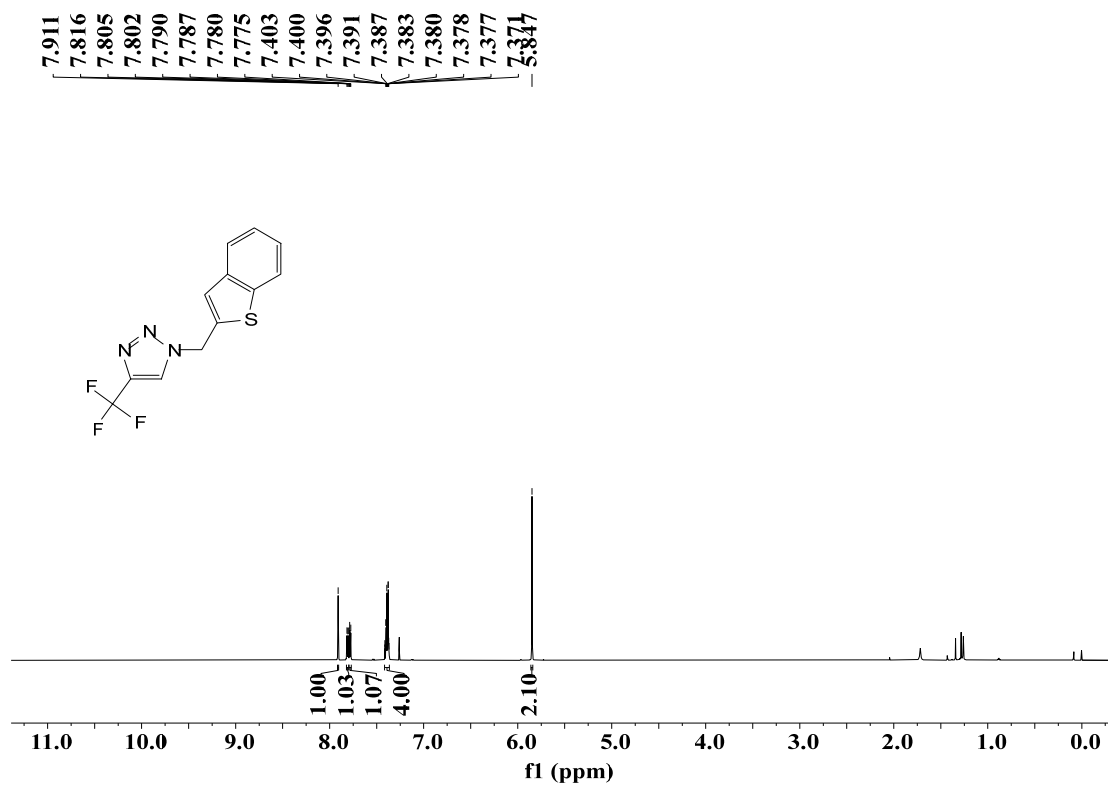

4i-<sup>1</sup>H NMR

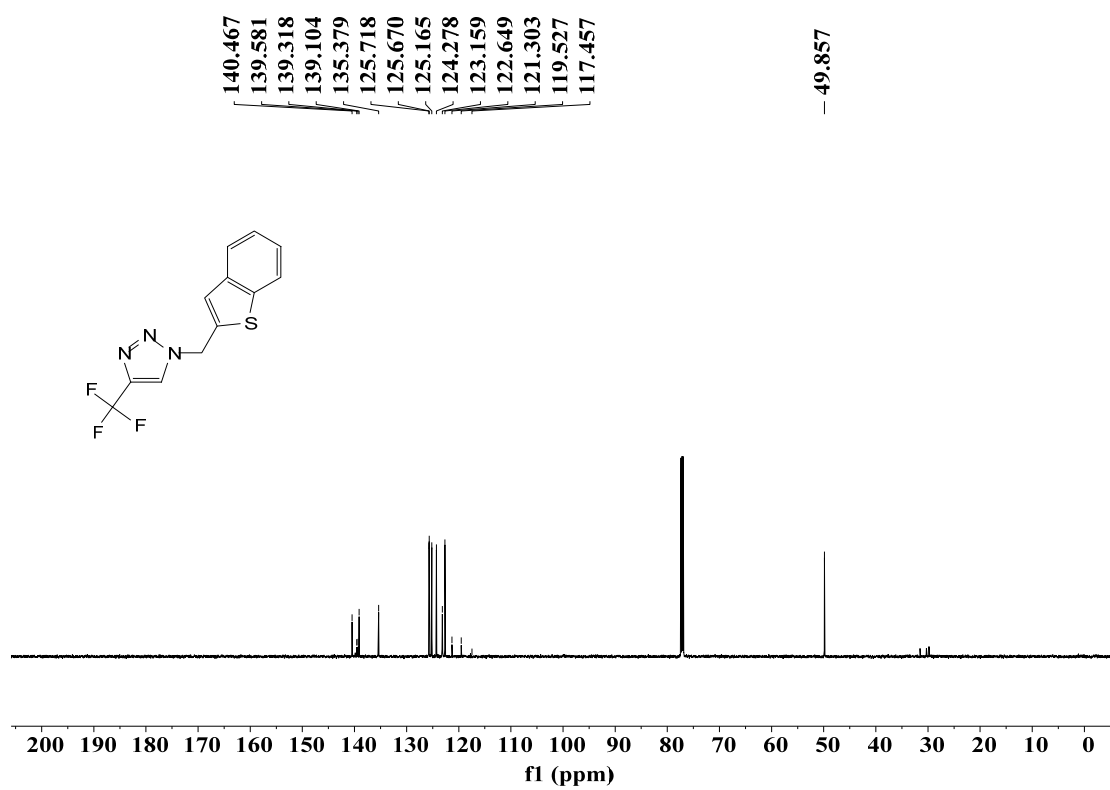

4i-<sup>13</sup>C NMR



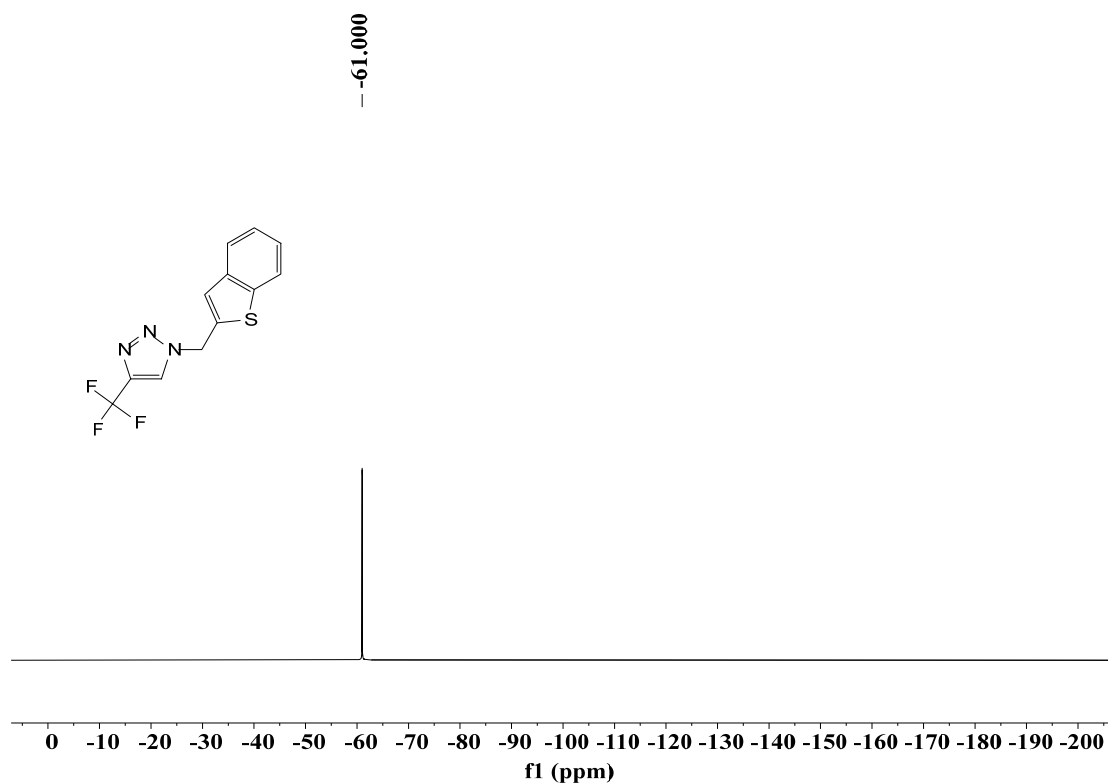

4i-<sup>19</sup>F NMR

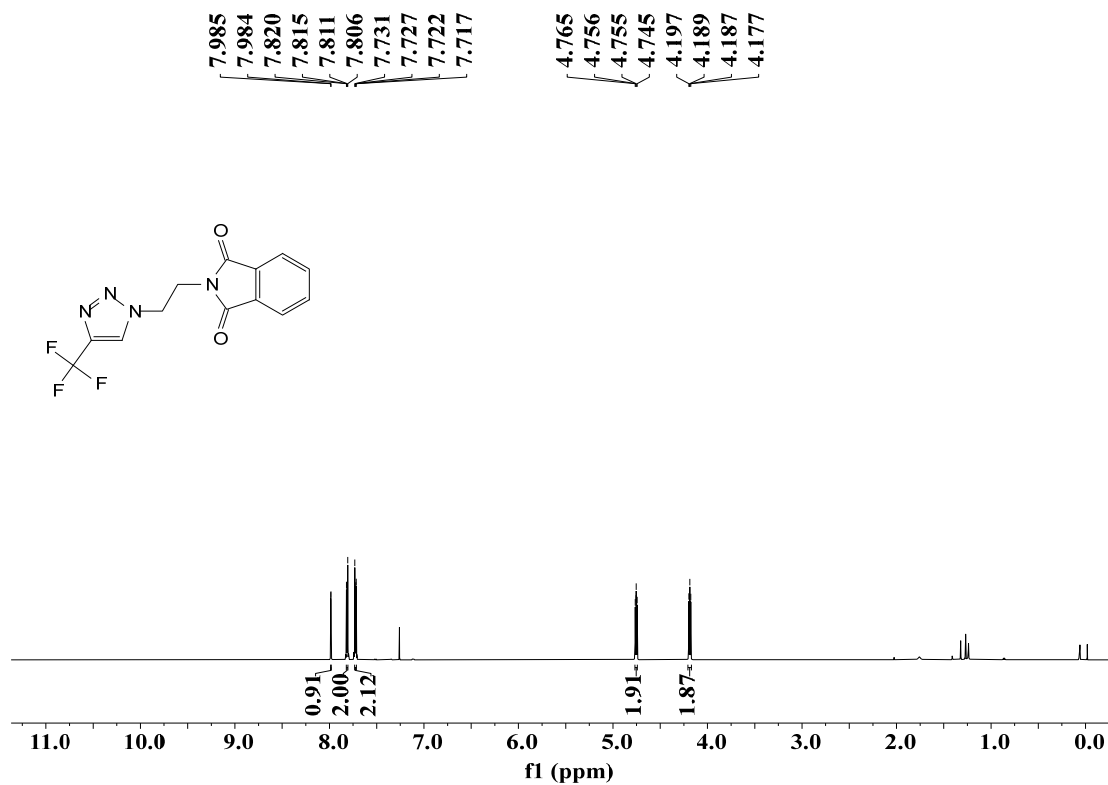

4j-<sup>1</sup>H NMR

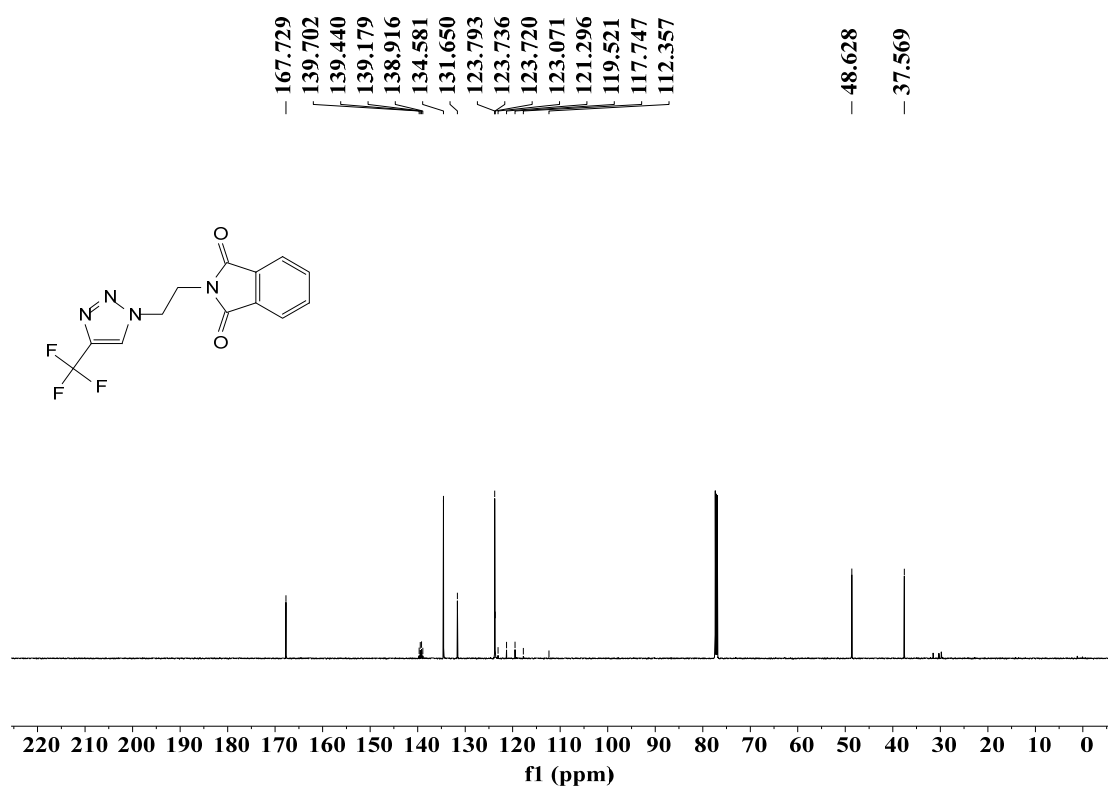

4j-<sup>13</sup>C NMR

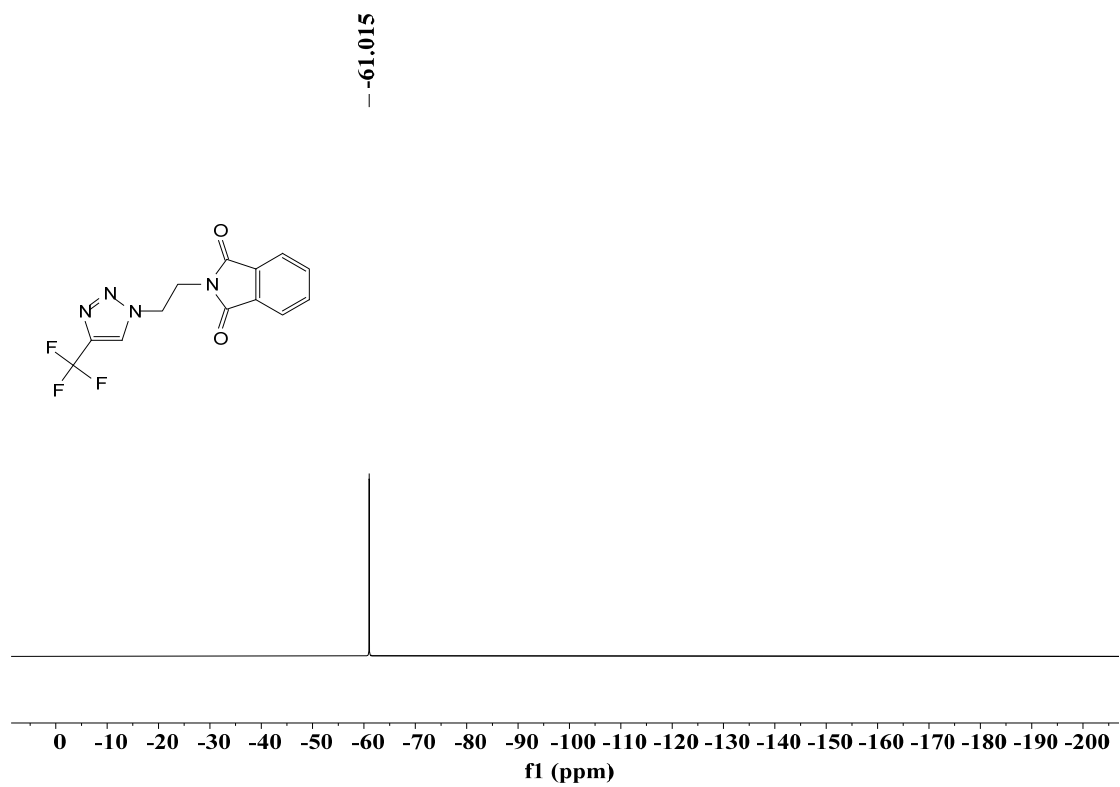

4j- $^{19}\text{F}$  NMR

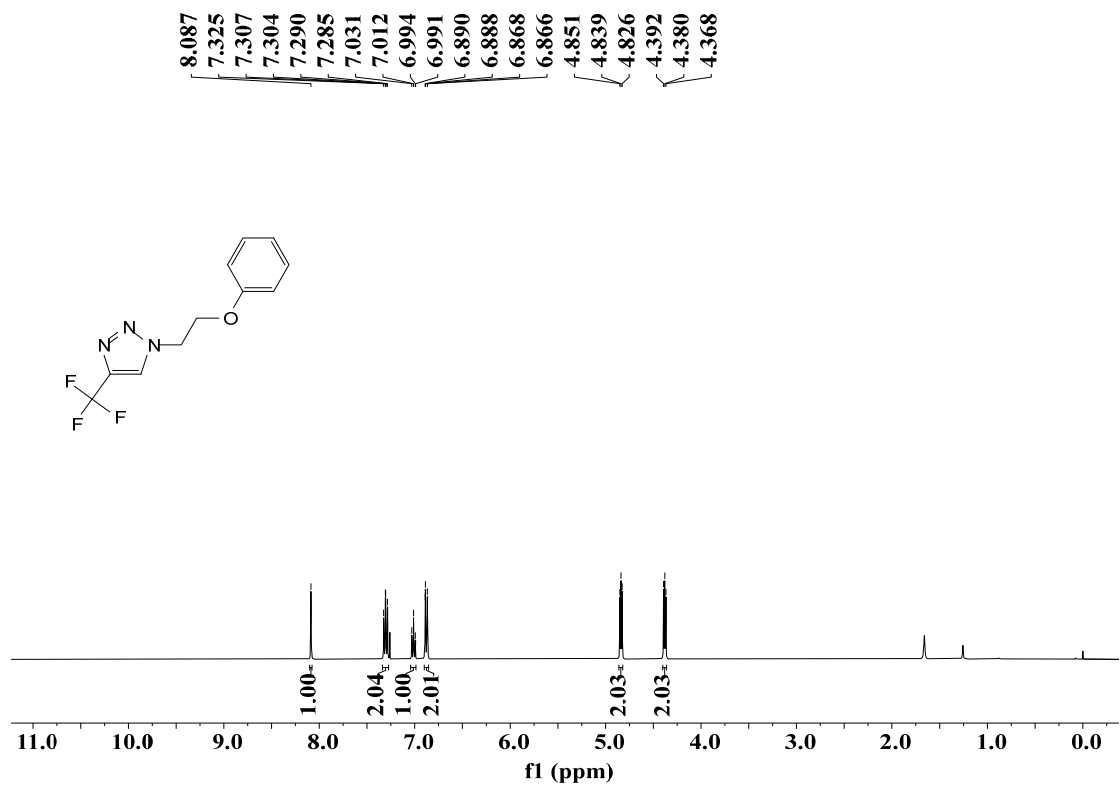

4k- $^1\text{H}$  NMR

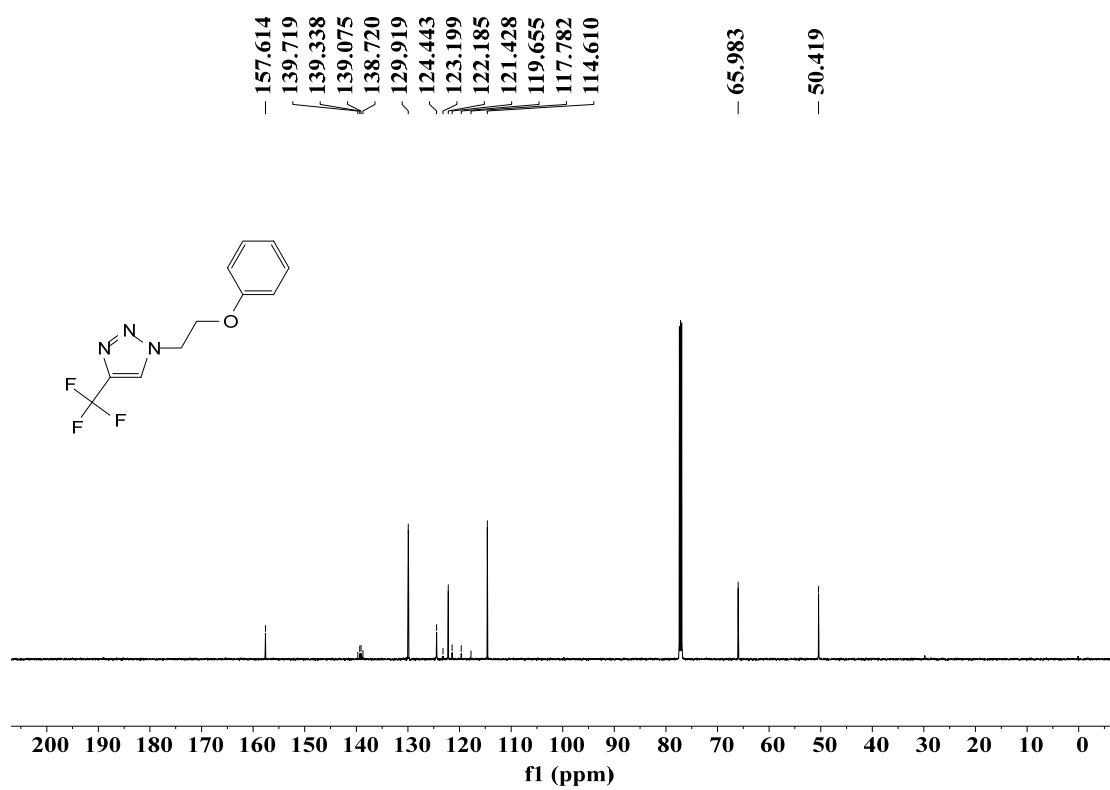

# 4k-<sup>13</sup>C NMR

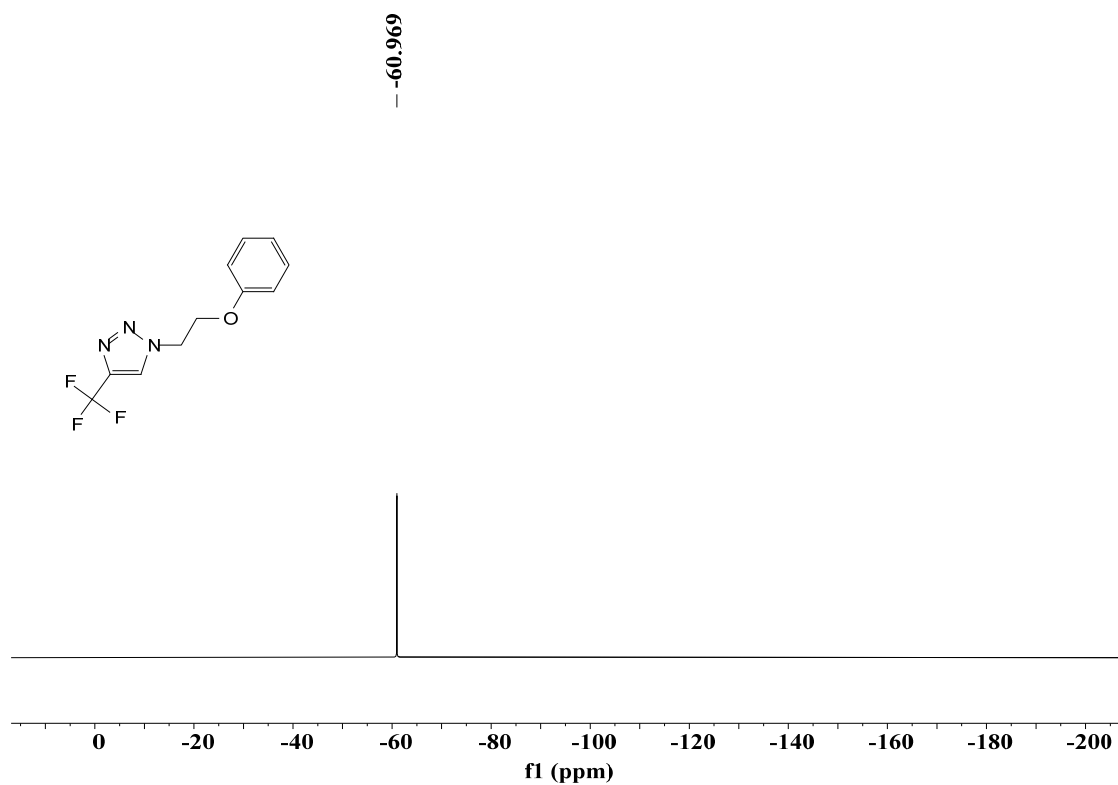

# 4k-<sup>19</sup>F NMR

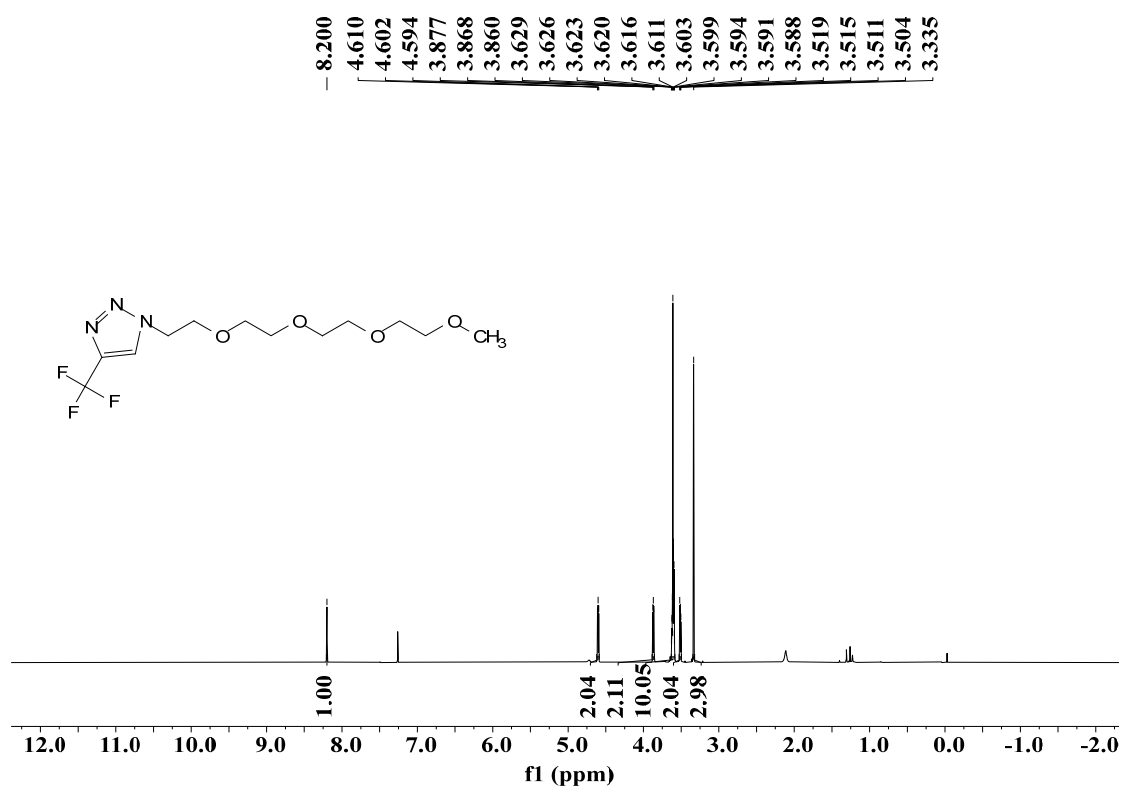

# 4l-<sup>1</sup>H NMR

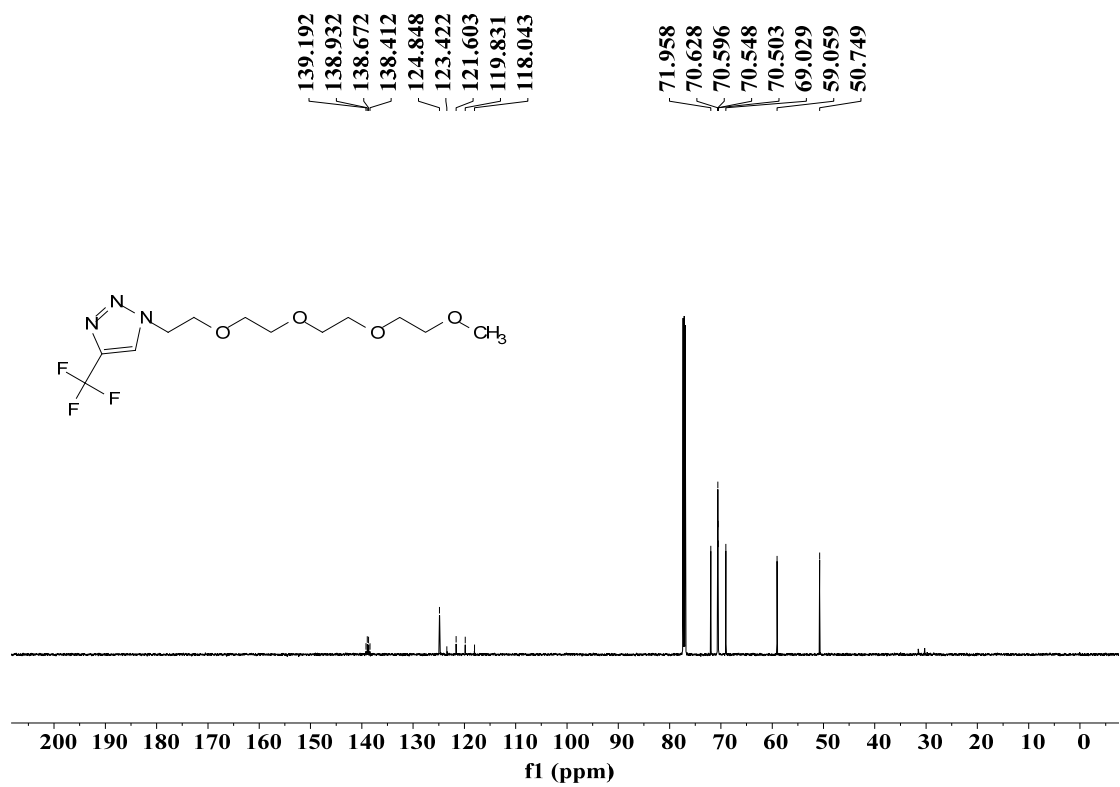

41- $^{13}\text{C}$  NMR

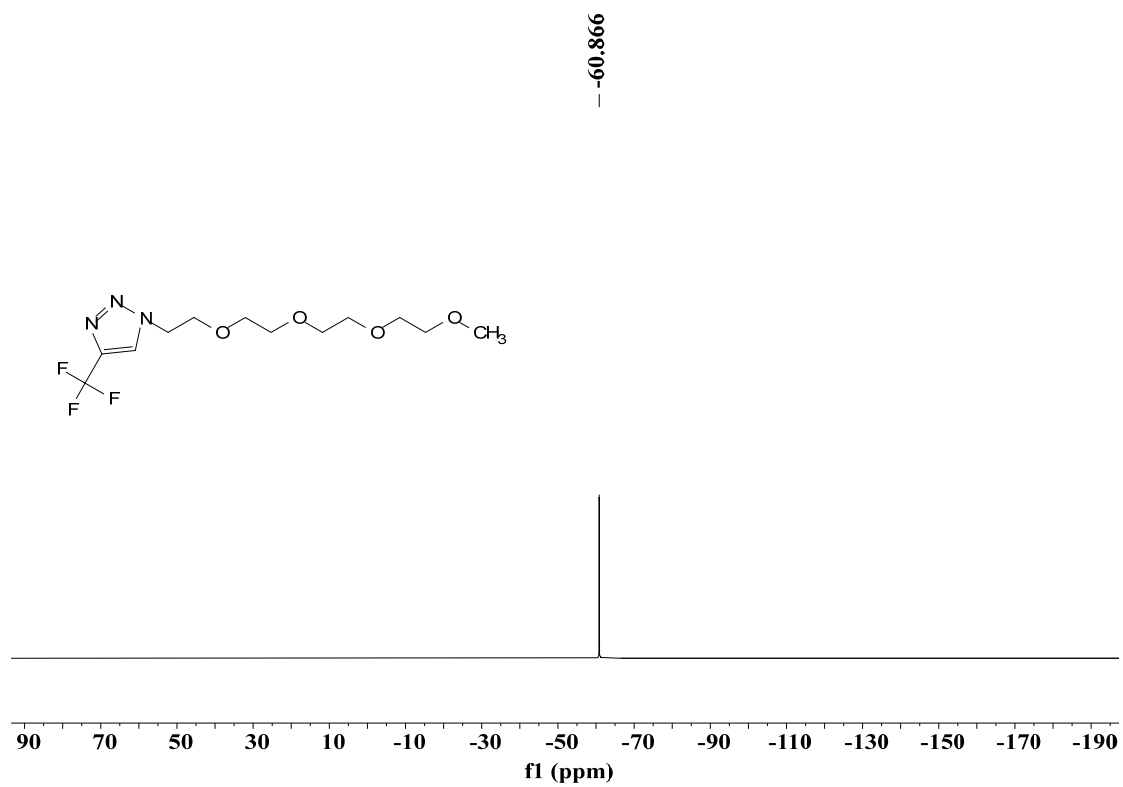

41- $^{19}\text{F}$  NMR

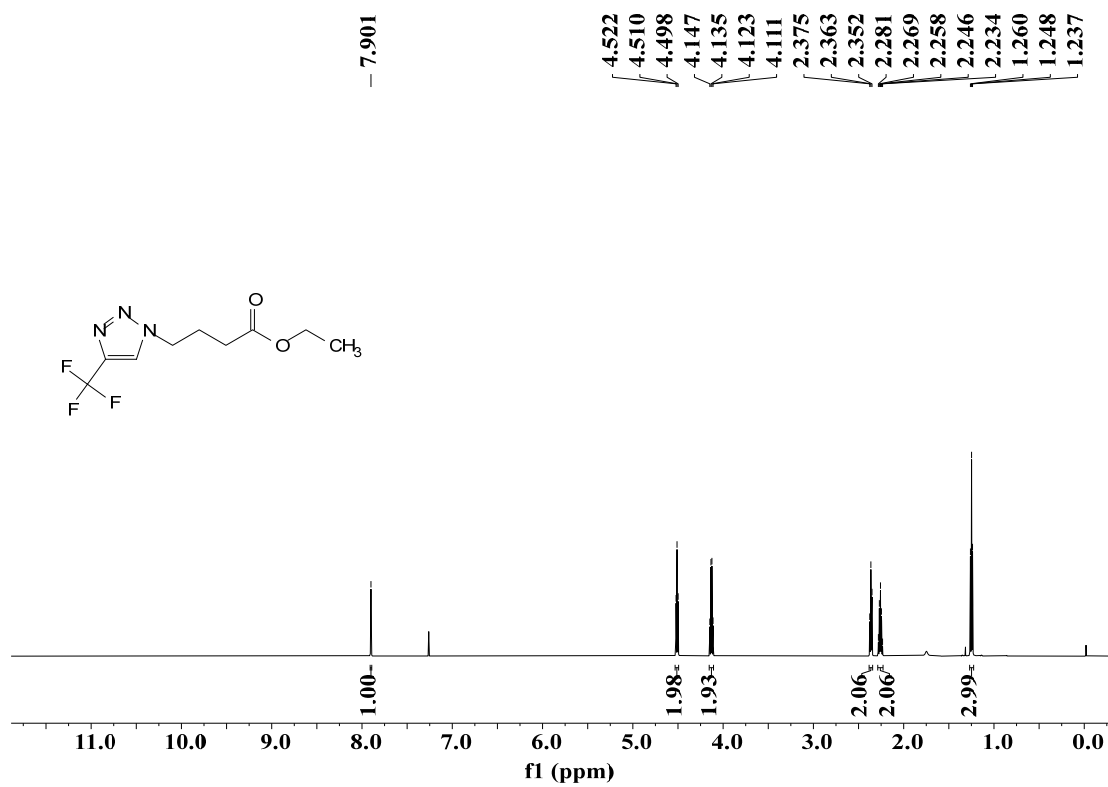

4m-<sup>1</sup>H NMR

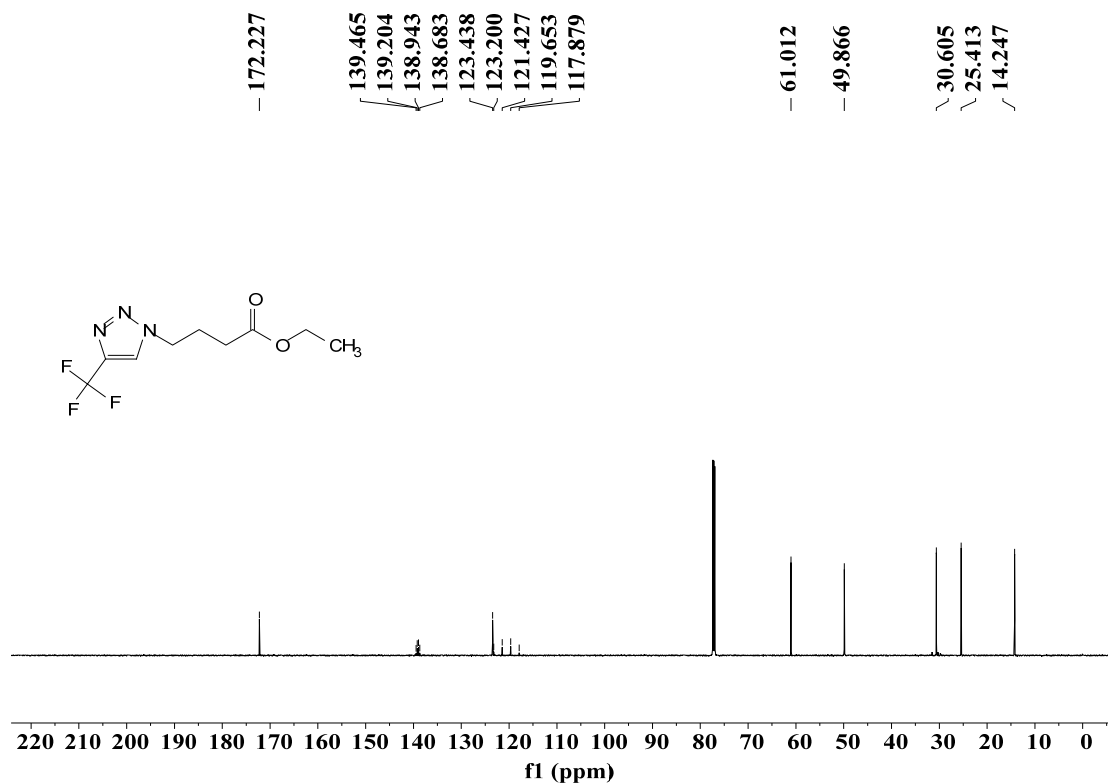

#### 4m-<sup>13</sup>C NMR

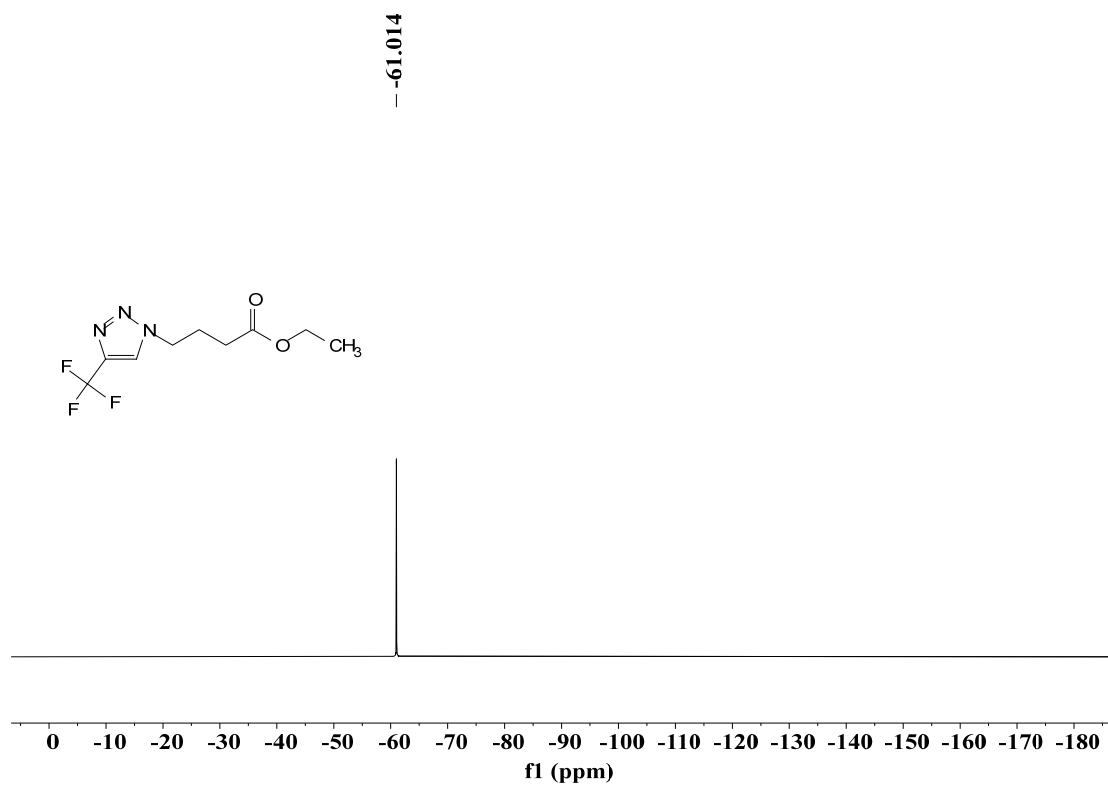

#### 4m-<sup>19</sup>F NMR



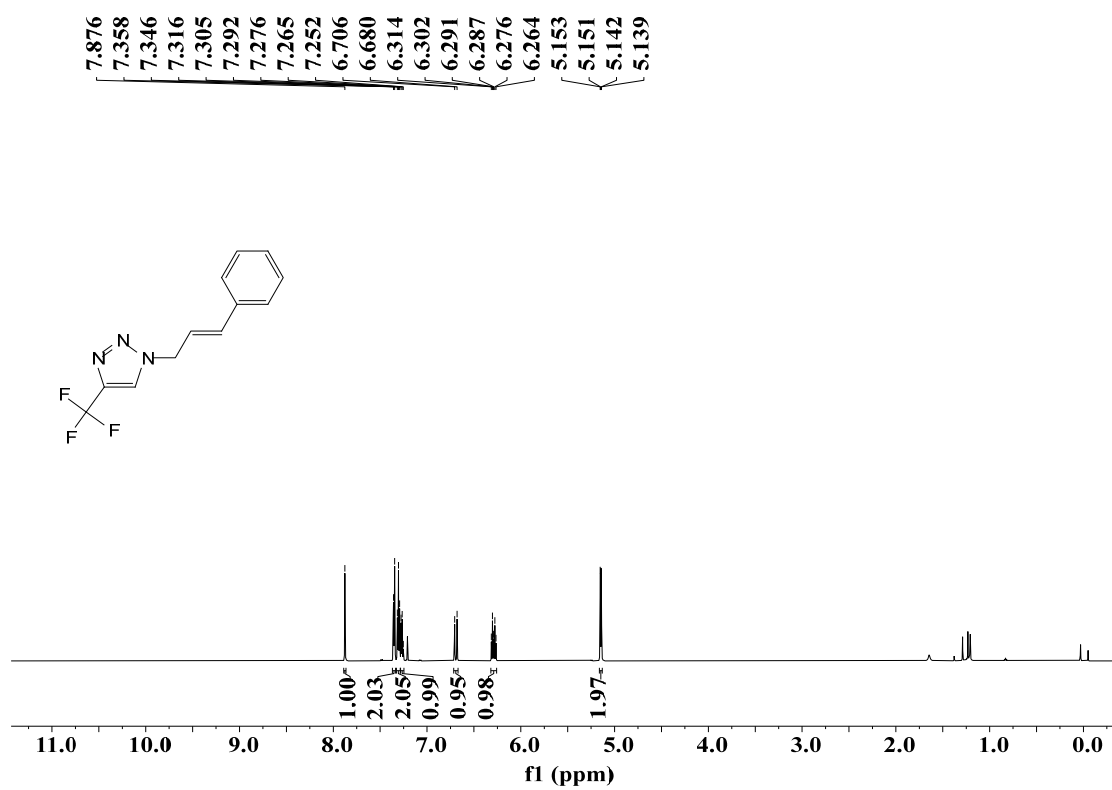

4n-<sup>1</sup>H NMR

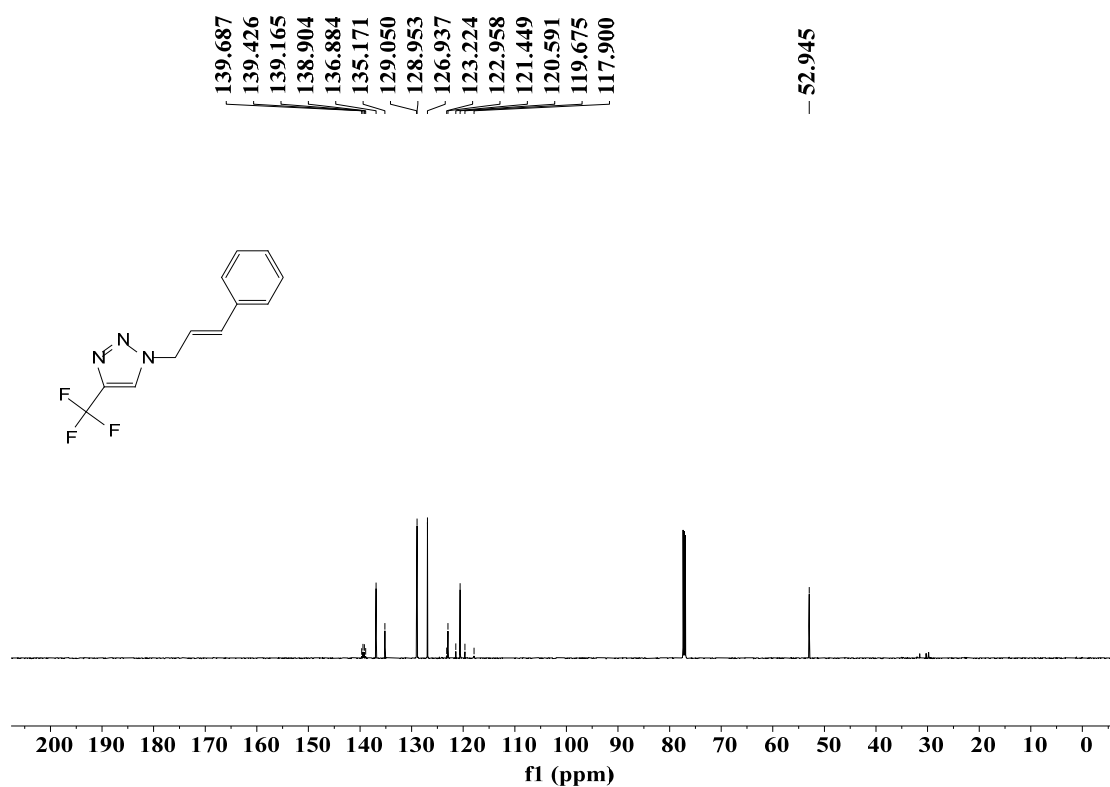

4n-<sup>13</sup>C NMR

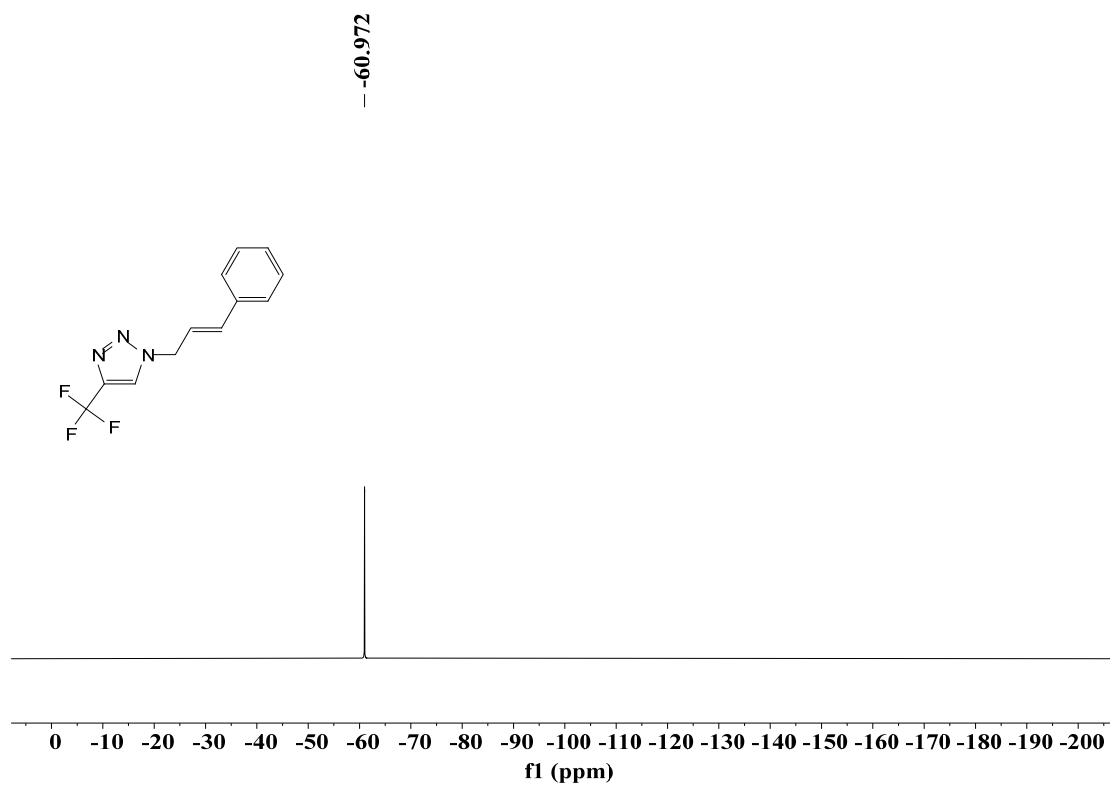

4n-<sup>19</sup>F NMR
